# Supplementary material for: The aryne Sommelet–Hauser rearrangement
Source: Royal Society of Chemistry journal article supplement (doi:10.1039/c9cc00629j), 2019-01-01
Supplement: c9cc00629j1.pdf [file c9cc00629j1.pdf]

## The Aryne Sommelet–Hauser rearrangement

Tony Roy,<sup>a,b</sup> Rahul Gaykar,<sup>c</sup> Subrata Bhattacharjee<sup>c</sup> and Akkattu T. Biju<sup>\*,c</sup>

<sup>a</sup>*Organic Chemistry Division, CSIR-National Chemical Laboratory (CSIR-NCL),  
Dr. Homi Bhabha Road, Pune 411008, India*

<sup>b</sup>*Academy of Scientific and Innovative Research (AcSIR), New Delhi 110020, India*

<sup>c</sup>*Department of Organic Chemistry, Indian Institute of Science, Bangalore-560012,  
India*

[atbiju@iisc.ac.in](mailto:atbiju@iisc.ac.in)

### Supporting Information

|                                                                                            |     |
|--------------------------------------------------------------------------------------------|-----|
| 1. General Information                                                                     | S02 |
| 2. General Procedure for the Optimization of Reaction Conditions                           | S03 |
| 3. General Procedure for the Aryne Sommelet–Hauser Rearrangement                           | S04 |
| 4. General Procedure for the Temperature-Selectivity Study                                 | S04 |
| 5. Procedure for the Aryne [1,2]Stevens Rearrangement                                      | S06 |
| 6. X-ray Data of <b>3j</b>                                                                 | S06 |
| 7. Synthesis and Characterization of $\alpha$ -Aryl Amino Acid Derivatives                 | S08 |
| 8. <sup>1</sup> H and <sup>13</sup> C NMR Spectra of $\alpha$ -Aryl Amino Acid Derivatives | S24 |

## 1. General Information

Unless otherwise specified, all reactions were carried out under an atmosphere of argon in flame-dried reaction vessels with Teflon screw caps. 28 °C corresponds to the room temperature (rt) of the lab when the experiments were carried out. THF was freshly purified by distillation over Na-benzophenone and was transferred under argon. 18-Crown-6 was recrystallized from dry CH<sub>3</sub>CN and KF was dried by heating at 110 °C for 12 h and left to cool under argon and stored in argon filled glove-box. The 2(trimethylsilyl)phenyl trifluoromethanesulfonate **2a** and the other symmetric and unsymmetric aryne precursors were synthesized following literature procedure.<sup>1</sup> All the tertiary amines **1** used were prepared following literature procedure.<sup>2</sup>

Analytical thin layer chromatography was performed on TLC Silica gel 60 F<sub>254</sub>. Visualization was accomplished with short wave UV light or KMnO<sub>4</sub> staining solutions followed by heating. Flash chromatography was performed on silica gel (230-400 mesh) by standard techniques eluting with Pet. Ether-EtOAc solvent system.

All compounds were fully characterized. <sup>1</sup>H and <sup>13</sup>C NMR spectra were recorded on Bruker Ultrashield spectrometer in CDCl<sub>3</sub> as solvent. Chemical shifts (δ) are given in ppm. The residual solvent signals were used as references and the chemical shifts converted to the TMS scale (CDCl<sub>3</sub>: δ<sub>H</sub> = 7.26 ppm, δ<sub>C</sub> = 77.16 ppm). Infrared (FT-IR) spectra were recorded on a Perkin Elmer Spectrum BX spectrophotometer, ν-max in cm<sup>-1</sup>. HRMS (ESI) data were recorded on a Waters Xevo G2-XS Q-TOF instrument.

---

<sup>1</sup>(a) Y. Sato, T. Tamura, A. Kinbara and M. Morib, *Adv. Synth. Catal.*, 2007, **349**, 647. (b) D. Peña, A. Cobas, D. Pérez and E. Guitián, *Synthesis*, 2002, 1454.

<sup>2</sup>S. H. Lim, J. Yi, G. M. Moon, C. S. Ra, K. Nahm, D. W. Cho, K. Kim, T. G. Hyung, U. C. Yoon, G. Y. Lee, S. Kim, J. Kim and P. S. Mariano, *J. Org. Chem.* 2014, **79**, 6946.

## 2. General Procedure for the Optimization of the Reaction Conditions

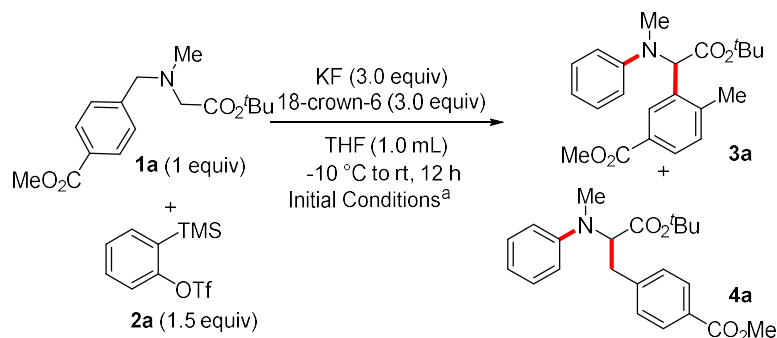

To a flame-dried screw-capped test tube equipped with a magnetic stir bar was added the KF (87 mg, 1.5 mmol) and 18-crown-6 (396 mg, 1.5 mmol) in a glove box. The mixture was dissolved in THF (1.0 mL) under argon atmosphere. The benzylamine **1a** (0.50 mmol) was added outside the glove box under argon atmosphere and the temperature of the mixture was maintained at -10 °C (using salt and ice). To the stirring solution, aryne precursor **2a** (0.75 mmol) was added. It was allowed to warm to rt and stirred for 12 h. After 12 h, the solvent was evaporated and the crude residue pre-adsorbed on silica gel and purified by flash column chromatography silica gel to afford the corresponding Sommelet-Hauser rearrangement product **3a** and Stevens rearrangement product **4a**.

| entry          | Variation of initial conditions      | yield of <b>3a</b> (%) <sup>b</sup> | yield of <b>4a</b> (%) <sup>b</sup> |
|----------------|--------------------------------------|-------------------------------------|-------------------------------------|
| 1              | None                                 | 65                                  | 18                                  |
| 2              | 2.0 equiv of <b>2a</b>               | 61                                  | <5                                  |
| 3 <sup>c</sup> | CsF instead of KF and 18-crown-6     | 32                                  | 30                                  |
| 4              | TBAF instead of KF and 18-crown-6    | 33                                  | 29                                  |
| 5              | TBAT instead of KF and 18-crown-6    | <5                                  | 33                                  |
| 6              | -40 °C to rt instead of -10 °C to rt | 65                                  | 15                                  |
| 7              | -20 °C to rt instead of -10 °C to rt | 64                                  | 18                                  |
| 8              | 0 ° to rt instead of -10 °C to rt    | 58                                  | 19                                  |
| 9              | -10 °C for 5h, warmed to rt, 12 h    | 70                                  | 7                                   |
| 10             | rt instead of -10 °C to rt.          | 35                                  | 38                                  |

<sup>a</sup> Initial conditions: **1a** (0.25 mmol), **2a** (0.375 mmol), fluoride source (3.0 equiv), 18-crown-6 (3.0 equiv), THF (1.0 mL) <sup>b</sup> Yields of isolated products are given. <sup>c</sup> The reaction performed using CH<sub>3</sub>CN as the solvent. 28 °C corresponds to the room temperature.

### 3. General Procedure for the Aryne Sommelet-Hauser Rearrangement

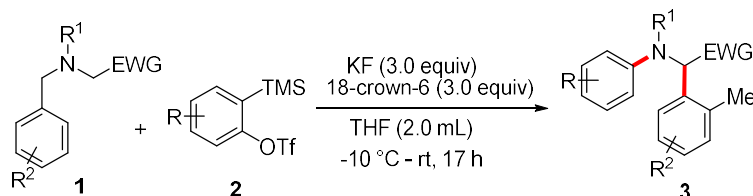

To a flame-dried screw-capped test tube equipped with a magnetic stir bar was added the KF (87 mg, 1.5 mmol) and 18-crown-6 (396 mg, 1.5 mmol) in a glove box. The mixture was dissolved in THF (2.0 mL) under argon atmosphere. The benzylamine **1** (0.50 mmol) was added outside the glove box under argon atmosphere and the temperature of the mixture was maintained at -10 °C. To the stirring solution, aryne precursor **2** (0.75 mmol) was added. Then the reaction mixture was allowed to react at -10 °C for 5 h. It was then allowed to warm to rt and stirred for 12 h. After 12 h, the solvent was evaporated and the crude residue pre-adsorbed on silica gel and purified by flash column chromatography (Pet. ether /EtOAc = 97/03) on silica gel to afford the corresponding α-amino acid derivatives **3** in moderate to good yields.

### 4. General Procedure for the Temperature-Selectivity Study<sup>a</sup>

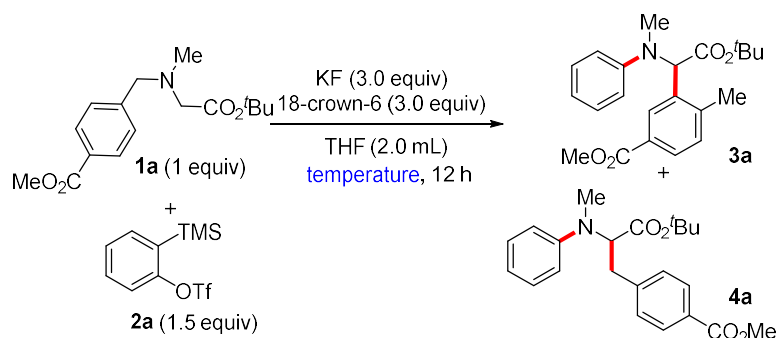

To a flame-dried screw-capped test tube equipped with a magnetic stir bar was added the KF (87 mg, 1.5 mmol) and 18-crown-6 (396 mg, 1.5 mmol) in a glove box. The mixture was dissolved in THF (2.0 mL) under argon atmosphere. The methyl 4-(((2-(*tert*-butoxy)-2-oxoethyl)(methyl)amino)methyl)benzoate **1a** (0.147 g, 0.50 mmol) was added outside the glove box under argon. To the stirring solution, 2-(trimethylsilyl)phenyl trifluoromethanesulfonate **2a**

(0.223 g, 182  $\mu$ L, 0.75mmol) was added. Then the reaction mixture is allowed to react at the temperature as mentioned in the table below for 12 h. After 12 h, the solvent was evaporated and the crude residue pre-adsorbed on silica gel and purified by flash column chromatography silica gel to afford the corresponding Sommelet-Hauser rearrangement product **3a** and Stevens rearrangement product **4a**. A graph is plotted with the results obtained (See Figure 1.).

| entry | Temperature | yield of <b>3a</b> (%) <sup>b</sup> | yield of <b>4a</b> (%) <sup>b</sup> |
|-------|-------------|-------------------------------------|-------------------------------------|
| 1     | -40 °C      | 68                                  | 6                                   |
| 2     | -20 °C      | 65                                  | 7                                   |
| 3     | 0 °C        | 55                                  | 20                                  |
| 4     | 20 °C       | 40                                  | 35                                  |
| 5     | 40 °C       | 34                                  | 38                                  |
| 6     | 60 °C       | 5                                   | 60                                  |

<sup>a</sup> Standard conditions: **1a** (0.50 mmol), **2a** (0.75 mmol), KF (1.5 mmol), 18-crown-6 (1.5 mmol), THF (2.0 mL) <sup>b</sup> Yields of isolated products are given.

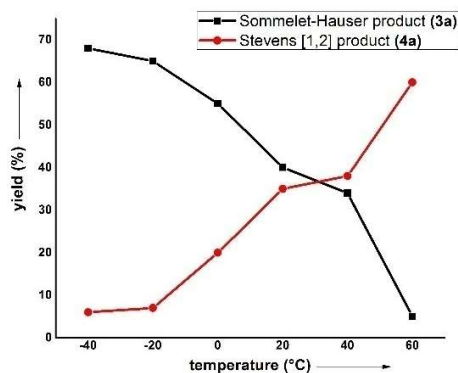

**Figure 1.** Variation of selectivity with temperature

## 5. Procedure for the Aryne [1,2] Stevens Rearrangement

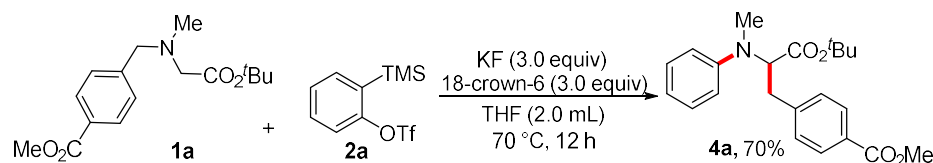

To a flame-dried screw-capped test tube equipped with a magnetic stir bar was added the KF (0.087 g, 1.5 mmol) and 18-crown-6 (0.396 g, 1.5 mmol) in a glove box. The mixture was dissolved in THF (2.0 mL) under argon atmosphere. Methyl 4-(((2-(*tert*-butoxy)-2-oxoethyl)(methyl)amino)methyl)benzoate **1a** (0.147 g, 0.50 mmol) was added outside the glove box under argon atmosphere. To the stirring solution, 2-(trimethylsilyl)phenyl trifluoromethanesulfonate **2a** (0.223 g, 182 $\mu$ L, 0.75mmol) was added. Then, the reaction mixture was allowed to react at 70 °C for 12 h. After 12 h, the reaction was stopped, the solvent was evaporated and the crude residue pre-adsorbed on silica gel and purified by flash column chromatography (Pet. ether /EtOAc = 97/03) on silica gel to afford the methyl 4-(3-(*tert*-butoxy)-2-(methyl(phenyl)amino)-3-oxopropyl)benzoate **4a** as a yellow sticky oil (0.129 g, 70% yield).

## 6. X-ray Data of **3j**

Single crystal of **3j** (recrystallized from CH<sub>2</sub>Cl<sub>2</sub> at 25 °C) was mounted and the diffraction data was collected at 296 K on a Bruker SMART APEX CCD diffractometer using SMART/SAINT software. Intensity data were collected using graphite-monochromatized Mo-K $\alpha$  radiation (71.073 pm). The structure was solved by direct methods using the SHELX-97<sup>3</sup> and refined by full-matrix least-squares on F<sup>2</sup>. Empirical absorption corrections were applied with SADABS.<sup>4</sup> All Non-hydrogen atoms were refined anisotropically and hydrogen atoms were included in geometric positions. Structure was drawn using Olex-2 and ORTEP-3. The crystallographic refinement parameters are given below:

<sup>3</sup>G. M. SHELXL-2013 Sheldrick, University of Göttingen: Göttingen, Germany, **2014**.

<sup>4</sup>G. M. Sheldrick, SADABS, University of Göttingen, Göttingen, Germany, **1999**.

|                                             |                                                               |
|---------------------------------------------|---------------------------------------------------------------|
| CCDC                                        | CCDC 1866857                                                  |
| Identification code                         | <b>3j</b>                                                     |
| Empirical formula                           | C <sub>21</sub> H <sub>24</sub> N <sub>2</sub> O <sub>2</sub> |
| Formula weight                              | 336.42                                                        |
| Temperature/K                               | 296(2)                                                        |
| Crystal system                              | monoclinic                                                    |
| Space group                                 | P2 <sub>1</sub> /n                                            |
| a/Å                                         | 9.1707(14)                                                    |
| b/Å                                         | 11.2534(18)                                                   |
| c/Å                                         | 19.035(3)                                                     |
| α/°                                         | 90                                                            |
| β/°                                         | 98.717(5)                                                     |
| γ/°                                         | 90                                                            |
| Volume/Å <sup>3</sup>                       | 1941.7(5)                                                     |
| Z                                           | 4                                                             |
| ρ <sub>calc</sub> /cm <sup>3</sup>          | 1.151                                                         |
| μ/mm <sup>-1</sup>                          | 0.074                                                         |
| F(000)                                      | 720.0                                                         |
| Crystal size/mm <sup>3</sup>                | 0.25 × 0.15 × 0.12                                            |
| Radiation                                   | MoKα (λ = 0.71073)                                            |
| 2θ range for data collection/°              | 5.77 to 55.174                                                |
| Index ranges                                | -11 ≤ h ≤ 11, -14 ≤ k ≤ 14, -24 ≤ l ≤ 24                      |
| Reflections collected                       | 60101                                                         |
| Independent reflections                     | 4473 [R <sub>int</sub> = 0.0383, R <sub>sigma</sub> = 0.0186] |
| Data/restraints/parameters                  | 4473/0/231                                                    |
| Goodness-of-fit on F <sup>2</sup>           | 1.360                                                         |
| Final R indexes [I ≥ 2σ (I)]                | R <sub>1</sub> = 0.0590, wR <sub>2</sub> = 0.1847             |
| Final R indexes [all data]                  | R <sub>1</sub> = 0.0852, wR <sub>2</sub> = 0.1998             |
| Largest diff. peak/hole / e Å <sup>-3</sup> | 0.19/-0.13                                                    |

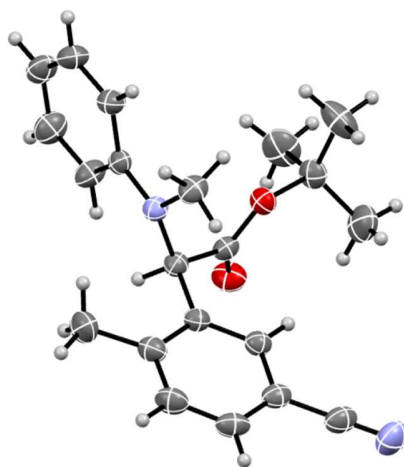

Ortep Diagram of **3j** (thermal ellipsoids are shown with 30% probability).

## 7. Synthesis and Characterization of $\alpha$ -Aryl Amino Acid Derivatives

### Methyl 3-(2-(*tert*-butoxy)-1-(methyl(phenyl)amino)-2-oxoethyl)-4-methylbenzoate (**3a**)

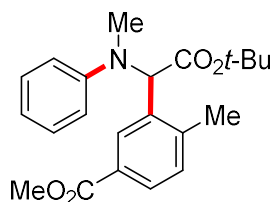

Following the general procedure, treatment of methyl 4-(((2-(*tert*-butoxy)-2-oxoethyl)(methyl)amino)methyl)benzoate **1a** (0.147 g, 0.5 mmol) and 2-(trimethylsilyl)phenyl trifluoromethanesulfonate **2a** (0.223 g, 182  $\mu$ L, 0.75 mmol) in the presence of KF (0.087 g, 1.5 mmol) and 18-crown-6 (0.396 g, 1.5 mmol) in THF (2.0 mL) at  $-10^{\circ}\text{C}$  for 5 h, then warming to rt for 12 h followed by flash column chromatography (Pet. ether/EtOAc = 97/03) of the crude reaction mixture using silica gel afforded methyl 3-(2-(*tert*-butoxy)-1-(methyl(phenyl)amino)-2-oxoethyl)-4-methylbenzoate **3a** as a colourless sticky liquid (0.129 g, 70% yield).

$R_f$  (Pet. ether/EtOAc = 95/05): 0.53;  $^1\text{H NMR}$  (400 MHz,  $\text{CDCl}_3$ )  $\delta$  7.90-7.88 (m, 2H), 7.23 (m, 3H), 6.79-6.72 (m, 3H), 5.43 (s, 1H), 3.85 (s, 3H), 2.65 (s, 3H), 2.18 (s, 3H), 1.45 (s, 9H).  $^{13}\text{C NMR}$  (100 MHz,  $\text{CDCl}_3$ )  $\delta$  171.63, 166.89, 149.66, 144.15, 135.45, 131.08, 129.56, 129.46, 129.41, 128.12, 117.70, 112.68, 82.44, 63.96, 52.18, 33.78, 28.15, 19.45. **HRMS (ESI)** calculated  $[\text{M}+\text{H}]^+$  for  $\text{C}_{22}\text{H}_{28}\text{NO}_4$ : 370.2013, found: 370.2018. **FTIR** ( $\text{cm}^{-1}$ ) 2926, 2561, 1723, 1638, 1601, 1502, 1368, 1279, 1215, 1110, 846.



**Methyl 3-(2-(*tert*-butoxy)-1-((3,4-dimethylphenyl)(methyl)amino)-2-oxoethyl)-4-methylbenzoate (3b)**

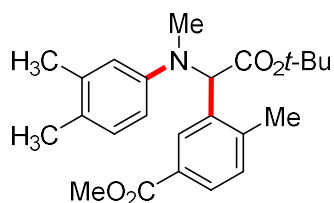

Following the general procedure, treatment of methyl 4-(((2-(*tert*-butoxy)-2-oxoethyl)(methyl)amino)methyl)benzoate **1a** (0.147 g, 0.5 mmol) and 4,5-dimethyl-2-(trimethylsilyl)phenyl trifluoromethanesulfonate **2b** (0.245 g, 0.75 mmol) in the presence of KF (0.087 g, 1.5 mmol) and 18-crown-6 (0.396 g, 1.5 mmol) in THF (2.0 mL) at -10 °C for 5 h, then warming to rt for 12 h followed by flash column chromatography (Pet. ether /EtOAc = 97/03) of the crude reaction mixture using silica gel afforded methyl 3-(2-(*tert*-butoxy)-1-((3,4-dimethylphenyl)(methyl)amino)-2-oxoethyl)-4-methylbenzoate **3b** as a light yellow solid (0.148 g, 74% yield).

**R<sub>f</sub>** (Pet. ether /EtOAc = 95/05): 0.23; **<sup>1</sup>H NMR (400 MHz, CDCl<sub>3</sub>)** δ 7.97-7.94 (m, 2H), 7.29 (d, *J* = 7.8 Hz, 1H), 7.04 (d, *J* = 8.2 Hz, 1H), 6.66 (s, 1H), 6.61 (d, *J* = 8.2 Hz, 1H), 5.44 (s, 1H), 3.91 (s, 3H), 2.70 (s, 3H), 2.26 (s, 6H), 2.20 (s, 3H), 1.52 (s, 9H). **<sup>13</sup>C NMR (100 MHz, CDCl<sub>3</sub>)** δ 171.85, 166.95, 147.96, 144.23, 137.36, 135.65, 131.03, 130.46, 129.57, 129.39, 128.06, 125.66, 114.45, 110.22, 82.27, 64.00, 52.16, 33.93, 28.17, 20.55, 19.48, 18.76. **HRMS (ESI)** calculated [M+H]<sup>+</sup> for C<sub>24</sub>H<sub>32</sub>NO<sub>4</sub>: 398.2326, found: 398.2332. **FTIR (cm<sup>-1</sup>)** 2925, 2859, 1727, 1613, 1571, 1510, 1447, 1368, 1276, 1101, 953, 843.

**Methyl 3-(2-(*tert*-butoxy)-1-((2,3-dihydro-1*H*-inden-5-yl)(methyl)amino)-2-oxoethyl)-4-methylbenzoate (3c)**

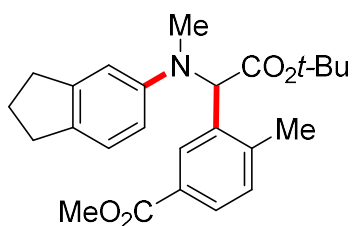

Following the general procedure, treatment of methyl 4-(((2-(*tert*-butoxy)-2-oxoethyl)(methyl)amino)methyl)benzoate **1a** (0.147 g, 0.5 mmol) and 6-(trimethylsilyl)-2,3-dihydro-1*H*-inden-5-yl trifluoromethanesulfonate **2c** (0.254 g, 0.75 mmol) in the presence of KF (0.087 g, 1.5 mmol) and 18-crown-6 (0.396 g, 1.5 mmol) in THF (2.0 mL) at -10 °C for 5 h, then warming to rt for 12 h followed by flash column chromatography (Pet. ether/EtOAc = 97/03) of the crude reaction mixture using silica gel afforded methyl 3-(2-(*tert*-butoxy)-1-((2,3-dihydro-1*H*-inden-5-yl)(methyl)amino)-2-oxoethyl)-4-methylbenzoate **3c** as a colourless sticky liquid (0.143 g, 70% yield).

**R<sub>f</sub>** (Pet. ether/EtOAc = 95/05): 0.59; **<sup>1</sup>H NMR (400 MHz, CDCl<sub>3</sub>)** δ 7.96 (s, 1H), 7.93 (d, *J* = 7.9 Hz, 1H), 7.28 (d, *J* = 7.8 Hz, 1H), 7.12 (d, *J* = 8.2 Hz, 1H), 6.73 (s, 1H), 6.64 (dd, *J* = 8.3, 2.2

Hz, 1H), 5.44 (s, 1H), 3.90 (s, 3H), 2.91-2.82 (m, 4H), 2.70 (s, 3H), 2.26 (s, 3H), 2.06 (p,  $J = 7.4$  Hz, 2H), 1.51 (s, 9H).  $^{13}\text{C}$  NMR (125 MHz,  $\text{CDCl}_3$ )  $\delta$  171.88, 166.98, 148.70, 145.64, 144.24, 135.74, 133.41, 131.05, 129.55, 129.39, 128.07, 124.88, 111.03, 109.13, 82.32, 64.34, 52.19, 34.26, 33.52, 32.04, 28.20, 25.80, 19.54. HRMS (ESI) calculated  $[\text{M}+\text{H}]^+$  for  $\text{C}_{25}\text{H}_{32}\text{NO}_4$ : 410.2326, found: 410.2331. FTIR ( $\text{cm}^{-1}$ ) 2977, 2361, 1727, 1606, 1439, 1367, 1217, 1193, 1153, 1111, 1005.

**Methyl 3-(1-(benzo[d][1,3]dioxol-5-yl(methyl)amino)-2-(*tert*-butoxy)-2-oxoethyl)-4-methylbenzoate (3d)**

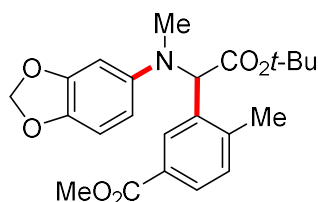

Following the general procedure, treatment of methyl 4-(((2-(*tert*-butoxy)-2-oxoethyl)(methyl)amino)methyl)benzoate **1a** (0.147 g, 0.5 mmol) and 6-(trimethylsilyl)benzo[d][1,3]dioxol-5-yl trifluoromethanesulfonate **2d** (0.257 g, 0.75 mmol) in the presence of KF (0.087 g, 1.5 mmol) and 18-crown-6 (0.396 g, 1.5 mmol) in THF (2.0 mL) at  $-10^\circ\text{C}$  for 5 h, then warming to rt for 12 h followed by flash column chromatography (Pet. ether/EtOAc = 97/03) of the crude reaction mixture using silica gel afforded methyl 3-(1-(benzo[d][1,3]dioxol-5-yl(methyl)amino)-2-(*tert*-butoxy)-2-oxoethyl)-4-methylbenzoate **3d** as a yellow sticky liquid (0.149 g, 72% yield).

$R_f$  (Pet. ether/EtOAc = 95/05): 0.38;  $^1\text{H}$  NMR (400 MHz,  $\text{CDCl}_3$ )  $\delta$  7.96-7.91 (m, 2H), 7.28 (d,  $J = 8.0$  Hz, 1H), 6.73 (d,  $J = 8.3$  Hz, 1H), 6.48 (s, 1H), 6.25 (d,  $J = 8.4$  Hz, 1H), 5.88 (s, 2H), 5.33 (s, 1H), 3.89 (s, 3H), 2.65 (s, 3H), 2.26 (s, 3H), 1.49 (s, 9H).  $^{13}\text{C}$  NMR (100 MHz,  $\text{CDCl}_3$ )  $\delta$  171.60, 166.91, 148.63, 145.97, 144.06, 139.94, 135.49, 131.08, 129.55, 129.43, 128.11, 108.63, 105.32, 100.85, 96.40, 82.41, 65.02, 52.18, 34.76, 28.16, 19.47. HRMS (ESI) calculated  $[\text{M}+\text{H}]^+$  for  $\text{C}_{23}\text{H}_{28}\text{NO}_6$ : 414.1911, found: 414.1917. FTIR ( $\text{cm}^{-1}$ ) 2924, 2361, 1722, 1637, 1499, 1441, 1368, 1279, 1220, 1151, 1111, 979, 938.

**Methyl 3-(2-(*tert*-butoxy)-1-((3,4-difluorophenyl)(methyl)amino)-2-oxoethyl)-4-methylbenzoate(3e)**

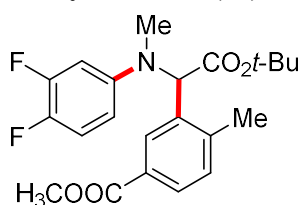

Following the general procedure, treatment of methyl 4-(((2-(*tert*-butoxy)-2-oxoethyl)(methyl)amino)methyl)benzoate **1a** (0.147 g, 0.5 mmol) and 4,5-difluoro-2-(trimethylsilyl)phenyl trifluoromethane

sulfonate **2e** (0.251 g, 0.75 mmol) in the presence of KF (0.087 g, 1.5 mmol) and 18-crown-6 (0.396 g, 1.5 mmol) in THF (2.0 mL) at -10 °C for 5 h, then warming to rt for 12 h followed by flash column chromatography (Pet. ether /EtOAc = 97/03) of the crude reaction mixture using silica gel afforded methyl 3-(2-(*tert*-butoxy)-1-((3,4-difluorophenyl)(methyl)amino)-2-oxoethyl)-4-methylbenzoate **3e** as a light yellow solid (0.075 g, 37% yield).

$R_f$  (Pet. ether /EtOAc = 95/05): 0.26;  $^1\text{H NMR}$  (400 MHz,  $\text{CDCl}_3$ )  $\delta$  7.96-7.93 (m, 2H), 7.30 (d,  $J = 7.8$  Hz, 1H), 7.09-7.02 (m, 1H), 6.62-6.58 (m, 1H), 6.49-6.46 (m, 1H), 5.35 (s, 1H), 3.90 (s, 3H), 2.65 (s, 3H), 2.24 (s, 3H), 1.50 (s, 9H).  $^{13}\text{C NMR}$  (100 MHz,  $\text{CDCl}_3$ )  $\delta$  171.12, 166.80, 150.93 (dd,  $J = 244.6, 13.2$  Hz), 146.89 (d,  $J = 6.8$  Hz), 143.96, 143.27 (dd,  $J = 237.7, 12.9$  Hz), 134.86, 131.22, 129.67 (d,  $J = 9.2$  Hz), 128.31, 117.59 (d,  $J = 17.7$  Hz), 107.83 (dd,  $J = 5.1, 2.9$  Hz), 101.92 (d,  $J = 21.4$  Hz), 82.87, 64.37, 34.19, 52.24, 28.15, 19.37. **HRMS (ESI)** calculated  $[\text{M}+\text{H}]^+$  for  $\text{C}_{22}\text{H}_{26}\text{F}_2\text{NO}_4$ : 406.1824, found: 406.1826. **FTIR** ( $\text{cm}^{-1}$ ) 3066, 2953, 2927, 1727, 1602, 1520, 1440, 1370, 1254, 1214, 1154, 1096, 922, 838.

#### Methyl 3-(2-(*tert*-butoxy)-1-(methyl(naphthalen-2-yl)amino)-2-oxoethyl)-4-methylbenzoate (**3f**)

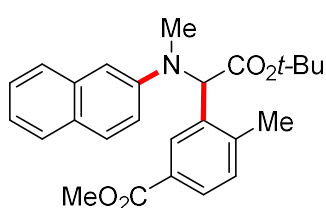

Following the general procedure, treatment of methyl 4-(((2-(*tert*-butoxy)-2-oxoethyl)(methyl)amino)methyl)benzoate **1a** (0.147 g, 0.5 mmol) and 1-(trimethylsilyl)naphthalen-2-yl trifluoromethane sulfonate **2f** (0.261 g, 0.75 mmol) in the presence of KF (0.087 g, 1.5 mmol) and 18-crown-6 (0.396 g, 1.5 mmol) in THF (2.0 mL) at

-10°C for 5 h, then warming to rt for 12 h followed by flash column chromatography (Pet. ether/EtOAc = 97/03) of the crude reaction mixture using silica gel afforded methyl 3-(2-(*tert*-butoxy)-1-(methyl(naphthalen-2-yl)amino)-2-oxoethyl)-4-methylbenzoate **3f** as a brown solid (0.138 g, 66% yield).

Following the general procedure, using 3-(trimethylsilyl)naphthalen-2-yl trifluoromethane sulfonate **2g** (0.261 g, 0.75 mmol) as the aryne precursor, the product methyl 3-(2-(*tert*-butoxy)-1-(methyl(naphthalen-2-yl)amino)-2-oxoethyl)-4-methylbenzoate **3f** as a brown solid (0.130 g, 62% yield).

$R_f$  (Pet. ether/EtOAc = 95/05): 0.59;  $^1\text{H NMR}$  (400 MHz,  $\text{CDCl}_3$ )  $\delta$  8.01 (s, 1H), 7.95 (dd,  $J = 7.9, 1.6$  Hz, 1H), 7.75 (d,  $J = 9.1$  Hz, 1H), 7.69 (dd,  $J = 12.6, 8.2$  Hz, 2H), 7.37 (t,  $J = 7.1$  Hz, 1H), 7.28 (d,  $J = 7.9$  Hz, 1H), 7.24-7.21 (m, 2H), 7.05 (d,  $J = 2.4$  Hz, 1H), 5.62 (s, 1H), 3.89 (s,

3H), 2.82 (s, 3H), 2.23 (s, 3H), 1.51 (s, 9H).  $^{13}\text{C}$  NMR (100 MHz,  $\text{CDCl}_3$ )  $\delta$  171.60, 166.87, 147.57, 144.17, 135.33, 135.05, 131.14, 129.59, 129.53, 129.18, 128.17, 127.54, 127.42, 126.48, 126.45, 122.54, 115.80, 107.03, 82.54, 64.23, 52.18, 34.10, 28.16, 19.46. HRMS (ESI) calculated  $[\text{M}+\text{H}]^+$  for  $\text{C}_{26}\text{H}_{30}\text{NO}_4$ : 420.2169, found: 420.2175. FTIR ( $\text{cm}^{-1}$ ) 2925, 1926, 1724, 1606, 1438, 1367, 1218, 1153, 1110, 922.

**Methyl 3-(2-(*tert*-butoxy)-1-((3-methoxyphenyl)(methyl)amino)-2-oxoethyl)-4-methylbenzoate (3g)**

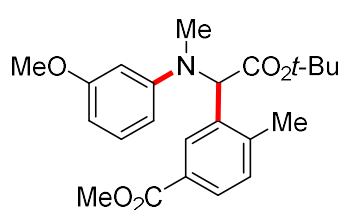

Following the general procedure, treatment of methyl 4-(((2-(*tert*-butoxy)-2-oxoethyl)(methyl)amino)methyl)benzoate **1a** (0.147 g, 0.5 mmol) and 3-methoxy-2-(trimethylsilyl)phenyl trifluoromethanesulfonate **2h** (0.246 g, 0.75 mmol) in the presence of KF (0.087 g, 1.5 mmol) and 18-crown-6 (0.396 g, 1.5 mmol) in THF (2.0 mL) at  $-10\text{ }^\circ\text{C}$  for 5 h, then warming to rt for 12 h followed by flash column chromatography (Pet. ether /EtOAc = 97/03) of the crude reaction mixture using silica gel afforded methyl 3-(2-(*tert*-butoxy)-1-((3-methoxyphenyl)(methyl)amino)-2-oxoethyl)-4-methylbenzoate **3g** as a light yellow oil (0.075g, 38% yield).

$R_f$  (Pet. ether /EtOAc = 95/05): 0.20;  $^1\text{H}$  NMR (400 MHz,  $\text{CDCl}_3$ )  $\delta$  7.95-7.93 (m, 2H), 7.29 (d,  $J = 7.8$  Hz, 1H), 7.21-7.17 (m, 1H), 6.46-6.44 (m, 1H), 6.38-6.36 (m, 2H), 5.45 (s, 1H), 3.90 (s, 3H), 3.81 (s, 3H), 2.69 (s, 3H), 2.23 (s, 3H), 1.51 (s, 9H).  $^{13}\text{C}$  NMR (100 MHz,  $\text{CDCl}_3$ )  $\delta$  171.58, 166.91, 160.96, 151.10, 144.19, 135.41, 131.11, 130.13, 129.57, 129.51, 128.16, 105.68, 102.48, 99.44, 82.49, 64.00, 55.27, 52.20, 33.90, 28.19, 19.47. HRMS (ESI) calculated  $[\text{M}+\text{H}]^+$  for  $\text{C}_{23}\text{H}_{30}\text{NO}_5$ : 400.2118, found: 400.2125. FTIR ( $\text{cm}^{-1}$ ) 3658, 2926, 2583, 1724, 1608, 1579, 1498, 1368, 1301, 1255, 1252, 1105, 997, 837.

**Methyl 3-(2-(*tert*-butoxy)-1-(methyl(*p*-tolyl)amino)-2-oxoethyl)-4-methylbenzoate (3h) and Methyl 3-(2-(*tert*-butoxy)-1-(methyl(*m*-tolyl)amino)-2-oxoethyl)-4-methylbenzoate (3h')**

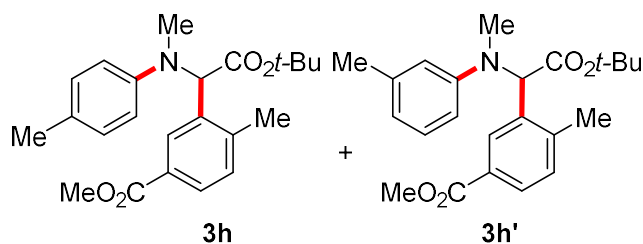

Following the general procedure, treatment of methyl 4-(((2-(*tert*-butoxy)-2-oxoethyl)(methyl)amino)methyl)benzoate **1a** (0.147 g, 0.5 mmol) and 4-methyl-2-

(trimethylsilyl)phenyl trifluoromethanesulfonate **2i** (0.235 g, 0.75mmol) in the presence of KF (0.087 g, 1.5 mmol) and 18-crown-6 (0.396 g, 1.5 mmol) in THF (2.0 mL) at -10°C for 5 h, then warming to rt for 12 h followed by flash column chromatography (Pet. ether/EtOAc = 97/03) of the crude reaction mixture using silica gel afforded inseparable mixture of methyl 3-(2-(*tert*-butoxy)-1-(methyl(*p*-tolyl)amino)-2-oxoethyl)-4-methylbenzoate **3h** and methyl 3-(2-(*tert*-butoxy)-1-(methyl(*m*-tolyl)amino)-2-oxoethyl)-4-methylbenzoate **3h'** as a yellow sticky liquid (0.113 g, 59% yield).

**R<sub>f</sub>** (Pet. ether/EtOAc = 95/05): 0.57; **<sup>1</sup>H NMR (400 MHz, CDCl<sub>3</sub>, major isomer)** δ 7.94-7.98 (m, 2H), 7.29 (d, *J* = 7.8 Hz, 2H), 7.18 (t, *J* = 7.4 Hz, 1H), 6.65-6.62 (m, 2H), 5.48 (s, 1H), 3.91 (s, 3H), 2.71 (s, 3H), 2.35 (s, 3H), 2.25 (s, 3H), 1.52 (s, 9H). **<sup>1</sup>H NMR (400 MHz, CDCl<sub>3</sub>, minor isomer)** δ 7.94-7.98 (m, 2H), 7.10 (d, *J* = 7.2 Hz, 2H), 6.77 (d, *J* = 7.2 Hz, 1H), 6.65-6.62 (m, 2H), 5.46 (s, 1H), 3.91 (s, 3H), 2.71 (s, 3H), 2.28 (s, 3H), 2.25 (s, 3H), 1.52 (s, 9H). **<sup>13</sup>C NMR (100 MHz, CDCl<sub>3</sub>, major isomer)** δ 171.72, 166.89, 149.77, 144.17, 135.52, 129.93, 129.57, 129.23, 128.13, 128.09, 113.55, 112.89, 82.35, 64.00, 52.14, 33.85, 28.16, 22.07, 19.44. **<sup>13</sup>C NMR (100 MHz, CDCl<sub>3</sub>, minor isomer (representative peaks))** δ 171.69, 166.91, 147.58, 139.03, 135.61, 118.69, 109.90, 82.31, 64.15, 52.14, 33.92, 20.37. **HRMS (ESI)** calculated [M+H]<sup>+</sup> for C<sub>23</sub>H<sub>30</sub>NO<sub>4</sub>: 384.2169, found: 384.2175. **FTIR (cm<sup>-1</sup>)** 2952, 2103, 1724, 1608, 1438, 1279, 1217, 1153, 1110, 1009, 921.

**Methyl 3-(2-(*tert*-butoxy)-1-((4-fluorophenyl)(methyl)amino)-2-oxoethyl)-4-methylbenzoate (3i) and Methyl 3-(2-(*tert*-butoxy)-1-((3-fluorophenyl)(methyl)amino)-2-oxoethyl)-4-methylbenzoate(3i')**

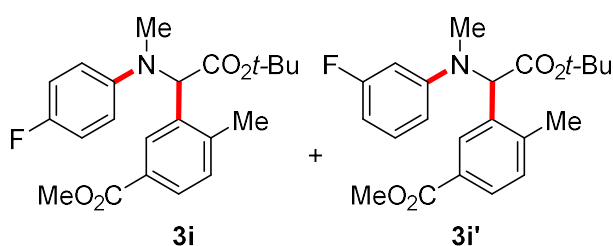

Following the general procedure, treatment of methyl 4-(((2-(*tert*-butoxy)-2-oxoethyl)(methyl)amino)methyl)benzoate **1a** (0.147 g, 0.5 mmol) and 5-fluoro-2-(trimethylsilyl)phenyl trifluoromethane sulfonate **2j** (0.237 g, 0.75mmol) in the

presence of KF (0.087 g, 1.5 mmol) and 18-crown-6 (0.396 g, 1.5 mmol) in THF (2.0 mL) at -10°C for 5 h, then warming to rt for 12 h followed by flash column chromatography (Pet. ether/EtOAc = 97/03) of the crude reaction mixture using silica gel afforded inseparable mixture of methyl 3-(2-(*tert*-butoxy)-1-((4-fluorophenyl)(methyl)amino)-2-oxoethyl)-4-methylbenzoate

**3i** and methyl 3-(2-(*tert*-butoxy)-1-((3-fluorophenyl)(methyl)amino)-2-oxoethyl)-4-methylbenzoate **3i'** as a yellow sticky liquid (0.077 g, 40% yield).

**R<sub>f</sub>** (Pet. ether/EtOAc = 95/05): 0.44; **<sup>1</sup>H NMR (400 MHz, CDCl<sub>3</sub>, major isomer)** δ 7.90-7.88 (m, 2H), 7.24 (d, *J* = 7.5 Hz, 1H), 6.92 (t, *J* = 8.8 Hz, 2H), 6.73-6.71 (m, 2H), 5.34 (s, 1H), 3.84 (s, 3H), 2.62 (s, 3H), 2.20 (s, 3H), 1.43 (s, 9H). **<sup>1</sup>H NMR (400 MHz, CDCl<sub>3</sub>, minor isomer)** δ 7.90-7.88 (m, 2H), 7.24 (d, *J* = 7.5 Hz, 1H), 7.18-7.12 (m, 1H), 6.53 (d, *J* = 8.4 Hz, 1H), 6.47-6.41 (m, 2H), 5.38 (s, 1H), 3.84 (s, 3H), 2.62 (s, 3H), 2.17 (s, 3H), 1.46 (s, 9H). **<sup>13</sup>C NMR (100 MHz, CDCl<sub>3</sub>, major isomer)** δ 171.48, 166.88, 156.08 (d, *J* = 235.2 Hz), 146.37, 144.03, 135.32, 131.12, 129.60, 129.51, 128.18, 115.77 (d, *J* = 22.1 Hz), 114.09 (d, *J* = 7.4 Hz), 82.53, 64.70, 52.18, 34.37, 28.14, 19.42. **<sup>13</sup>C NMR (100 MHz, CDCl<sub>3</sub>, minor isomer (representative peaks))** δ 171.21, 166.81, 164.76 (d, *J* = 242.2 Hz), 151.39 (d, *J* = 10.5 Hz), 134.96, 131.18, 130.48 (d, *J* = 10.2 Hz), 129.65, 128.26, 108.11 (d, *J* = 2.2 Hz), 104.20 (d, *J* = 21.2 Hz), 99.78 (d, *J* = 26.1 Hz), 82.76, 63.94, 52.20, 33.88, 28.14, 19.37. **HRMS (ESI)** calculated [M+H]<sup>+</sup> for C<sub>22</sub>H<sub>27</sub>FNO<sub>4</sub>: 388.1919, found: 388.1924. **FTIR (cm<sup>-1</sup>)** 2926, 2361, 1725, 1606, 1438, 1367, 1278, 1218, 1110, 843.

#### ***tert*-Butyl 2-(5-cyano-2-methylphenyl)-2-(methyl(phenyl)amino)acetate (**3j**)**

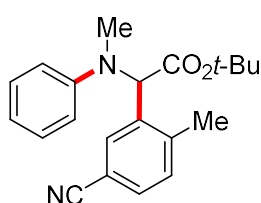

Following the general procedure, treatment of *tert*-butyl *N*-(4-cyanobenzyl)-*N*-methylglycinate **1j** (0.130 g, 0.5 mmol) and 2-(trimethylsilyl)phenyl trifluoromethanesulfonate **2a** (0.223 g, 182 μL, 0.75 mmol) in the presence of KF (0.087 g, 1.5 mmol) and 18-crown-6 (0.396 g, 1.5 mmol) in THF (2.0 mL) at -10 °C for 5 h, then warming to rt for 12 h followed by flash column chromatography (Pet. ether /EtOAc = 97/03) of the crude reaction mixture using silica gel afforded *tert*-butyl 2-(5-cyano-2-methylphenyl)-2-(methyl(phenyl)amino)acetate **3j** as a colourless sticky liquid (0.101 g, 60% yield).

**R<sub>f</sub>** (Pet. ether /EtOAc = 95/05): 0.23; **<sup>1</sup>H NMR (400 MHz, CDCl<sub>3</sub>)** δ 7.56-7.54 (m, 2H), 7.34-7.26 (m, 3H), 6.83-6.80 (m, 3H), 5.45 (s, 1H), 2.74 (s, 3H), 2.28 (s, 3H), 1.47 (s, 9H). **<sup>13</sup>C NMR (100 MHz, CDCl<sub>3</sub>)** δ 170.66, 149.40, 144.23, 136.71, 131.85, 131.80, 131.54, 129.41, 118.88, 118.23, 113.04, 110.09, 82.85, 64.00, 34.19, 28.10, 19.64. **HRMS (ESI)** calculated [M+H]<sup>+</sup> for C<sub>21</sub>H<sub>25</sub>N<sub>2</sub>O<sub>2</sub>: 337.1911, found: 337.1919. **FTIR (cm<sup>-1</sup>)** 3431, 3064, 2977, 2929, 2229, 1733, 1599, 1501, 1367, 1290, 1214, 1154, 1109, 994, 832.

### *tert*-Butyl 2-(methyl(phenyl)amino)-2-(2-methyl-5-(trifluoromethyl)phenyl)acetate (**3k**)

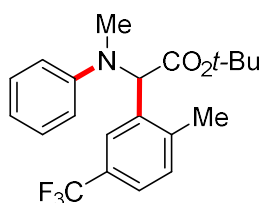

Following the general procedure, treatment of *tert*-butyl *N*-methyl-*N*-(4-(trifluoromethyl)benzyl)glycinate **1k** (0.152 g, 0.5 mmol) and 2-(trimethylsilyl)phenyl trifluoromethanesulfonate **2a** (0.223 g, 182  $\mu$ L, 0.75 mmol) in the presence of KF (0.087 g, 1.5 mmol) and 18-crown-6 (0.396 g, 1.5 mmol) in THF (2.0 mL) at  $-10^{\circ}\text{C}$  for 5 h, then warming to rt for 12 h followed by flash column chromatography (Pet. ether/EtOAc = 98/02) of the crude reaction mixture using silica gel afforded *tert*-butyl 2-(methyl(phenyl)amino)-2-(2-methyl-5-(trifluoromethyl)phenyl)acetate **3k** as a yellow sticky liquid (0.113 g, 61% yield).

$R_f$  (Pet. ether/EtOAc = 97/03): 0.55;  $^1\text{H NMR}$  (400 MHz,  $\text{CDCl}_3$ )  $\delta$  7.54-7.52 (m, 2H), 7.35-7.27 (m, 3H), 6.85-6.80 (m, 3H), 5.48 (s, 1H), 2.72 (s, 3H), 2.25 (s, 3H), 1.48 (s, 9H).  $^{13}\text{C NMR}$  (100 MHz,  $\text{CDCl}_3$ )  $\delta$  171.34, 149.68, 142.79, 135.99, 131.38, 129.48, 128.59 (q,  $J = 32$  Hz), 125.13, 124.32 (q,  $J = 272$  Hz), 118.02, 112.95, 82.64, 64.05, 33.98, 28.15, 19.30. **HRMS (ESI)** calculated  $[\text{M}+\text{H}]^+$  for  $\text{C}_{21}\text{H}_{25}\text{F}_3\text{NO}_2$ : 380.1832, found: 380.1837. **FTIR** ( $\text{cm}^{-1}$ ) 2933, 2361, 1729, 1599, 1501, 1368, 1327, 1290, 1212, 1160, 1071, 987, 914.

### *tert*-Butyl 2-(methyl(phenyl)amino)-2-(2-methyl-5-nitrophenyl)acetate (**3l**)

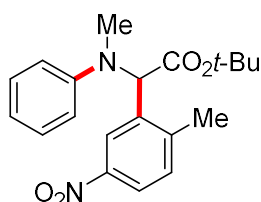

Following the general procedure, treatment of *tert*-butyl *N*-methyl-*N*-(4-nitrobenzyl)glycinate **1l** (0.140 g, 0.5 mmol) and 2-(trimethylsilyl)phenyl trifluoromethanesulfonate **2a** (0.223 g, 182  $\mu$ L, 0.75 mmol) in the presence of KF (0.087 g, 1.5 mmol) and 18-crown-6 (0.396 g, 1.5 mmol) in THF (2.0 mL) at  $-10^{\circ}\text{C}$  for 5 h, then warming to rt for 12 h followed by flash column chromatography (Pet. ether /EtOAc = 97/03) of the crude reaction mixture using silica gel afforded methyl *tert*-butyl 2-(methyl(phenyl)amino)-2-(2-methyl-5-nitrophenyl)acetate **3l** as a colourless sticky liquid (0.090 g, 51% yield).

$R_f$  (Pet. ether /EtOAc = 95/05): 0.37;  $^1\text{H NMR}$  (400 MHz,  $\text{CDCl}_3$ )  $\delta$  8.19-7.18 (m, 1H), 8.15-8.13 (m, 1H), 7.39 (d,  $J = 8.3$  Hz, 1H), 7.32-7.28 (m, 2H), 6.86-6.81 (m, 3H), 5.50 (s, 1H), 2.77 (s, 3H), 2.32 (s, 3H), 1.52 (s, 9H).  $^{13}\text{C NMR}$  (100 MHz,  $\text{CDCl}_3$ )  $\delta$  170.66, 149.46, 146.49, 146.39, 136.97, 131.76, 129.48, 123.28, 123.22, 118.29, 113.06, 83.04, 64.16, 34.21, 28.14, 19.56. **HRMS (ESI)** calculated  $[\text{M}+\text{H}]^+$  for  $\text{C}_{20}\text{H}_{25}\text{N}_2\text{O}_4$ : 357.1809, found: 357.1810. **FTIR** ( $\text{cm}^{-1}$ ) 3093, 2976, 2930, 2821, 1734, 1598, 1522, 1454, 1345, 1287, 1212, 1154, 991, 837.

***tert*-Butyl 2-(methyl(phenyl)amino)-2-(2-methyl-4-(trifluoromethyl)phenyl)acetate (3m)**

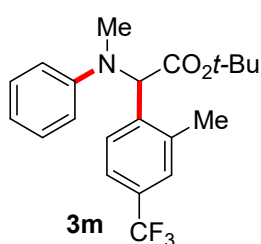

Following the general procedure, treatment of *tert*-butyl *N*-methyl-*N*-(3-(trifluoromethyl)benzyl)glycinate **1m** (0.152 g, 0.5 mmol) and 2-(trimethylsilyl)phenyl trifluoromethanesulfonate **2a** (0.223 g, 182 μL, 0.75 mmol) in the presence of KF (0.087 g, 1.5 mmol) and 18-crown-6 (0.396 g, 1.5 mmol) in THF (2.0 mL) at -10°C for 5 h, then warming to rt for 12 h followed by flash column chromatography (Pet. ether/EtOAc = 98/02) of the crude reaction mixture using silica gel afforded *tert*-butyl 2-(methyl(phenyl)amino)-2-(2-methyl-4-(trifluoromethyl)phenyl)acetate **3m** as a yellow solid (0.104 g, 55% yield).

$R_f$  (Pet. ether/EtOAc = 97/03): 0.55;  $^1\text{H NMR}$  (400 MHz,  $\text{CDCl}_3$ )  $\delta$  7.50-7.48 (m, 2H), 7.36 (d,  $J = 7.9$  Hz, 1H), 7.30-7.26 (m, 2H), 6.84-6.79 (m, 3H), 5.48 (s, 1H), 2.72 (s, 3H), 2.26 (s, 3H), 1.47 (s, 9H).  $^{13}\text{C NMR}$  (100 MHz,  $\text{CDCl}_3$ )  $\delta$  171.19, 149.49, 139.29, 138.85, 129.31, 129.17, 128.75, 128.56, 128.44,  $\delta$  127.54 (q,  $J = 3.6$  Hz), 122.84 (q,  $J = 4.0$  Hz), 121.25, 120.44, 117.87, 112.79, 82.39, 63.91, 33.93, 28.03, 19.16. **HRMS (ESI)** calculated  $[\text{M}+\text{H}]^+$  for  $\text{C}_{21}\text{H}_{25}\text{F}_3\text{NO}_2$ : 380.1832, found: 380.1837. **FTIR** ( $\text{cm}^{-1}$ ) 2931, 2361, 1734, 1640, 1600, 1502, 1452, 1415, 1368, 1331, 1286, 1215, 1160, 993.

***tert*-Butyl 2-(methyl(phenyl)amino)-2-(2-methyl-3-nitrophenyl)acetate (3n)**

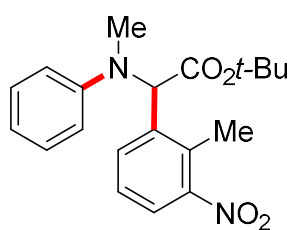

Following the general procedure, treatment of *tert*-butyl *N*-methyl-*N*-(2-nitrobenzyl)glycinate **1n** (0.140 g, 0.5 mmol) and 2-(trimethylsilyl)phenyl trifluoromethanesulfonate **2a** (0.223 g, 182 μL, 0.75 mmol) in the presence of KF (0.087 g, 1.5 mmol) and 18-crown-6 (0.396 g, 1.5 mmol) in THF (2.0 mL) at -10°C for 5 h, then warming to rt for 12 h followed by flash column chromatography (Pet. ether/EtOAc = 95/05) of the crude reaction mixture using silica gel afforded *tert*-butyl 2-(methyl(phenyl)amino)-2-(2-methyl-3-nitrophenyl)acetate **3n** as a colourless sticky liquid (0.100 g, 56% yield).

$R_f$  (Pet. ether/EtOAc = 95/05): 0.29;  $^1\text{H NMR}$  (400 MHz,  $\text{CDCl}_3$ )  $\delta$  7.75 (d,  $J = 8.0$  Hz, 1H), 7.49 (d,  $J = 7.6$  Hz, 1H), 7.37 (t,  $J = 7.9$  Hz, 1H), 7.29 (t,  $J = 8.1$  Hz, 2H), 6.83 (d,  $J = 8.1$  Hz, 3H), 5.51 (s, 1H), 2.77 (s, 3H), 2.30 (s, 3H), 1.47 (s, 9H).  $^{13}\text{C NMR}$  (100 MHz,  $\text{CDCl}_3$ )  $\delta$  170.95, 151.94, 149.33, 137.98, 132.57, 132.05, 129.51, 126.58, 123.85, 118.34, 113.06, 82.81,



64.28, 34.21, 28.15, 14.45. **HRMS (ESI)** calculated  $[M+H]^+$  for  $C_{20}H_{25}N_2O_4$ : 357.1809, found: 357.1814. **FTIR (cm<sup>-1</sup>)** 2924, 2361, 1721, 1599, 1499, 1439, 1262, 1220, 1127, 1003, 951.

### ***tert*-Butyl 2-(methyl(phenyl)amino)-2-(2-methylpyridin-3-yl)acetate (3o)**

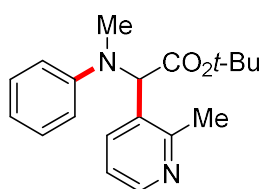

Following the general procedure, treatment of *tert*-butyl *N*-methyl-*N*-(pyridin-2-ylmethyl)glycinate **1o** (118 g, 0.5 mmol) and 2-(trimethylsilyl)phenyl trifluoromethanesulfonate **2a** (0.223 g, 182  $\mu$ L, 0.75 mmol) in the presence of KF (0.087 g, 1.5 mmol) and 18-crown-6 (0.396 g, 1.5 mmol) in THF (2.0 mL) at -10 °C for 5 h, then warming to rt for 12 h followed by flash column chromatography (Pet. ether /EtOAc = 97/03) of the crude reaction mixture using silica gel afforded *tert*-butyl 2-(methyl(phenyl)amino)-2-(2-methylpyridin-3-yl)acetate **3o** as a colourless sticky liquid (0.042 g, 27% yield).

**R<sub>f</sub>** (Pet. ether /EtOAc = 95/05): 0.27; **<sup>1</sup>H NMR (400 MHz, CDCl<sub>3</sub>)**  $\delta$  8.48-8.47 (m, 1H), 7.56 (d,  $J$  = 7.8 Hz, 1H), 7.28-7.24 (m, 2H), 7.19-7.16 (m, 1H), 6.82-6.77 (m, 3H), 5.45 (s, 1H), 2.73 (s, 3H), 2.44 (s, 3H), 1.44 (s, 9H). **<sup>13</sup>C NMR (100 MHz, CDCl<sub>3</sub>)**  $\delta$  170.86, 158.67, 149.55, 148.21, 136.13, 130.87, 129.44, 121.31, 118.20, 113.12, 82.66, 63.92, 34.25, 28.15, 22.01. **HRMS (ESI)** calculated  $[M+H]^+$  for  $C_{19}H_{25}N_2O_2$ : 313.1911, found: 313.1913. **FTIR (cm<sup>-1</sup>)** 3060, 2975, 2926, 2853, 2820, 1733, 1598, 1502, 1443, 1367, 1285, 1153, 946, 840.

### **Methyl 3-(2-(*tert*-butoxy)-1-(butyl(phenyl)amino)-2-oxoethyl)-4-methylbenzoate (3p)**

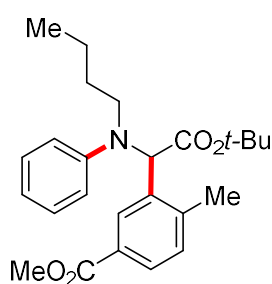

Following the general procedure, treatment of methyl 4-(((2-(*tert*-butoxy)-2-oxoethyl)(butyl)amino)methyl)benzoate **1p** (0.168 g, 0.5 mmol) and 2-(trimethylsilyl)phenyl trifluoromethanesulfonate **2a** (0.223 g, 182  $\mu$ L, 0.75 mmol) in the presence of KF (0.087 g, 1.5 mmol) and 18-crown-6 (0.396 g, 1.5 mmol) in THF (2.0 mL) at -10 °C for 5 h, then warming to rt for 12 h followed by flash column chromatography (Pet. ether/EtOAc = 97/03) of the crude reaction mixture using silica gel afforded methyl 3-(2-(*tert*-butoxy)-1-(butyl(phenyl)amino)-2-oxoethyl)-4-methylbenzoate **3p** as a colourless sticky liquid (0.123 g, 60% yield).

**R<sub>f</sub>** (Pet. ether/EtOAc = 95/05): 0.58; **<sup>1</sup>H NMR (400 MHz, CDCl<sub>3</sub>)** 7.95 (d,  $J$  = 7.8 Hz, 1H), 7.29-7.24 (m, 4H), 6.80-6.76 (m, 3H), 5.44 (s, 1H), 3.91 (s, 3H), 3.27-3.19 (m, 1H), 3.14-3.07 (m,

1H), 2.31 (s, 3H), 1.49 (s, 9H), 1.07-0.94 (m, 2H), 0.90-0.84 (m, 2H), 0.67 (t,  $J = 7.4$  Hz, 3H).  $^{13}\text{C}$  NMR (100 MHz,  $\text{CDCl}_3$ )  $\delta$  171.70, 166.94, 149.06, 144.48, 135.63, 130.84, 129.82, 129.55, 129.42, 128.12, 117.65, 113.09, 82.38, 63.60, 52.21, 47.94, 30.49, 28.17, 20.04, 19.48, 13.75. HRMS (ESI) calculated  $[\text{M}+\text{H}]^+$  for  $\text{C}_{25}\text{H}_{34}\text{NO}_4$ : 412.2482, found: 412.2488. FTIR ( $\text{cm}^{-1}$ ) 2978, 2361, 1725, 1615, 1512, 1438, 1274, 1228, 1154, 1108, 1005, 893.

### Methyl 3-(2-(*tert*-butoxy)-1-(dodecyl(phenyl)amino)-2-oxoethyl)-4-methylbenzoate (3q)

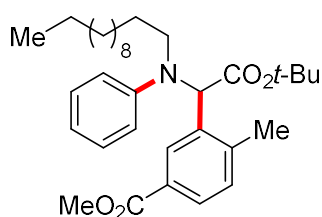

Following the general procedure, treatment of methyl methyl 4-(((2-(*tert*-butoxy)-2-oxoethyl)(dodecyl)amino)methyl)benzoate **1q** (0.239 g, 0.5 mmol) and 2-(trimethylsilyl)phenyl trifluoromethanesulfonate **2a** (0.223 g, 182  $\mu\text{L}$ , 0.75 mmol) in the presence of KF (0.087 g, 1.5 mmol) and 18-crown-6 (0.396 g, 1.5 mmol) in THF (2.0 mL) at  $-10^\circ\text{C}$  for 5 h, then warming to rt for 12 h followed by flash column chromatography (Pet. ether /EtOAc = 97/03) of the crude reaction mixture using silica gel afforded methyl 3-(2-(*tert*-butoxy)-1-(dodecyl(phenyl)amino)-2-oxoethyl)-4-methylbenzoate **3q** as a colourless oil (0.150 g, 54% yield).

$R_f$  (Pet. ether /EtOAc = 95/05): 0.40;  $^1\text{H}$  NMR (400 MHz,  $\text{CDCl}_3$ )  $\delta$  7.99-7.94 (m, 2H), 7.29-7.24 (m, 3H), 6.80-6.76 (m, 3H), 5.44 (s, 1H), 3.91 (s, 3H), 3.27-3.19 (m, 1H), 3.14-3.06 (m, 1H), 2.31 (s, 3H), 1.49 (s, 9H), 1.33-0.87 (m, 23H).  $^{13}\text{C}$  NMR (100 MHz,  $\text{CDCl}_3$ )  $\delta$  171.69, 166.90, 149.05, 144.49, 135.64, 130.82, 129.83, 129.55, 129.42, 128.12, 117.60, 112.99, 82.37, 63.49, 52.19, 48.24, 32.06, 29.76, 29.65, 29.59, 29.48, 29.15, 28.25, 28.16, 26.82, 22.83, 19.49, 14.26. HRMS (ESI) calculated  $[\text{M}+\text{H}]^+$  for  $\text{C}_{33}\text{H}_{50}\text{NO}_4$ : 524.3734, found: 524.3741. FTIR ( $\text{cm}^{-1}$ ) 3579, 2925, 2852, 1725, 1599, 1502, 1437, 1367, 1277, 1150, 1223, 1017, 951, 844.

### Methyl 3-(cyano(methyl(phenyl)amino)methyl)-4-methylbenzoate (3r)

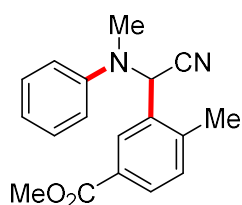

Following the general procedure, treatment of methyl 4-(((cyanomethyl)(methyl)amino)methyl)benzoate **1r** (0.109 g, 0.5 mmol) and 2-(trimethylsilyl)phenyl trifluoromethanesulfonate **2a** (0.223 g, 182  $\mu\text{L}$ , 0.75 mmol) in the presence of KF (0.087 g, 1.5 mmol) and 18-crown-6 (0.396 g, 1.5 mmol) in THF (2.0 mL) at  $-10^\circ\text{C}$  for 5 h, then warming to rt for 12 h followed by flash column chromatography (Pet. ether/EtOAc = 97/03) of the crude reaction mixture using

silica gel afforded methyl 3-(cyano(methyl(phenyl)amino)methyl)-4-methylbenzoate **3r** as a yellow sticky liquid (0.103 g, 70% yield).

$R_f$  (Pet. ether/EtOAc = 95/05): 0.50;  $^1\text{H NMR}$  (400 MHz,  $\text{CDCl}_3$ )  $\delta$  8.34 (s, 1H), 8.03 (d,  $J = 7.9$  Hz, 1H), 7.38-7.33 (m, 3H), 7.08 (d,  $J = 8.2$  Hz, 2H), 7.00 (t,  $J = 7.3$  Hz, 1H), 5.86 (s, 1H), 3.94 (s, 3H), 2.69 (s, 3H), 2.39 (s, 3H).  $^{13}\text{C NMR}$  (100 MHz,  $\text{CDCl}_3$ )  $\delta$  166.44, 148.77, 142.75, 131.69, 131.64, 130.73, 129.64, 129.62, 128.60, 121.43, 116.61, 116.04, 56.34, 52.32, 34.38, 19.37. **HRMS (ESI)** calculated  $[\text{M}+\text{Na}]^+$  for  $\text{C}_{18}\text{H}_{18}\text{N}_2\text{O}_2\text{Na}$ : 317.1260, found: 317.1266. **FTIR** ( $\text{cm}^{-1}$ ) 2924, 2361, 1721, 1600, 1499, 1439, 1262, 1127, 1032, 952.

### Methyl 3-(2-(benzyloxy)-1-(methyl(phenyl)amino)-2-oxoethyl)-4-methylbenzoate (**3s**)

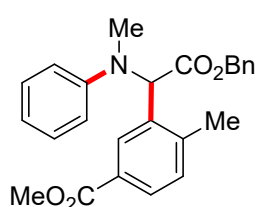

Following the general procedure, treatment of methyl 4-(((2-(benzyloxy)-2-oxoethyl)(methyl)amino)methyl)benzoate **1s** (0.098 g, 0.3 mmol) and 2-(trimethylsilyl)phenyl trifluoromethanesulfonate **2a** (0.134 g, 109  $\mu\text{L}$ , 0.45 mmol) in the presence of KF (0.052 g, 0.9 mmol) and 18-crown-6 (0.238 g, 0.9 mmol) in THF (1.2 mL) at  $-10^\circ\text{C}$  for 5 h, then warming to rt for 12 h followed by flash column chromatography (Pet. ether /EtOAc = 97/03) of the crude reaction mixture using silica gel afforded methyl 3-(2-(benzyloxy)-1-(methyl(phenyl)amino)-2-oxoethyl)-4-methylbenzoate **3s** as a light yellow oil (0.037g, 30% yield).

$R_f$  (Pet. ether /EtOAc = 95/05): 0.23;  $^1\text{H NMR}$  (400 MHz,  $\text{CDCl}_3$ )  $\delta$  7.95 (d,  $J = 7.8$  Hz, 1H), 7.83 (s, 1H), 7.31-7.26 (m, 8H), 6.85-6.80 (m, 3H), 5.70 (s, 1H), 5.28 (s, 2H), 3.89 (s, 3H), 2.73 (s, 3H), 2.25 (s, 3H).  $^{13}\text{C NMR}$  (100 MHz,  $\text{CDCl}_3$ )  $\delta$  172.12, 166.81, 149.52, 144.01, 135.52, 134.75, 131.24, 129.83, 129.53, 129.45, 128.68, 128.59, 128.46, 128.32, 118.17, 113.05, 67.17, 63.56, 52.24, 33.82, 19.52. **HRMS (ESI)** calculated  $[\text{M}+\text{H}]^+$  for  $\text{C}_{25}\text{H}_{26}\text{NO}_4$ : 404.1856, found: 404.1860. **FTIR** ( $\text{cm}^{-1}$ ) 3062, 3033, 2954, 2926, 2855, 1724, 1600, 1501, 1442, 1370, 1278, 1171, 1110, 997.

### Methyl 3-(2-ethoxy-1-(methyl(phenyl)amino)-2-oxoethyl)-4-methylbenzoate (**3t**)

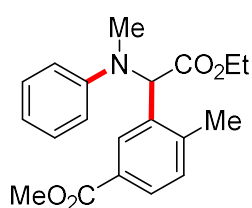

Following the general procedure, treatment of methyl methyl 4-(((2-ethoxy-2-oxoethyl)(methyl)amino)methyl)benzoate **1t** (0.133 g, 0.5 mmol) and 2-(trimethylsilyl)phenyl trifluoromethanesulfonate **2a** (0.223 g, 182 $\mu\text{L}$ , 0.75mmol) in the presence of KF (0.087 g, 1.5 mmol) and 18-

crown-6 (0.396 g, 1.5 mmol) in THF (2.0 mL) at -10°C for 5 h, then warming to rt for 12 h followed by flash column chromatography (Pet. ether/EtOAc = 97/03) of the crude reaction mixture using silica gel afforded methyl 3-(2-ethoxy-1-(methyl(phenyl)amino)-2-oxoethyl)-4-methylbenzoate **3t** as a colourless sticky liquid (0.082 g, 48% yield).

**R<sub>f</sub>** (Pet. ether/EtOAc = 95/05): 0.57; **<sup>1</sup>H NMR (400 MHz, CDCl<sub>3</sub>)** δ 7.95 (dd, *J* = 7.9, 1.5 Hz, 1H), 7.87 (s, 1H), 7.31-7.26 (m, 3H), 6.85 (d, *J* = 8.3 Hz, 2H), 6.81 (t, *J* = 7.3 Hz, 1H), 5.63 (s, 1H), 4.31 (q, *J* = 7.1 Hz, 2H), 3.90 (s, 3H), 2.74 (s, 3H), 2.26 (s, 3H), 1.29 (t, *J* = 7.1 Hz, 3H). **<sup>13</sup>C NMR (100 MHz, CDCl<sub>3</sub>)** δ 172.18, 166.82, 149.52, 144.02, 135.00, 131.17, 129.67, 129.47, 129.42, 128.24, 117.99, 112.86, 63.39, 61.39, 52.20, 33.74, 19.49, 14.34. **HRMS (ESI)** calculated [M+H]<sup>+</sup> for C<sub>20</sub>H<sub>24</sub>NO<sub>4</sub>: 342.1700, found: 342.1705. **FTIR (cm<sup>-1</sup>)** 2924, 2105, 1722, 1641, 1502, 1439, 1368, 1278, 1219, 1187, 1026.

#### Methyl 3-(2-methoxy-1-(methyl(phenyl)amino)-2-oxoethyl)-4-methylbenzoate (**3u**)

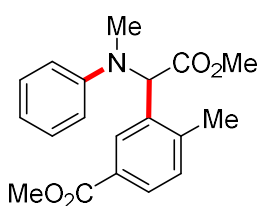

Following the general procedure, treatment of methyl 4-(((2-methoxy-2-oxoethyl)(methyl)amino)methyl)benzoate **1u** (0.126 g, 0.5 mmol) and 2-(trimethylsilyl)phenyl trifluoromethanesulfonate **2a** (0.223 g, 182 μL, 0.75 mmol) in the presence of KF (0.087 g, 1.5 mmol) and 18-crown-6 (0.396 g, 1.5 mmol) in THF (2.0 mL) at -10°C for 5 h, then warming to rt for 12 h followed by flash column chromatography (Pet. ether/EtOAc = 97/03) of the crude reaction mixture using silica gel afforded methyl 3-(2-methoxy-1-(methyl(phenyl)amino)-2-oxoethyl)-4-methylbenzoate **3u** as a yellow sticky liquid (0.072 g, 44% yield).

**R<sub>f</sub>** (Pet. ether/EtOAc = 95/05): 0.57; **<sup>1</sup>H NMR (400 MHz, CDCl<sub>3</sub>)** δ 7.93 (d, *J* = 7.9 Hz, 1H), 7.80 (s, 1H), 7.28-7.22 (m, 3H), 6.83-6.76 (m, 3H), 5.65 (s, 1H), 3.88 (s, 3H), 3.79 (s, 3H), 2.71 (s, 3H), 2.23 (s, 3H). **<sup>13</sup>C NMR (100 MHz, CDCl<sub>3</sub>)** δ 172.67, 166.77, 149.46, 143.94, 134.87, 131.19, 129.73, 129.49, 129.32, 128.30, 118.09, 112.88, 63.36, 52.29, 52.20, 33.70, 19.48. **HRMS (ESI)** calculated [M+H]<sup>+</sup> for C<sub>19</sub>H<sub>22</sub>NO<sub>4</sub>: 328.1543, found: 328.1549. **FTIR (cm<sup>-1</sup>)** 2951, 1721, 1600, 1500, 1437, 1235, 1196, 1033, 1006, 953.

#### Methyl 3-(2-isopropoxy-1-(methyl(phenyl)amino)-2-oxoethyl)-4-methylbenzoate (**3v**)

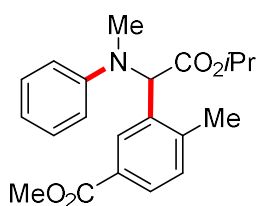

Following the general procedure, treatment of methyl 4-(((2-isopropoxy-2-oxoethyl)(methyl)amino)methyl)benzoate **1v** (0.140 g, 0.5 mmol) and 2-

(trimethylsilyl)phenyl trifluoromethanesulfonate **2a** (0.223 g, 182 $\mu$ L, 0.75mmol) in the presence of KF (0.087 g, 1.5 mmol) and 18-crown-6 (0.396 g, 1.5 mmol) in THF (2.0 mL) at -10°C for 5 h, then warming to rt for 12 h followed by flash column chromatography (Pet. ether/EtOAc = 97/03) of the crude reaction mixture using silica gel afforded methyl methyl 3-(2-isopropoxy-1-(methyl(phenyl)amino)-2-oxoethyl)-4-methylbenzoate **3v** as a yellow sticky liquid (0.142 g, 65% Sommelet-Hauser product and 15% [1,2]Stevens product).

**R<sub>f</sub>** (Pet. ether/EtOAc = 95/05): 0.53; **<sup>1</sup>H NMR (400 MHz, CDCl<sub>3</sub>)**  $\delta$  7.95 (dd,  $J$  = 7.9, 1.7 Hz, 1H), 7.91 (s, 1H), 7.29 (m, 3H), 6.85 (d,  $J$  = 8.2 Hz, 2H), 6.80 (t,  $J$  = 7.3 Hz, 1H), 5.60 (s, 1H), 5.22 (m, 1H), 3.90 (s, 3H), 2.74 (s, 3H), 2.26 (s, 3H), 1.33 (d,  $J$  = 6.3 Hz, 3H), 1.24 (d,  $J$  = 6.3 Hz, 3H). **<sup>13</sup>C NMR (100 MHz, CDCl<sub>3</sub>)**  $\delta$  171.70, 166.81, 149.59, 144.07, 135.08, 131.14, 129.59, 129.51, 129.43, 128.18, 117.91, 112.85, 69.11, 63.50, 52.17, 33.79, 22.03, 21.71, 19.47. **HRMS (ESI)** calculated [M+H]<sup>+</sup> for C<sub>21</sub>H<sub>26</sub>NO<sub>4</sub>: 356.1856, found: 356.1859. **FTIR (cm<sup>-1</sup>)** 2982, 2946, 1724, 1599, 1503, 1277, 1192, 1103, 962, 833.

#### Methyl 4-(3-(*tert*-butoxy)-2-(methyl(phenyl)amino)-3-oxopropyl)benzoate (**4a**)

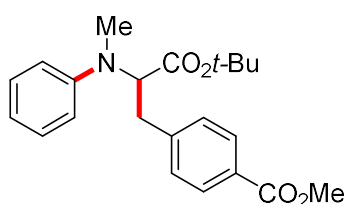

Following the procedure, treatment of methyl 4-(((2-(*tert*-butoxy)-2-oxoethyl)(methyl)amino)methyl)benzoate **1a** (0.147 g, 0.5 mmol) and 2-(trimethylsilyl)phenyl trifluoromethanesulfonate **2a** (0.223 g, 182 $\mu$ L, 0.75mmol) in the presence of KF (0.087 g, 1.5 mmol) and 18-crown-6 (0.396 g, 1.5 mmol) in THF (2.0 mL) at 70°C for 12h, followed by flash column chromatography (Pet. ether/EtOAc = 97/03) of the crude reaction mixture using silica gel afforded methyl 4-(3-(*tert*-butoxy)-2-(methyl(phenyl)amino)-3-oxopropyl)benzoate **4a** as a colourless sticky liquid (0.129 g, 70% yield).

**R<sub>f</sub>** (Pet. ether/EtOAc = 95/05): 0.51; **<sup>1</sup>H NMR (400 MHz, CDCl<sub>3</sub>)**  $\delta$  7.93 (d,  $J$  = 8.2 Hz, 2H), 7.29 (d,  $J$  = 8.2 Hz, 2H), 7.19 (t,  $J$  = 8.4 Hz, 2H), 6.76-6.72 (m, 3H), 4.49 (dd,  $J$  = 8.2, 7.0 Hz, 1H), 3.89 (s, 3H), 3.33 (dd,  $J$  = 14.1, 6.8 Hz, 1H), 3.12 (dd,  $J$  = 14.1, 8.4 Hz, 1H), 2.90 (s, 3H), 1.36 (s, 9H). **<sup>13</sup>C NMR (100 MHz, CDCl<sub>3</sub>)**  $\delta$  170.97, 167.16, 150.02, 143.90, 129.82, 129.28, 129.12, 128.53, 118.00, 114.04, 81.78, 64.63, 52.14, 35.76, 33.79, 28.12. **HRMS (ESI)** calculated [M+H]<sup>+</sup> for C<sub>22</sub>H<sub>28</sub>NO<sub>4</sub>: 370.2013, found: 370.2018. **FTIR (cm<sup>-1</sup>)** 2926, 2360, 1722, 1643, 1503, 1279, 1219, 1153, 1108, 1025, 845.

### Methyl (*S*)-2-benzyl-1-phenylpyrrolidine-2-carboxylate (**4w**)

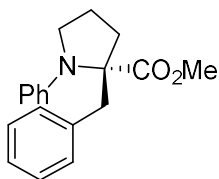

The treatment of methyl benzyl-*L*-prolinate **1w** (0.055 g, 0.25 mmol) and 2-(trimethylsilyl)phenyl trifluoromethanesulfonate **2a** (0.112 g, 91  $\mu$ L, 0.375 mmol) in the presence of CsF (0.114 g, 0.75 mmol) in DME (1.0 mL) at -20°C for 6h, followed by flash column chromatography (Pet. ether/EtOAc = 97/03) of the crude reaction mixture using silica gel afforded methyl (*S*)-2-benzyl-1-phenylpyrrolidine-2-carboxylate **4w** as a yellow sticky liquid (0.036 g, 49% yield).

**R<sub>f</sub>** (Pet. ether/EtOAc = 95/05): 0.51; 87% ee,  $[\alpha]_D^{25} = +39.21$  (c 0.1, CHCl<sub>3</sub>). **HPLC** (Chiralcel OD-H, 99 : 1 (hexane:IPA), 0.8 mL/min) Major: 11.9 min, Minor: 9.9 min. **<sup>1</sup>H NMR (400 MHz, CDCl<sub>3</sub>)**  $\delta$  7.32- 7.28 (m, 2H), 7.24-7.21 (m, 3H), 7.04-7.02 (m, 2H), 6.78 (t, *J* = 7.3 Hz, 1H), 6.63 (d, *J* = 8.4 Hz, 2H), 3.82 (d, *J* = 14.1 Hz, 1H), 3.72 (s, 3H), 3.38 (q, *J* = 7.4 Hz, 1H), 3.25-3.19 (m, 2H), 2.29-2.16 (m, 2H), 1.82 – 1.76 (m, 1H), 1.14-1.04 (m, 1H). **<sup>13</sup>C NMR (100 MHz, CDCl<sub>3</sub>)**  $\delta$  177.48, 145.85, 137.26, 130.98, 129.37, 128.03, 126.55, 116.45, 112.96, 69.26, 52.56, 50.69, 37.71, 37.65, 22.54. **HRMS (ESI)** calculated  $[M+H]^+$  for C<sub>19</sub>H<sub>22</sub>NO<sub>2</sub>: 296.1645, found: 296.1644. **FTIR (cm<sup>-1</sup>)** 2924, 1762, 1672, 1516, 1452, 1146, 1077, 1049, 906.

### Methyl 3-(cyanomethyl)-4-((cyclohexyl(phenyl)amino)methyl)benzoate (**5**)

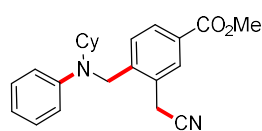

Following the general procedure, treatment of methyl 4-(((cyanomethyl)(cyclohexyl)amino)methyl)benzoate **1x** (0.143 g, 0.5 mmol) and 2-(trimethylsilyl)phenyl trifluoromethanesulfonate **2a** (0.223 g, 182  $\mu$ L, 0.75 mmol) in the presence of KF (0.087 g, 1.5 mmol) and 18-crown-6 (0.396 g, 1.5 mmol) in THF (2.0 mL) at -10°C for 5 h, then warming to rt for 12 h followed by flash column chromatography (Pet. ether/EtOAc = 97/03) of the crude reaction mixture using silica gel afforded methyl 3-(cyanomethyl)-4-((cyclohexyl(phenyl) amino)methyl)benzoate **5** as a yellow sticky liquid (0.073 g, 40% yield).

**R<sub>f</sub>** (Pet. ether/EtOAc = 95/05): 0.44; **<sup>1</sup>H NMR (400 MHz, CDCl<sub>3</sub>)**  $\delta$  8.05 (s, 1H), 7.92 (d, *J* = 8.1 Hz, 1H), 7.46 (d, *J* = 8.1 Hz, 1H), 7.18 (t, *J* = 7.9 Hz, 2H), 6.74 (t, *J* = 7.3 Hz, 1H), 6.63 (d, *J* = 8.3 Hz, 2H), 4.45 (s, 2H), 3.91 (s, 3H), 3.84 (s, 2H), 3.77-3.72 (m, 1H), 1.92 (d, *J* = 10.4 Hz, 2H), 1.82 (d, *J* = 11.8 Hz, 2H), 1.68 (d, *J* = 13.2 Hz, 1H), 1.40-1.31 (m, 4H), 1.17-1.11 (m, 1H). **<sup>13</sup>C NMR (100 MHz, CDCl<sub>3</sub>)**  $\delta$  166.49, 148.71, 143.72, 130.53, 129.90, 129.55, 129.40, 128.47, 127.34, 117.83, 116.90, 114.15, 57.99, 52.38, 47.87, 30.46, 26.18, 25.88, 21.34. **HRMS (ESI)**

calculated  $[M+H]^+$  for  $C_{23}H_{27}N_2O_2$ : 363.2067, found: 363.2073. **FTIR ( $cm^{-1}$ )** 2925, 2348, 1722, 1635, 1499, 1440, 1368, 1279, 1223, 1152, 1113, 1039, 976, 939.

## 8. $^1\text{H}$ and $^{13}\text{C}$ NMR Spectra of $\alpha$ -Aryl Amino Acid Derivatives

### Methyl 3-(2-(*tert*-butoxy)-1-(methyl(phenyl)amino)-2-oxoethyl)-4-methylbenzoate (**3a**)

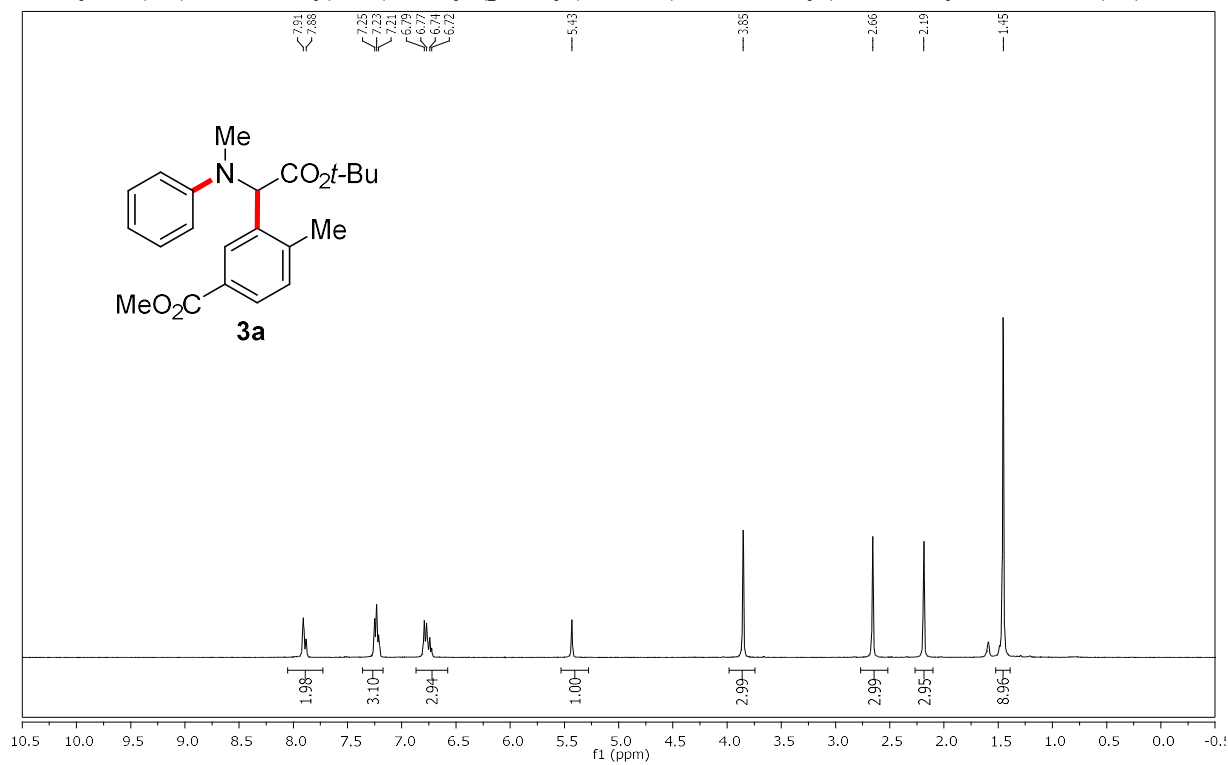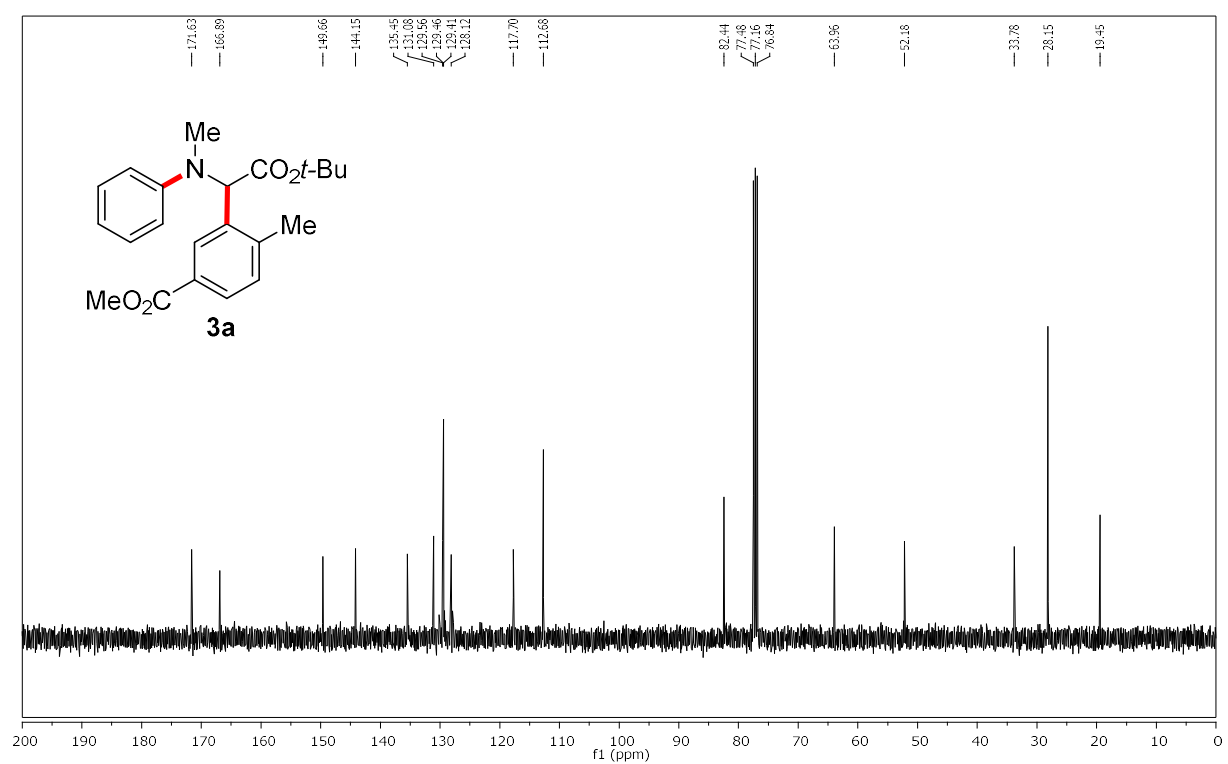



**Methyl 3-(2-(*tert*-butoxy)-1-((3,4-dimethylphenyl)(methyl)amino)-2-oxoethyl)-4-methylbenzoate(3b)**

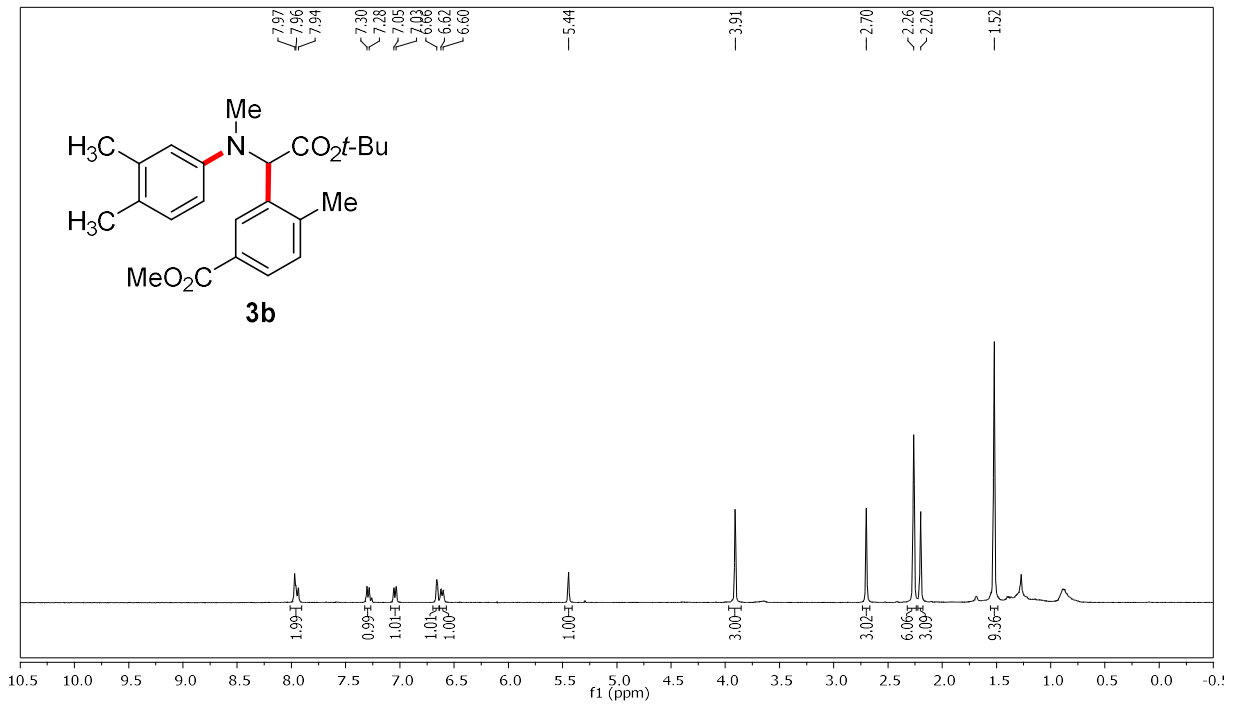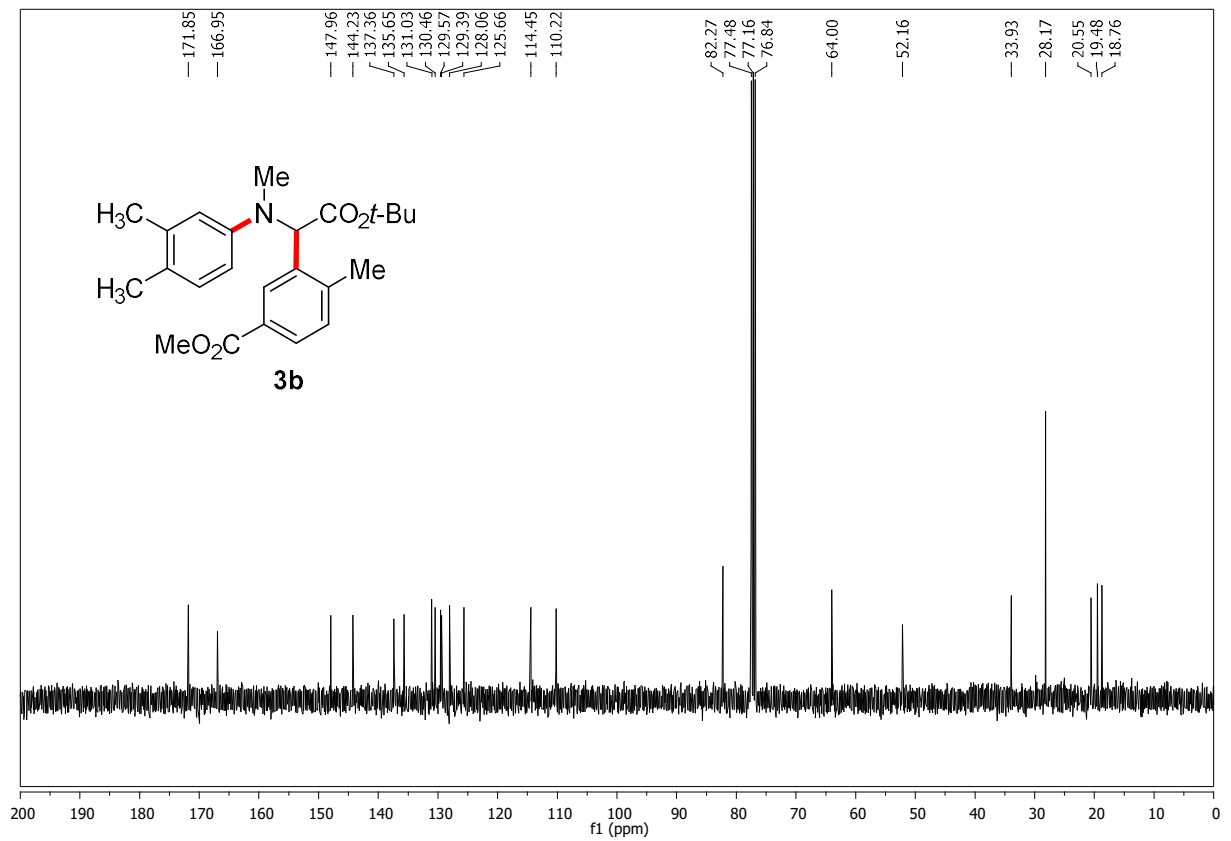

**Methyl 3-(2-(*tert*-butoxy)-1-((2,3-dihydro-1*H*-inden-5-yl)(methyl)amino)-2-oxoethyl)-4-methylbenzoate (3c)**

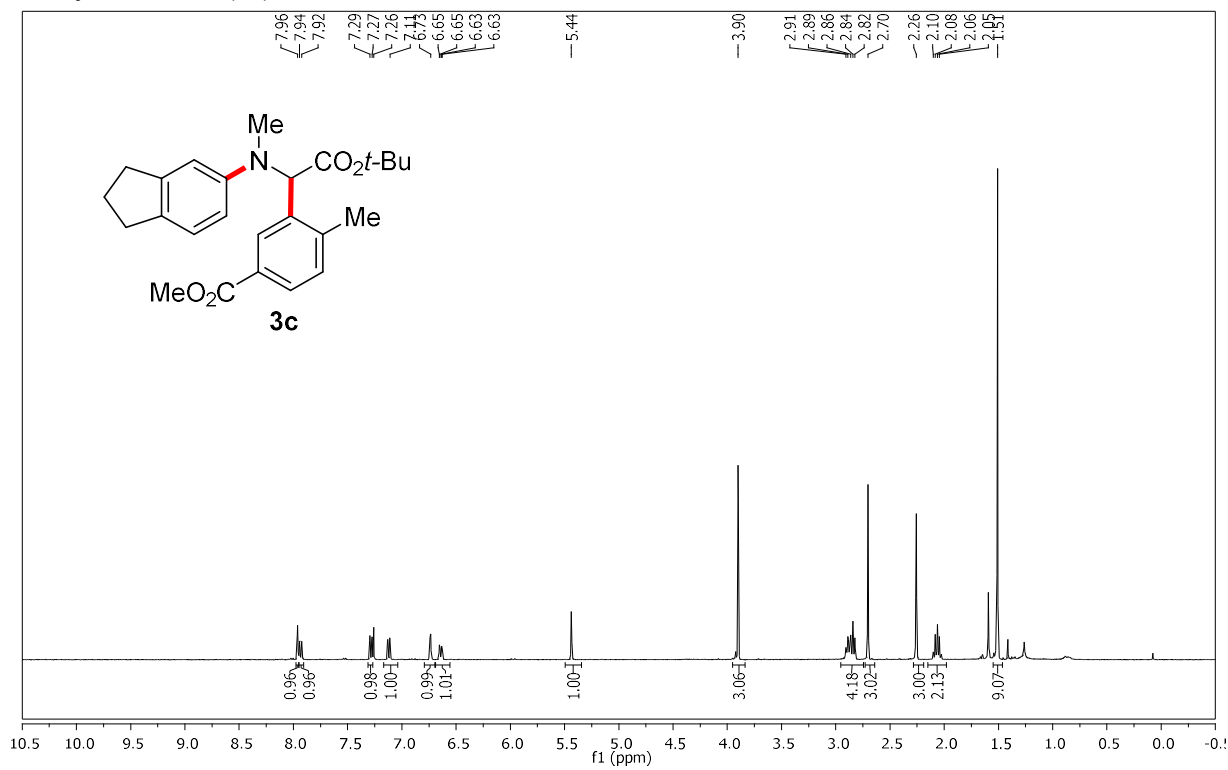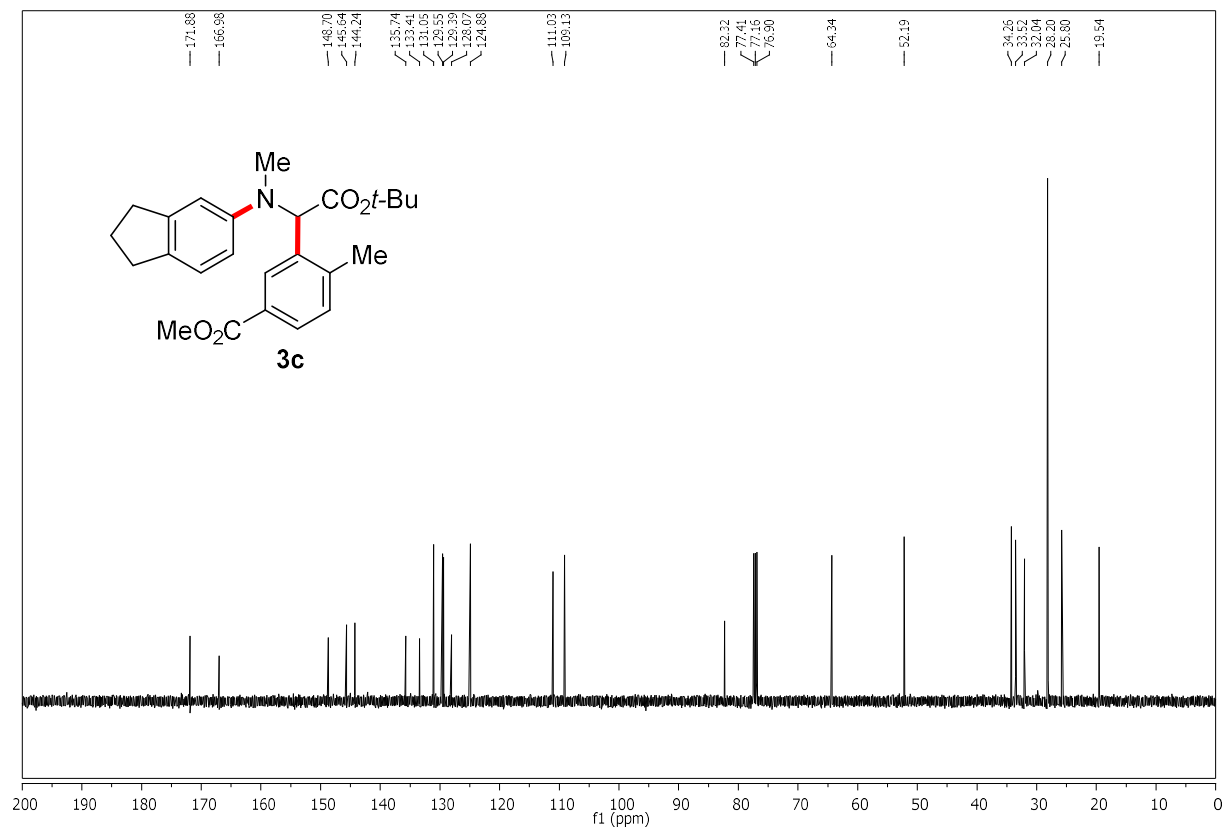

**Methyl 3-(1-(benzo[d][1,3]dioxol-5-yl(methyl)amino)-2-(*tert*-butoxy)-2-oxoethyl)-4-methylbenzoate (3d)**

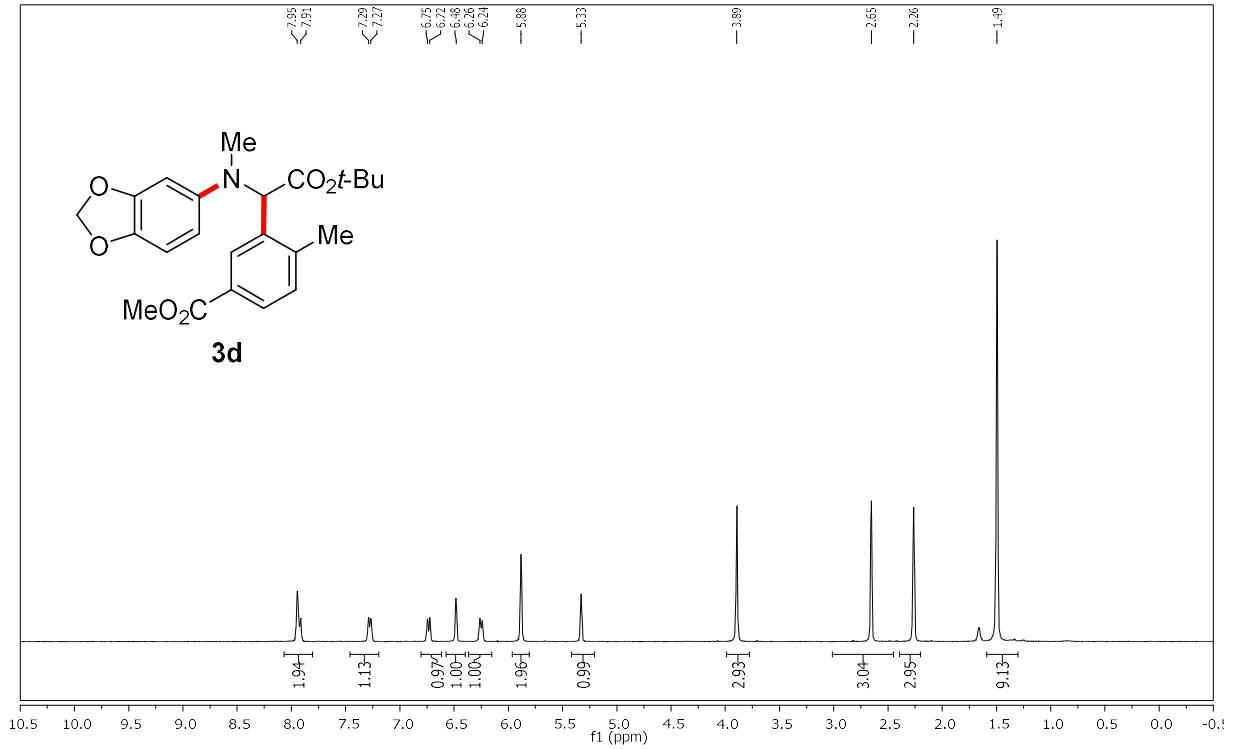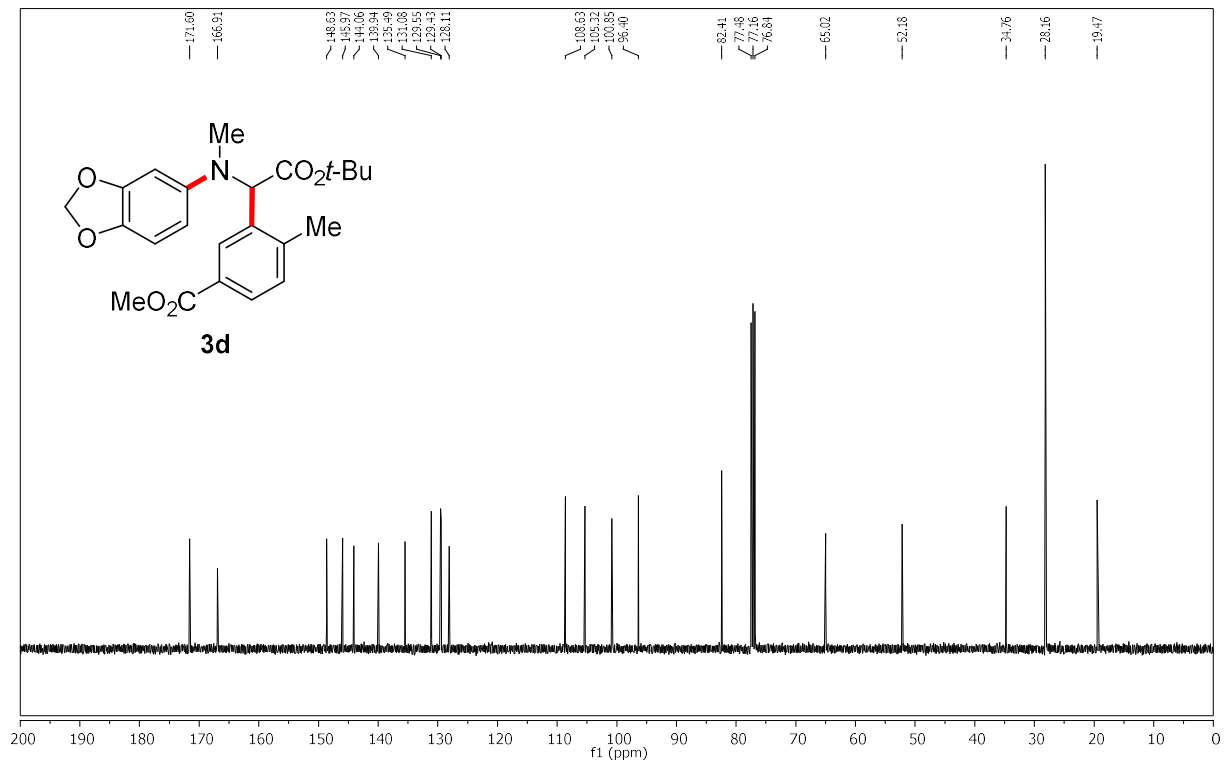

**Methyl 3-(2-(*tert*-butoxy)-1-((3,4-difluorophenyl)(methyl)amino)-2-oxoethyl)-4-methylbenzoate (3e)**

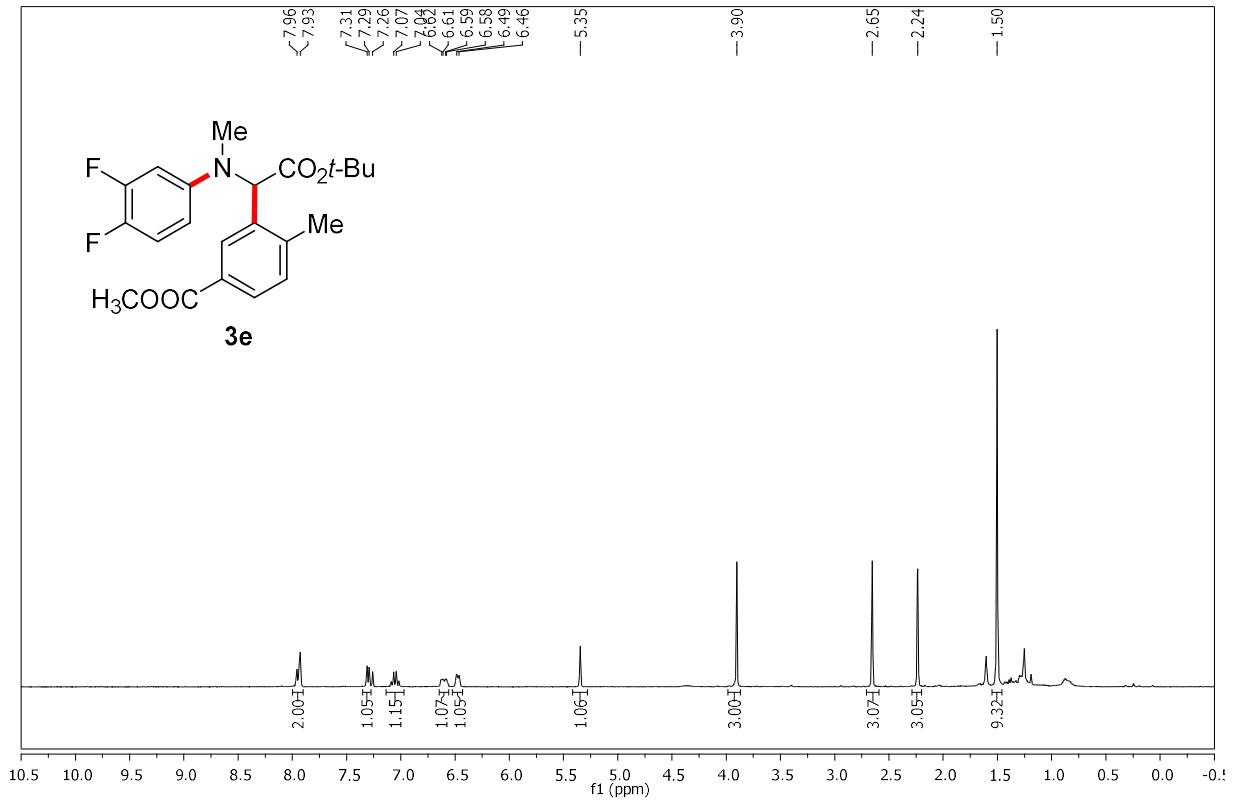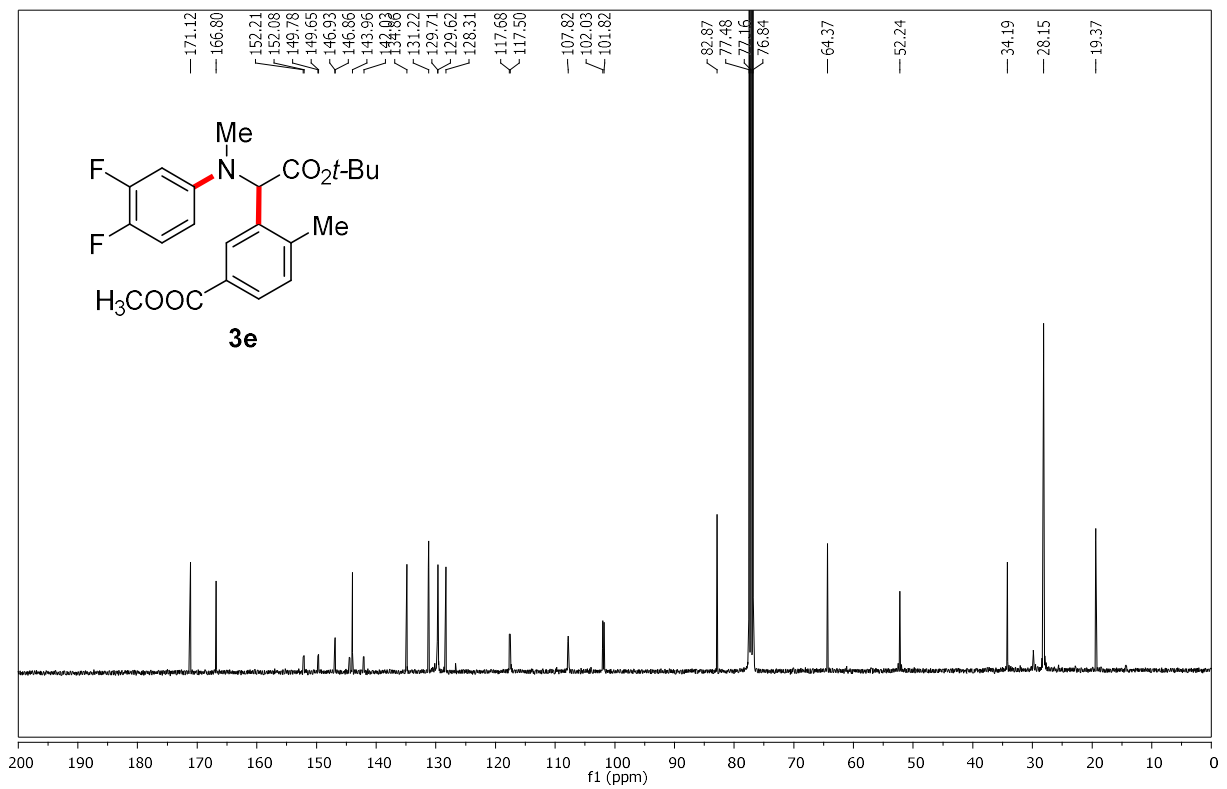

Methyl 3-(2-(*tert*-butoxy)-1-(methyl(naphthalen-2-yl)amino)-2-oxoethyl)-4-methylbenzoate (**3f**)

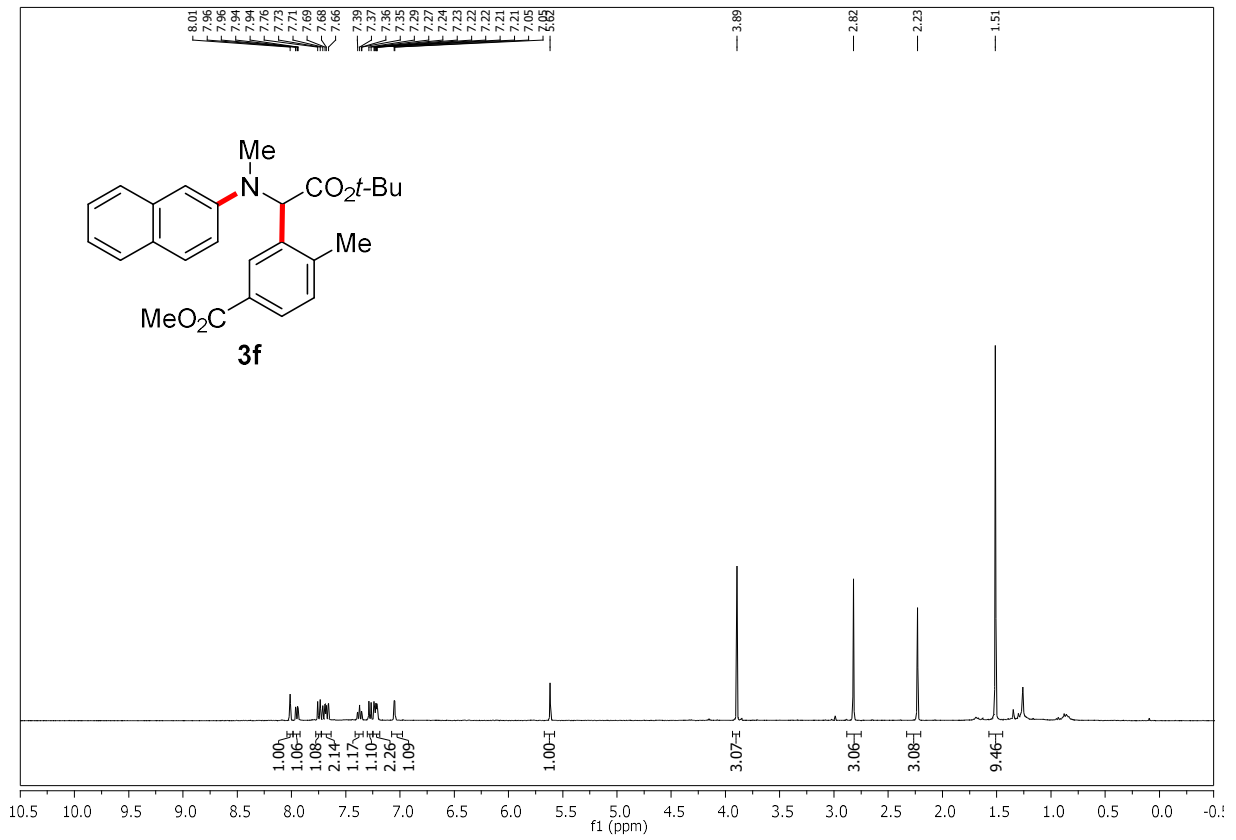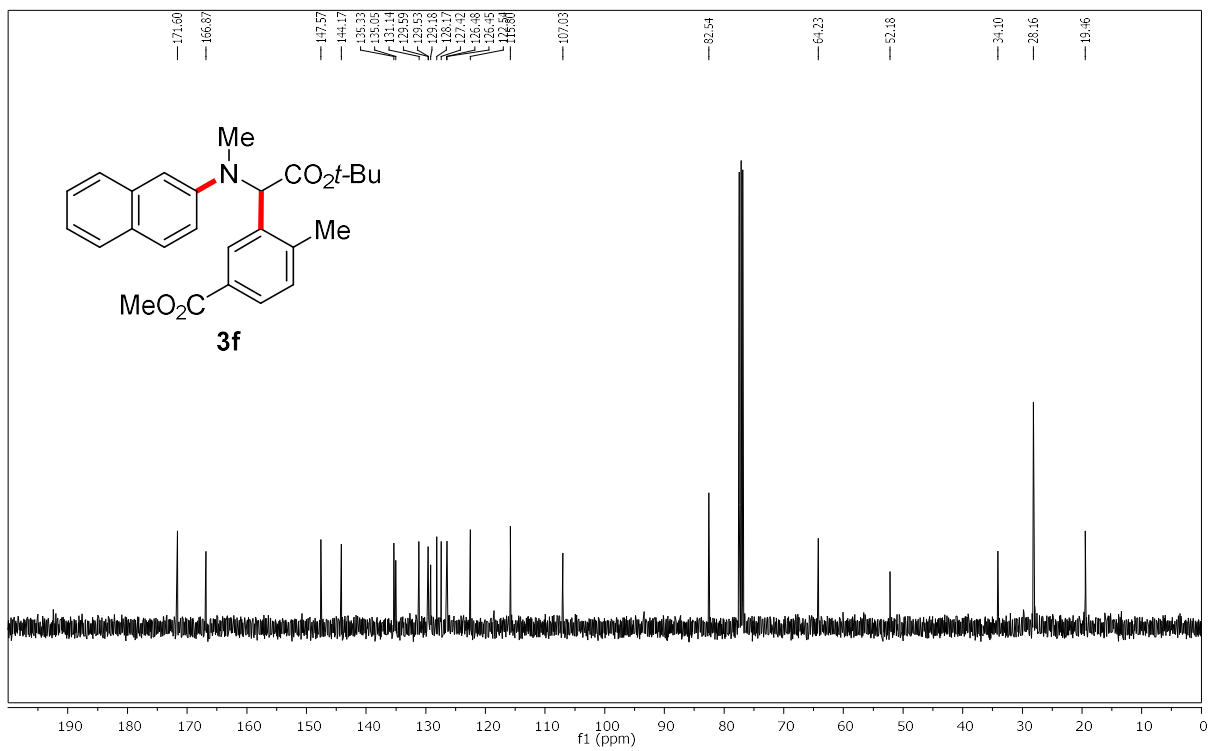

**Methyl 3-(2-(*tert*-butoxy)-1-((3-methoxyphenyl)(methyl)amino)-2-oxoethyl)-4-methylbenzoate (3g)**

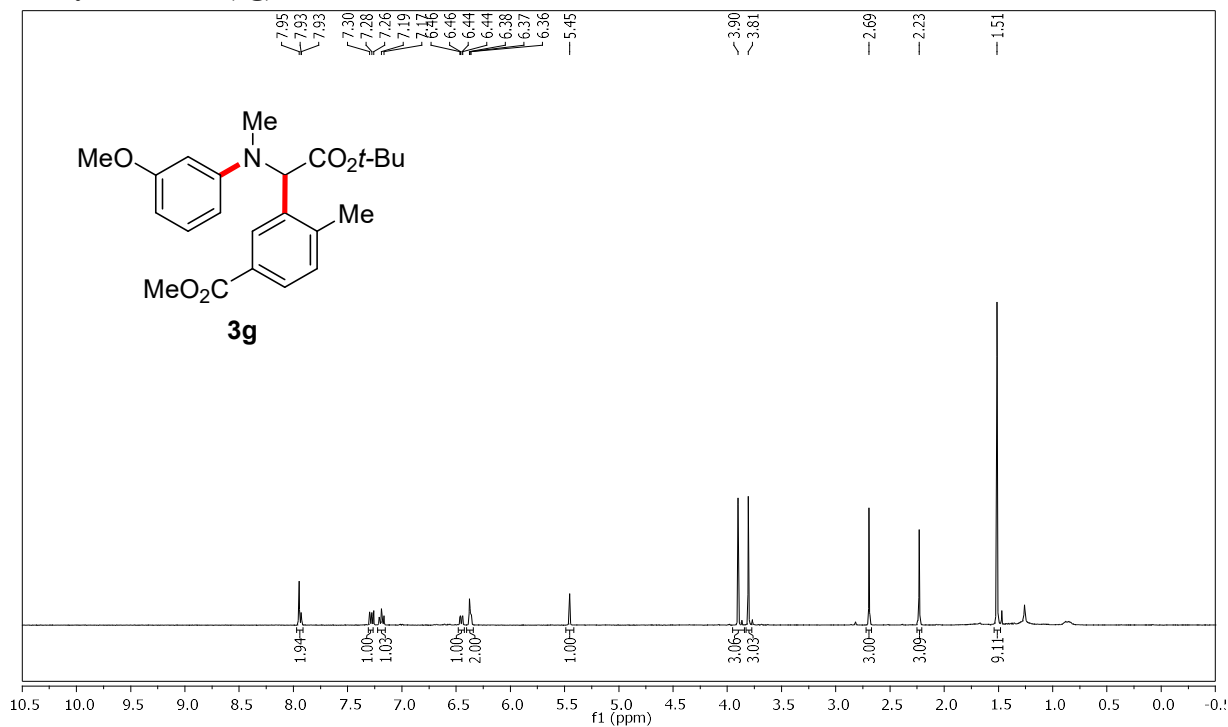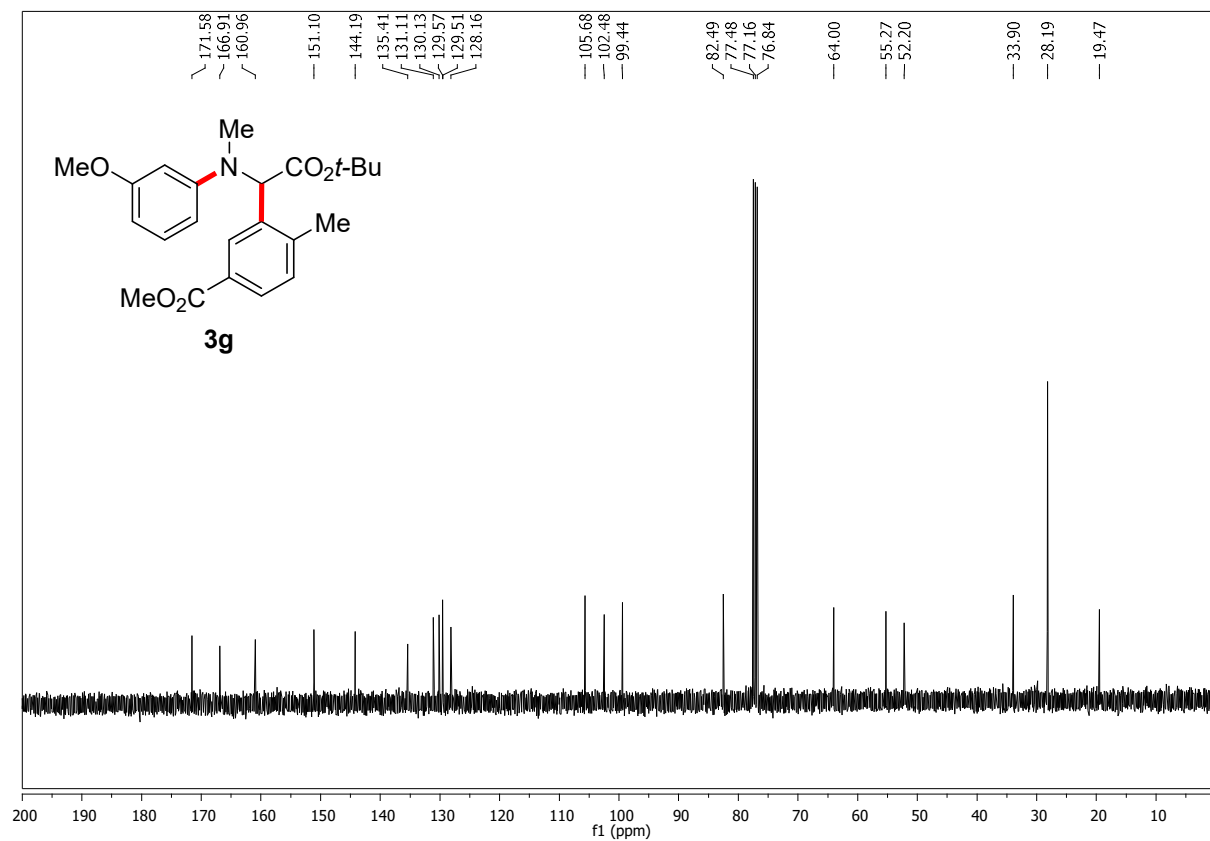

**Methyl 3-(2-(*tert*-butoxy)-1-(methyl(*p*-tolyl)amino)-2-oxoethyl)-4-methylbenzoate (3h) and Methyl 3-(2-(*tert*-butoxy)-1-(methyl(*m*-tolyl)amino)-2-oxoethyl)-4-methylbenzoate (3h')**

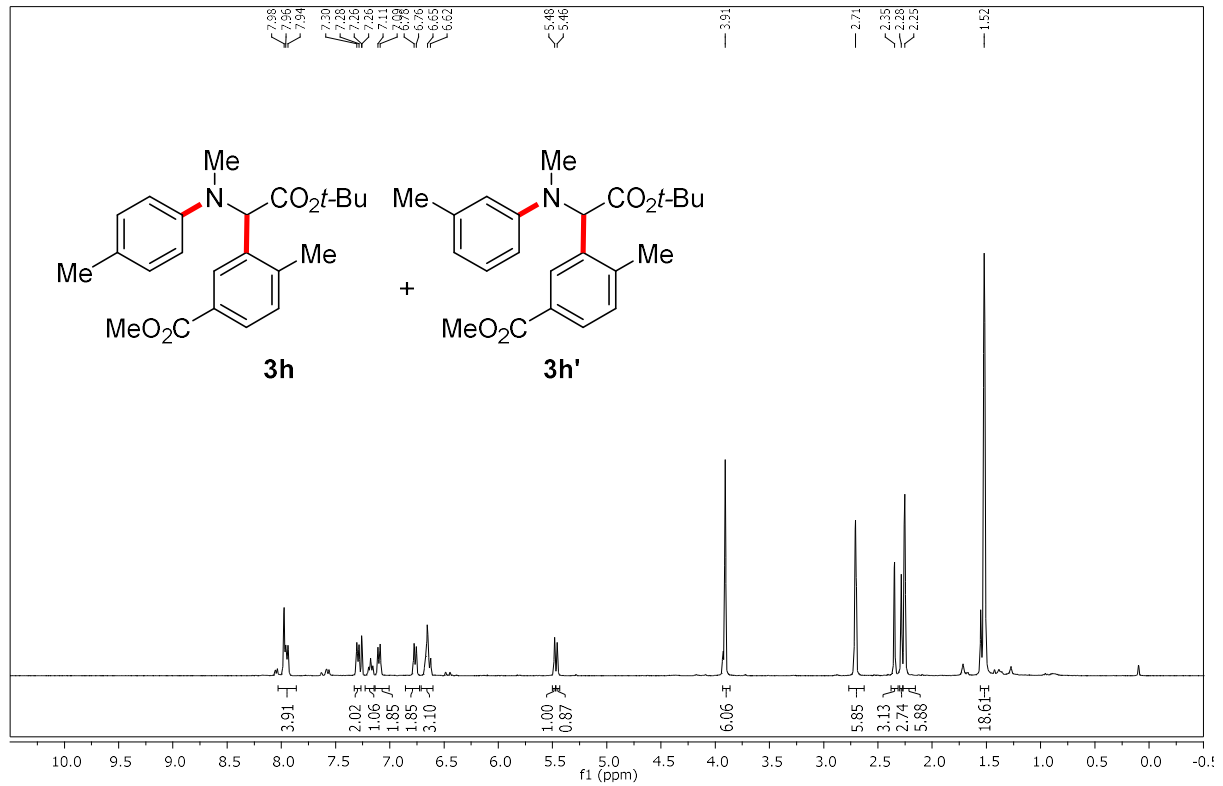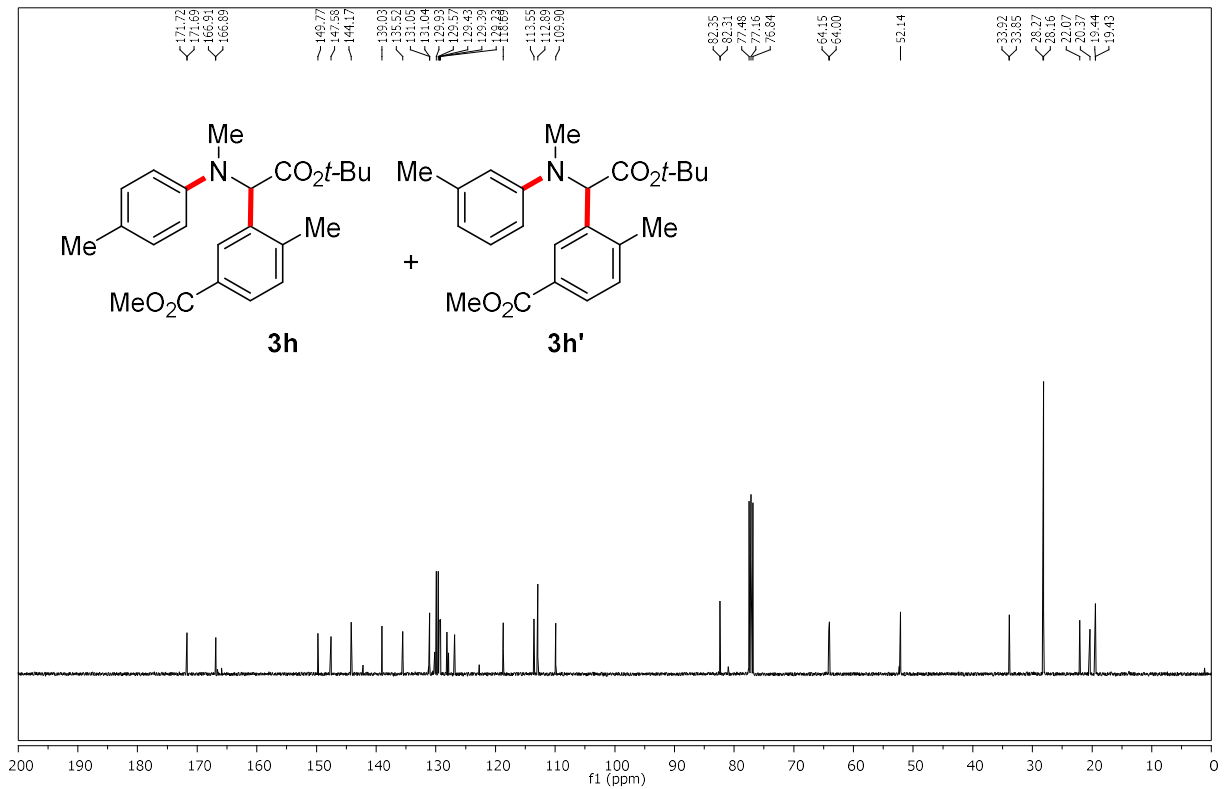

**Methyl 3-(2-(*tert*-butoxy)-1-((4-fluorophenyl)(methyl)amino)-2-oxoethyl)-4-methylbenzoate (3i) and Methyl 3-(2-(*tert*-butoxy)-1-((3-fluorophenyl)(methyl)amino)-2-oxoethyl)-4-methylbenzoate(3i')**

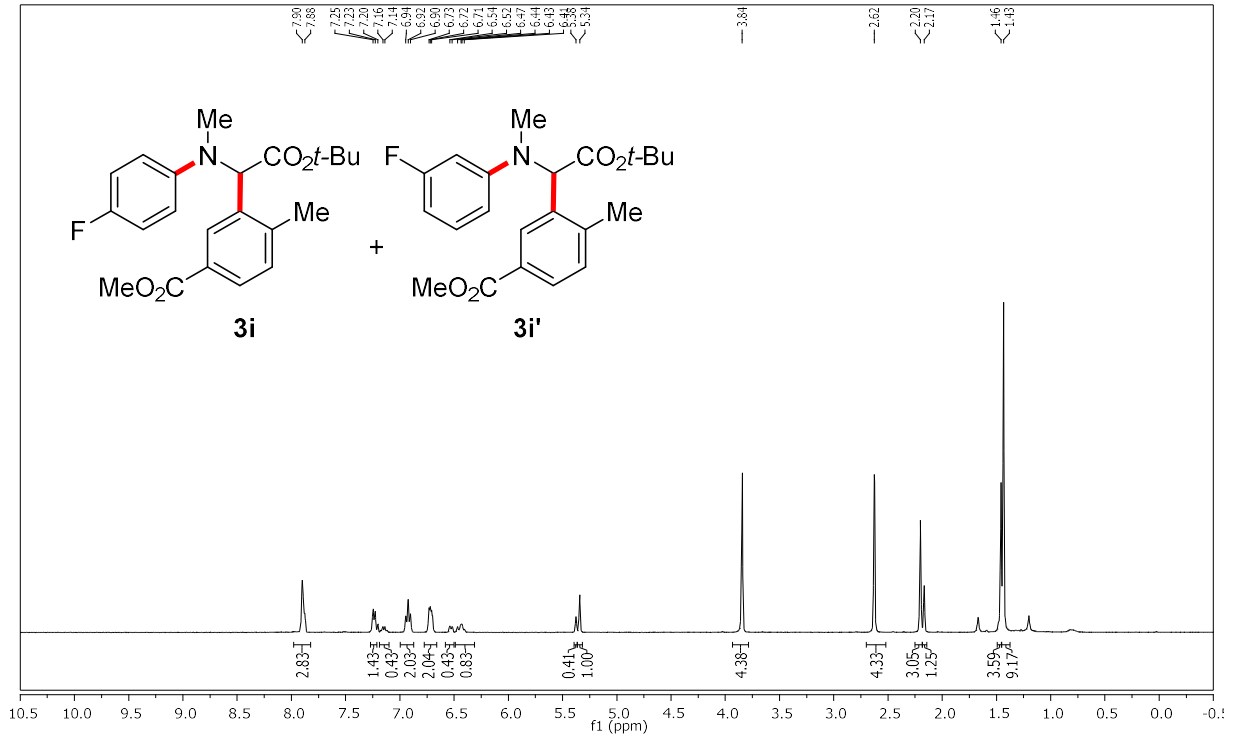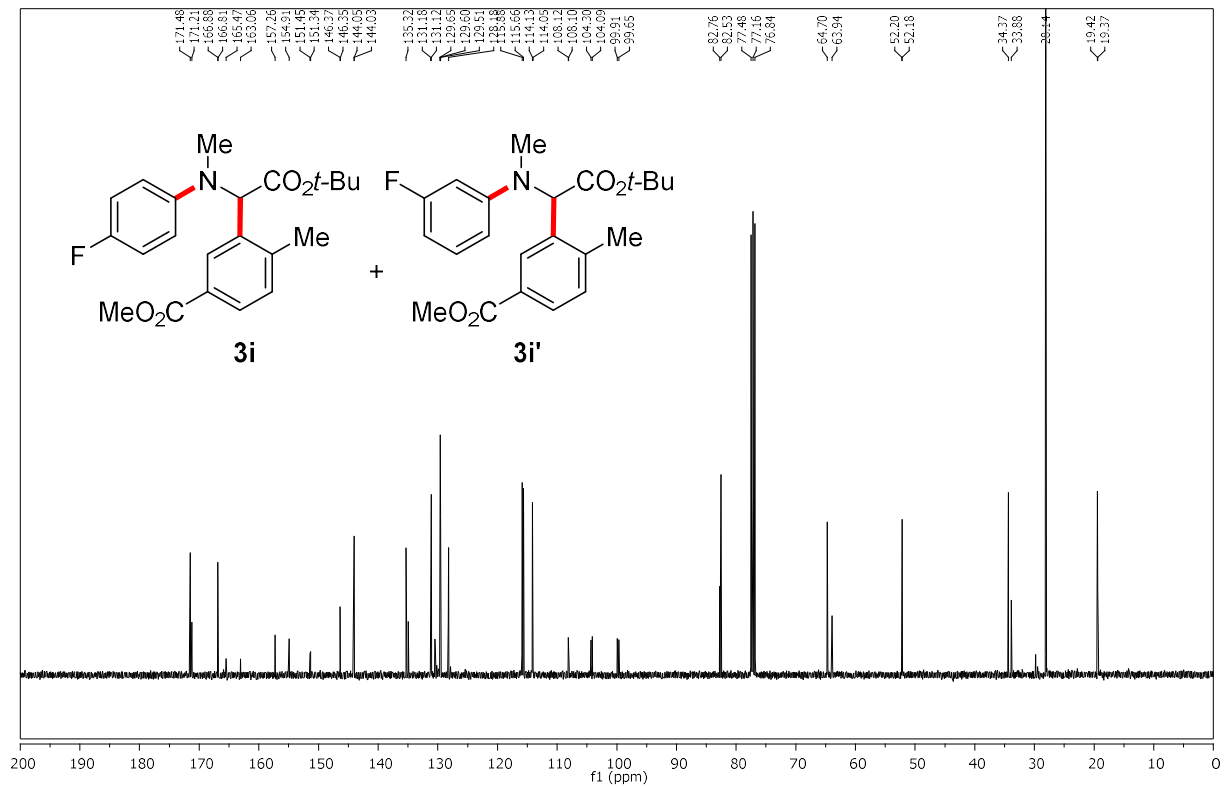



***tert*-Butyl 2-(5-cyano-2-methylphenyl)-2-(methyl(phenyl)amino)acetate (3j)**

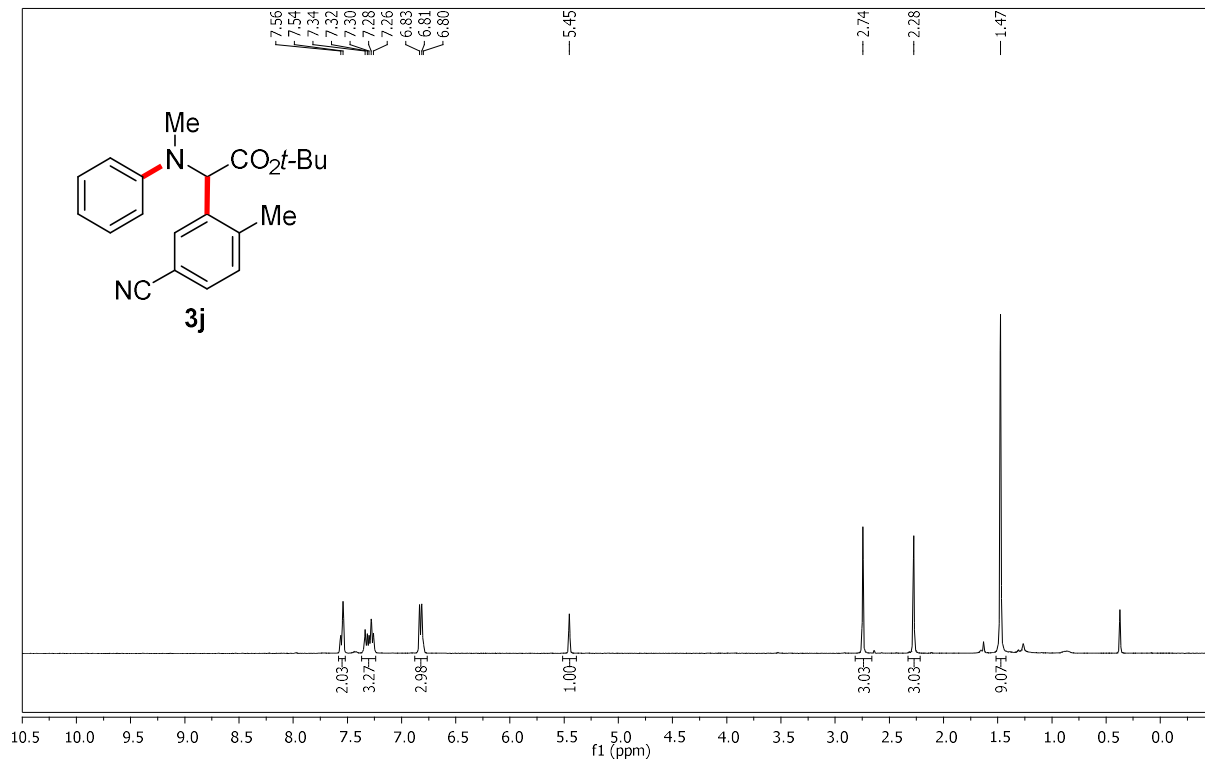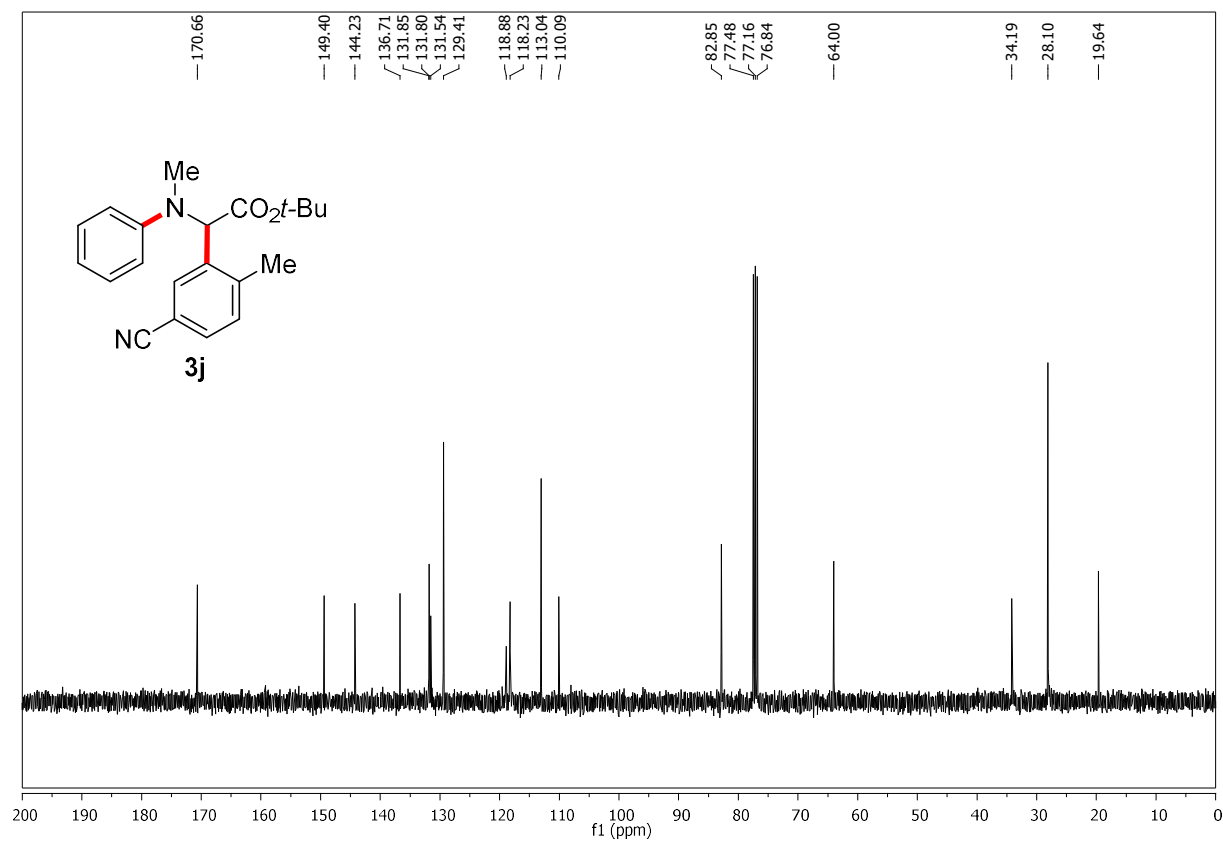

**tert-Butyl 2-(methyl(phenyl)amino)-2-(2-methyl-5-(trifluoromethyl)phenyl)acetate (3k)**

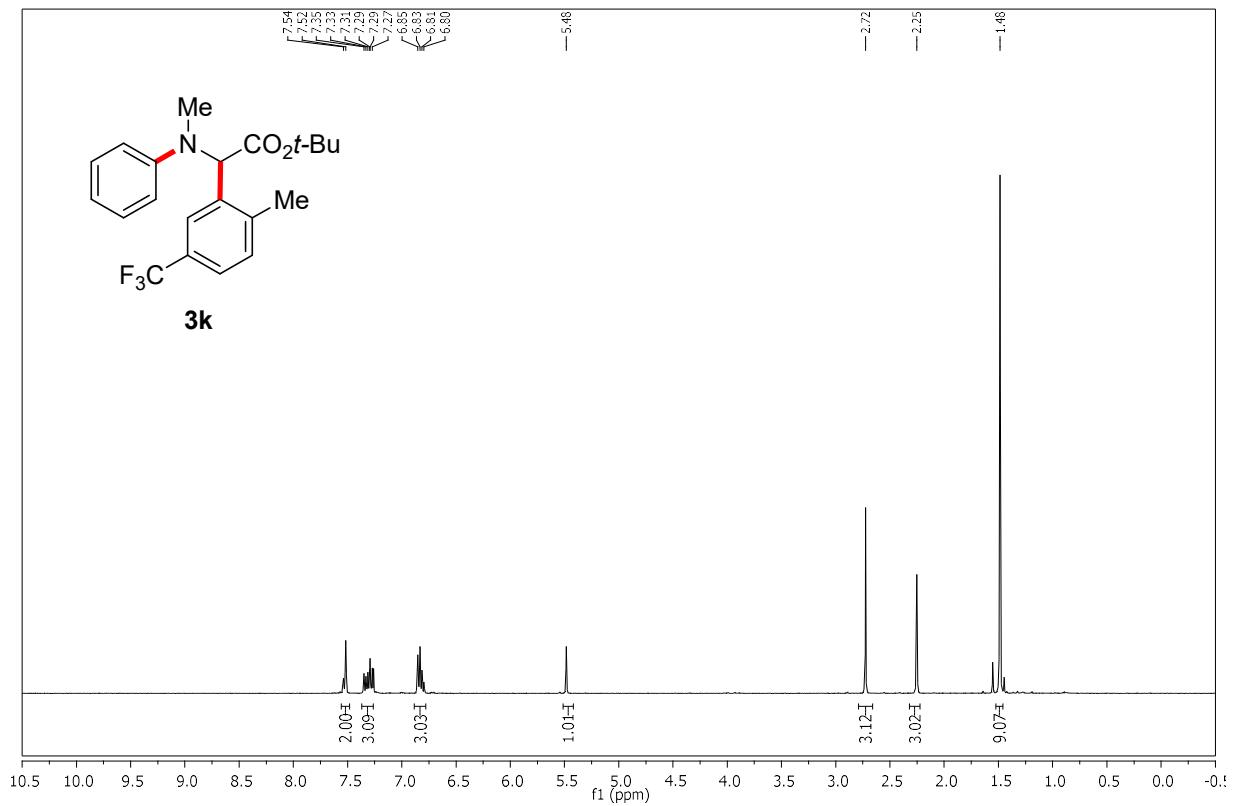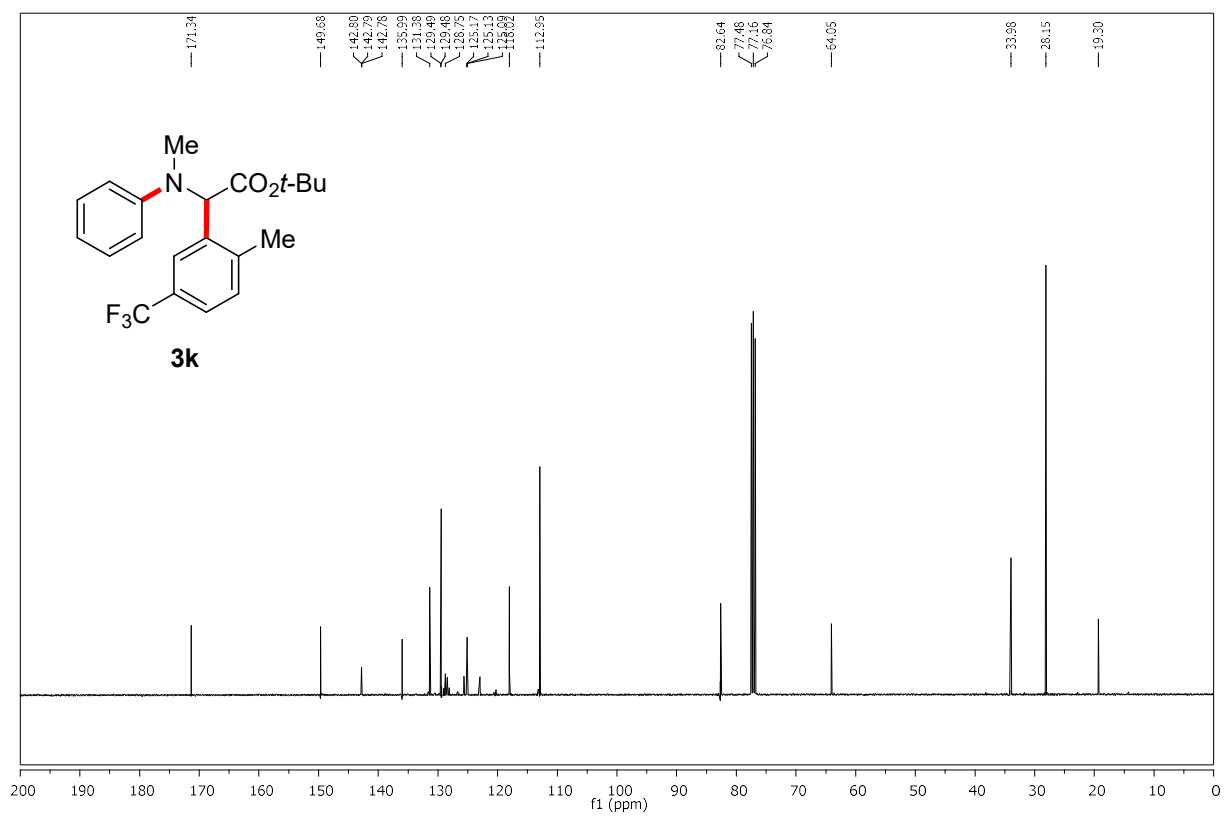

***tert*-Butyl 2-(methyl(phenyl)amino)-2-(2-methyl-5-nitrophenyl)acetate (3I)**

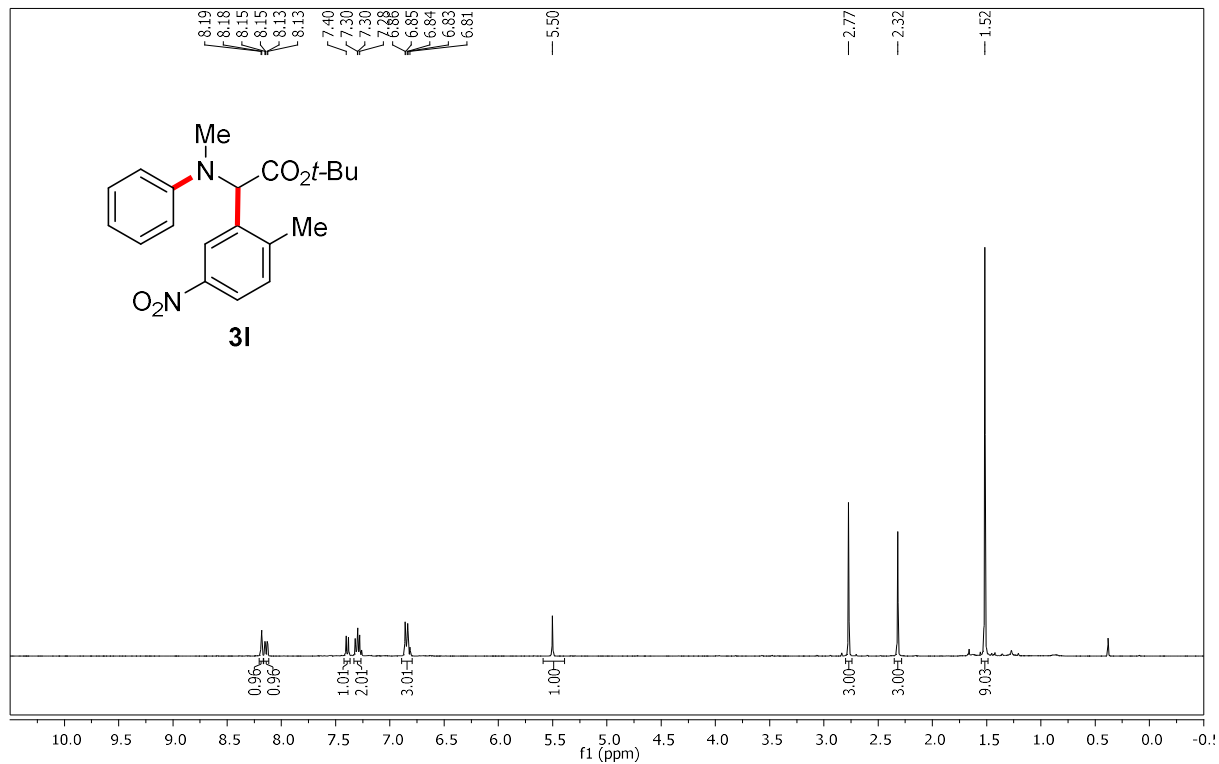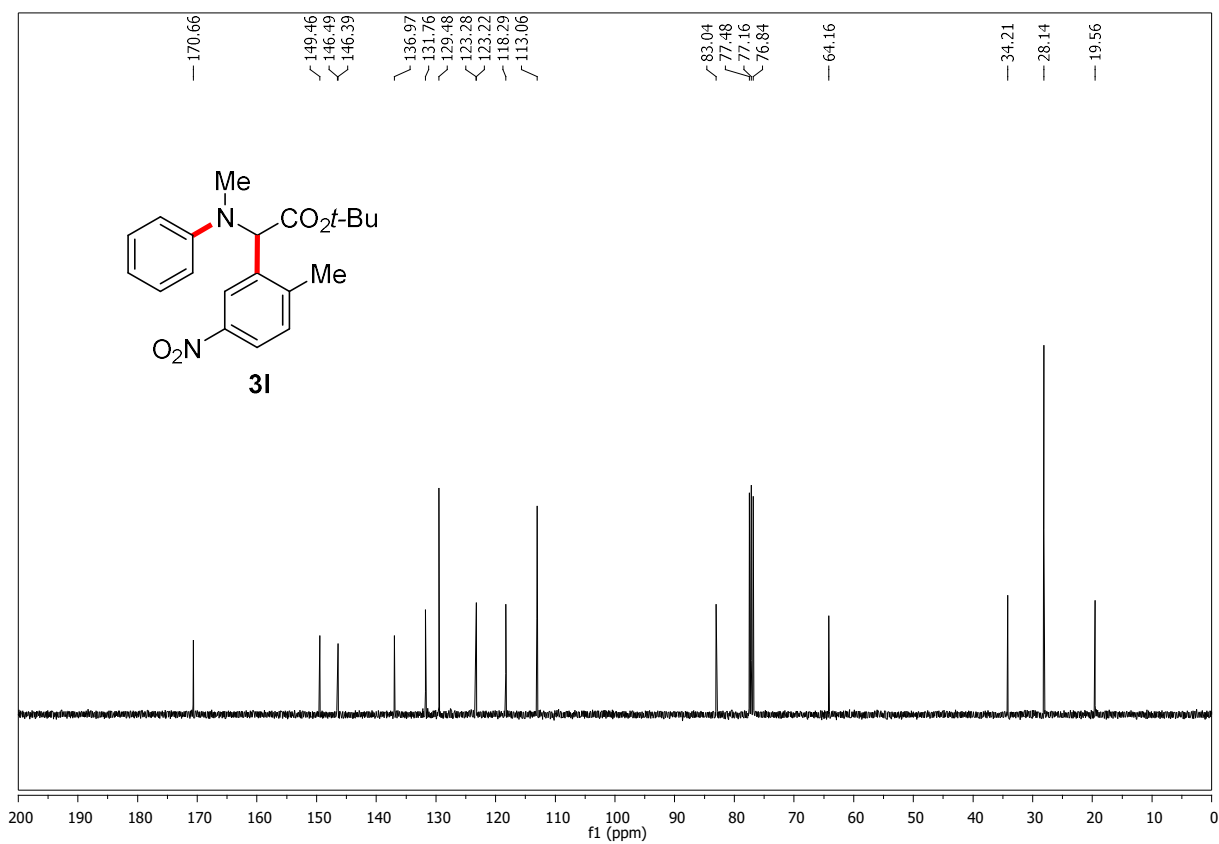

***tert*-Butyl 2-(methyl(phenyl)amino)-2-(2-methyl-4-(trifluoromethyl)phenyl)acetate (3m)**

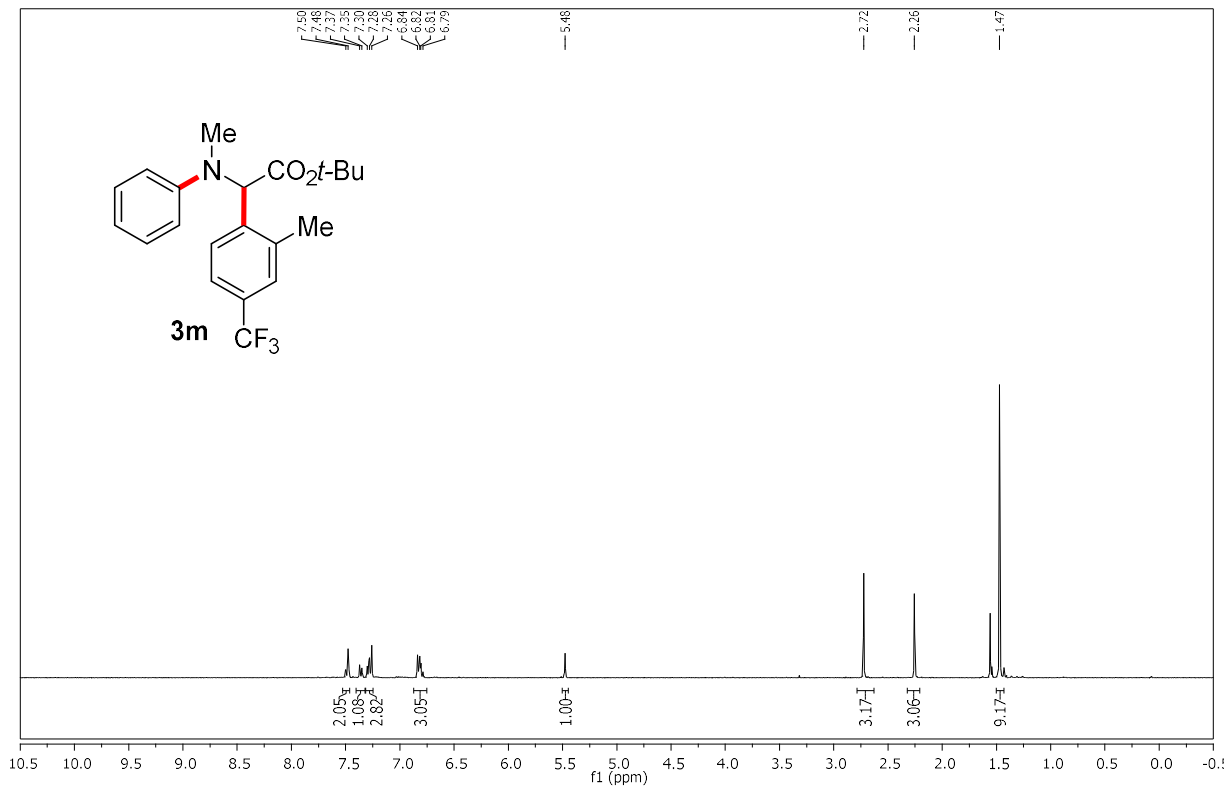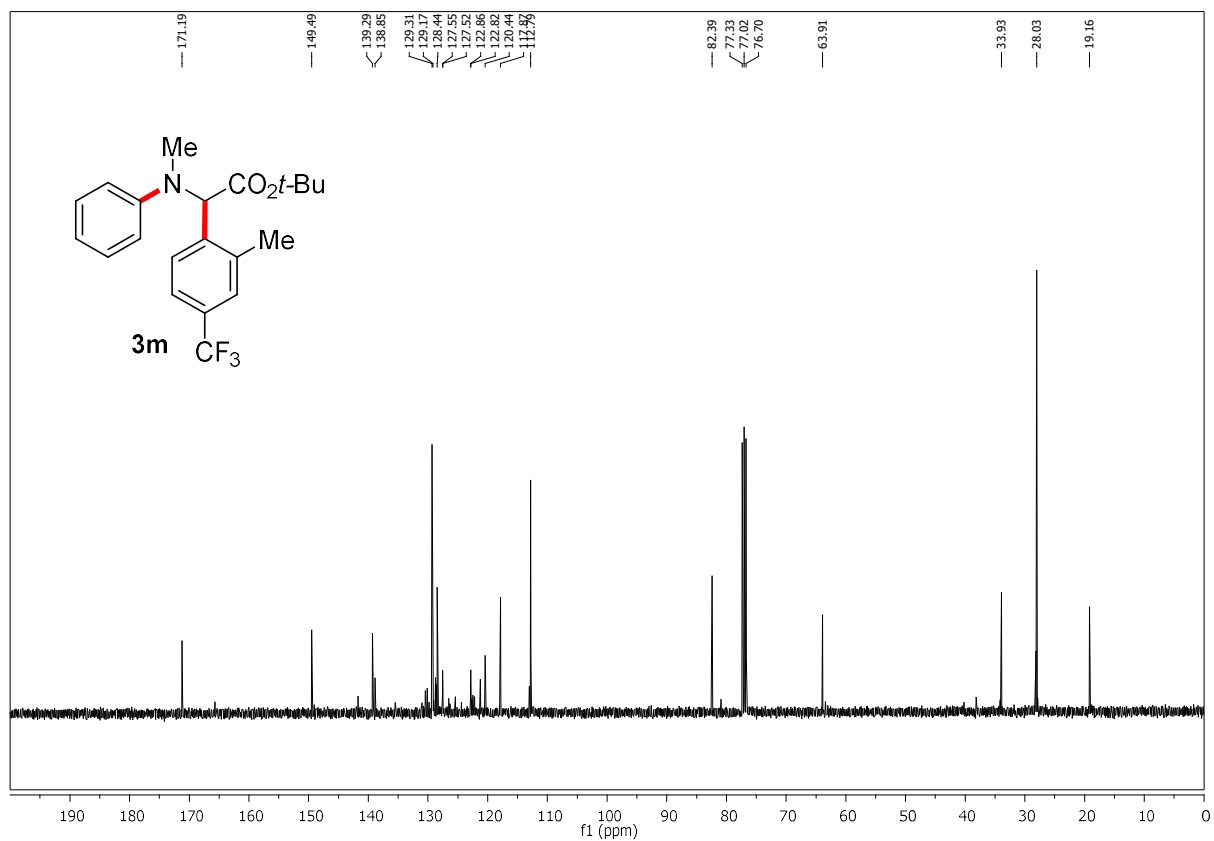

***tert*-Butyl 2-(methyl(phenyl)amino)-2-(2-methyl-3-nitrophenyl)acetate (3n)**

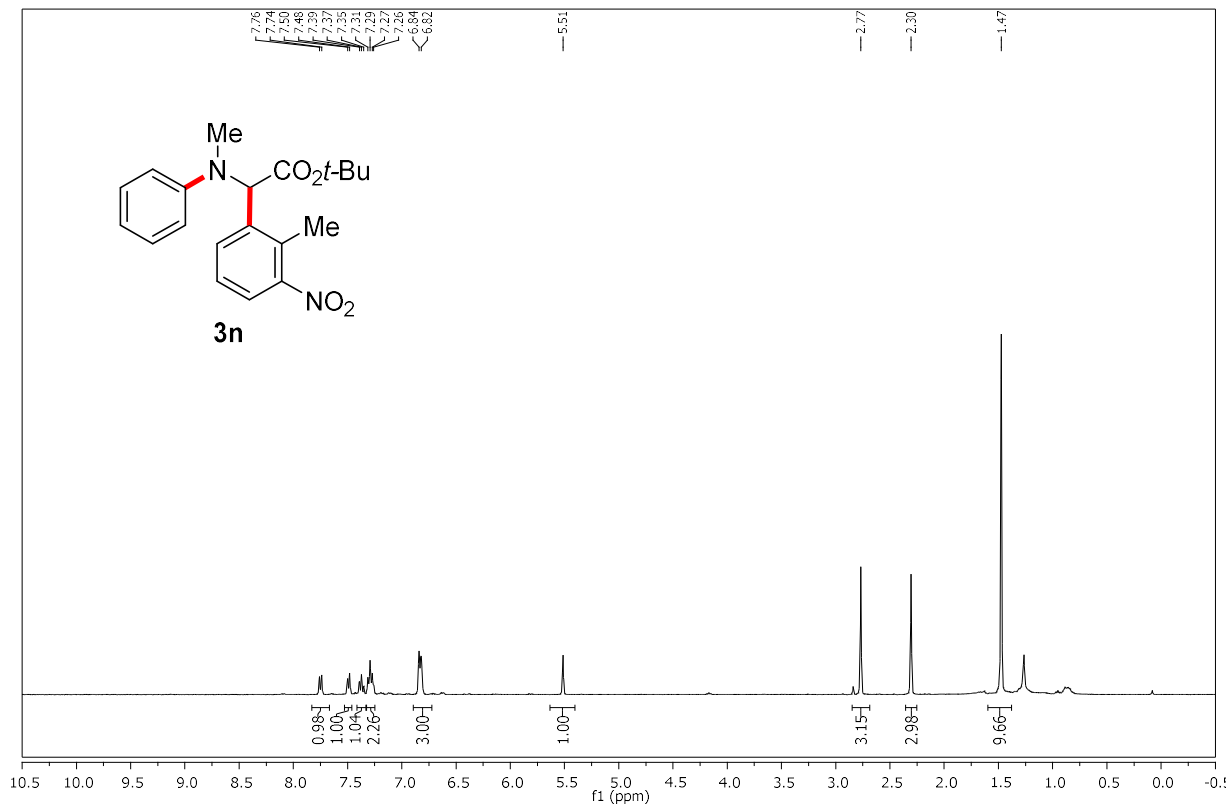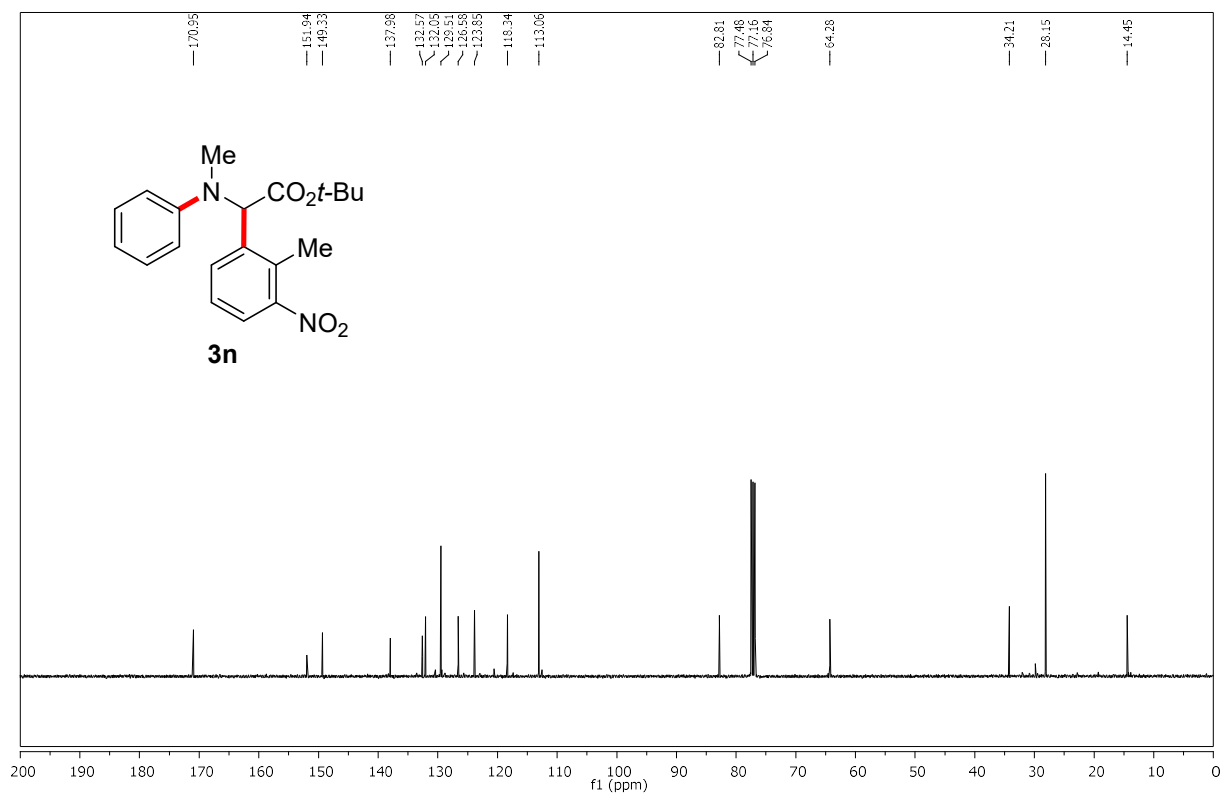

***tert*-Butyl 2-(methyl(phenyl)amino)-2-(2-methylpyridin-3-yl)acetate (3o)**

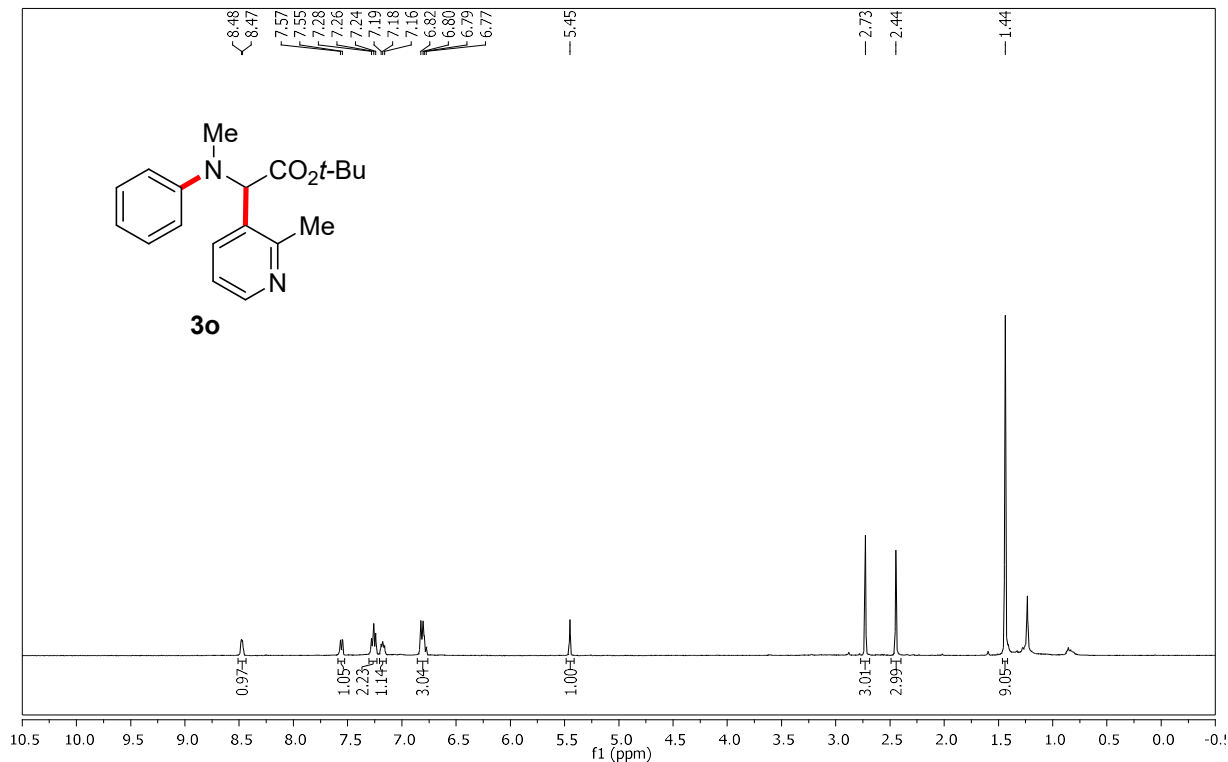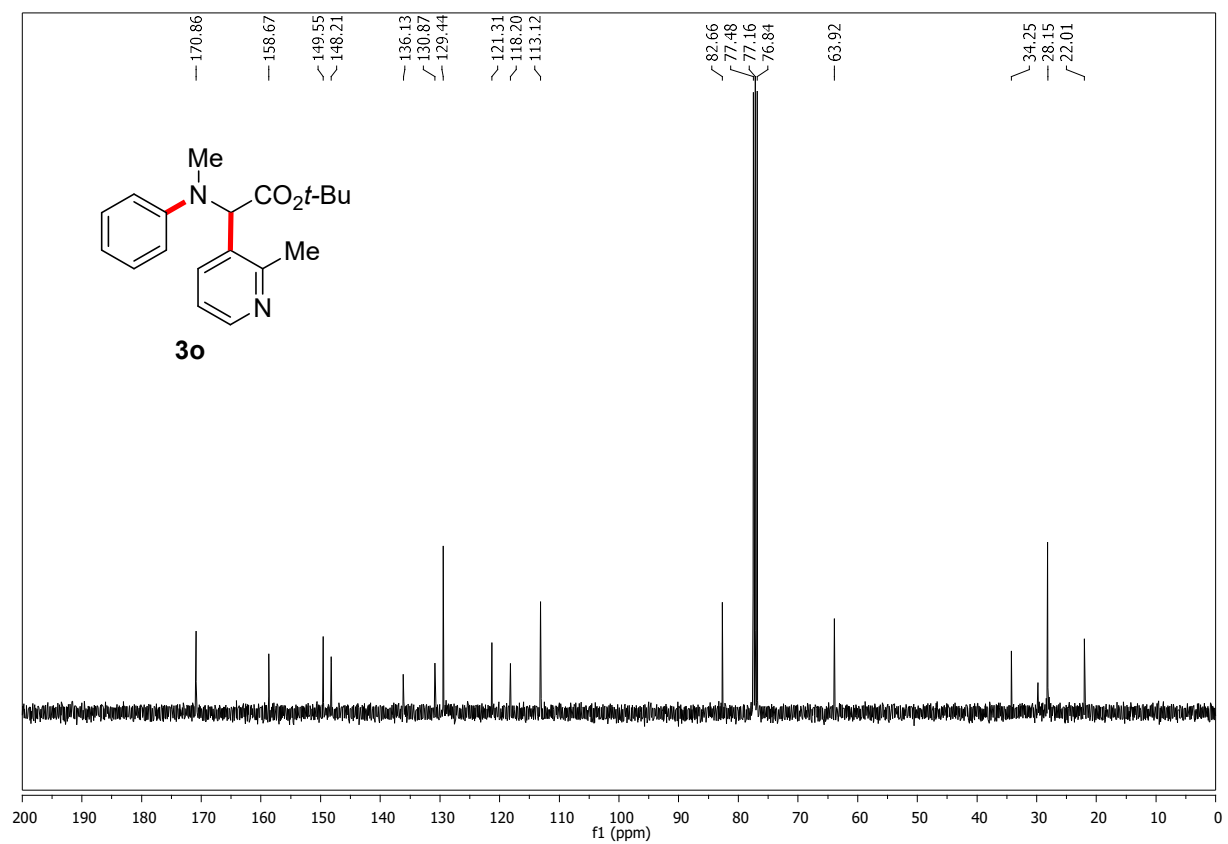

**Methyl 3-(2-(*tert*-butoxy)-1-(butyl(phenyl)amino)-2-oxoethyl)-4-methylbenzoate (3p)**

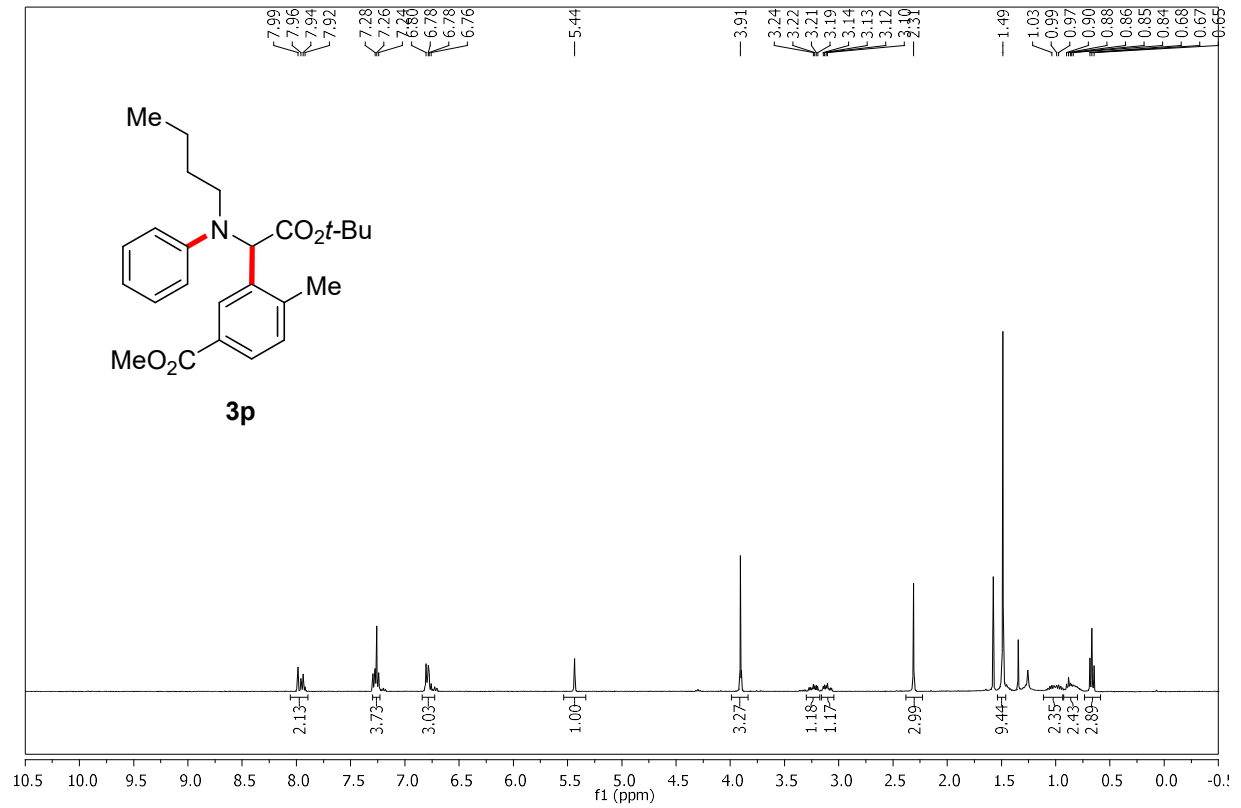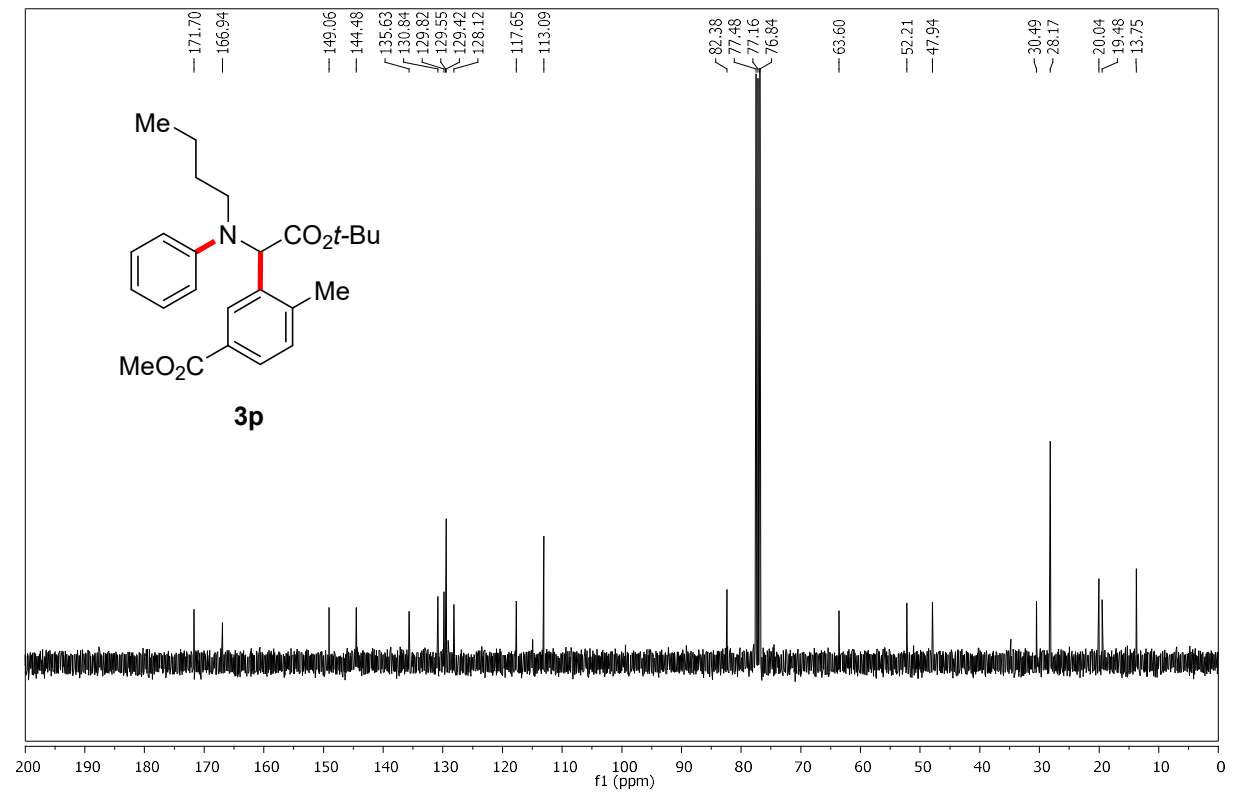

**Methyl 3-(2-(*tert*-butoxy)-1-(dodecyl(phenyl)amino)-2-oxoethyl)-4-methylbenzoate (3q)**

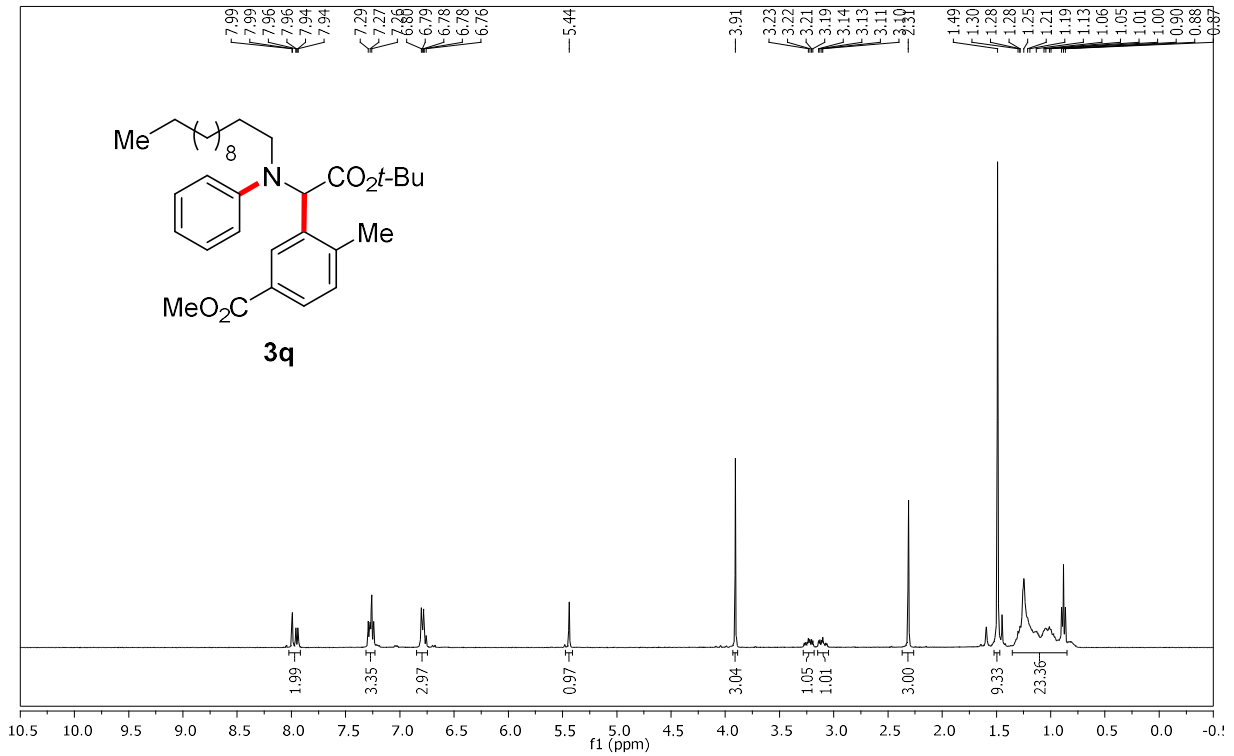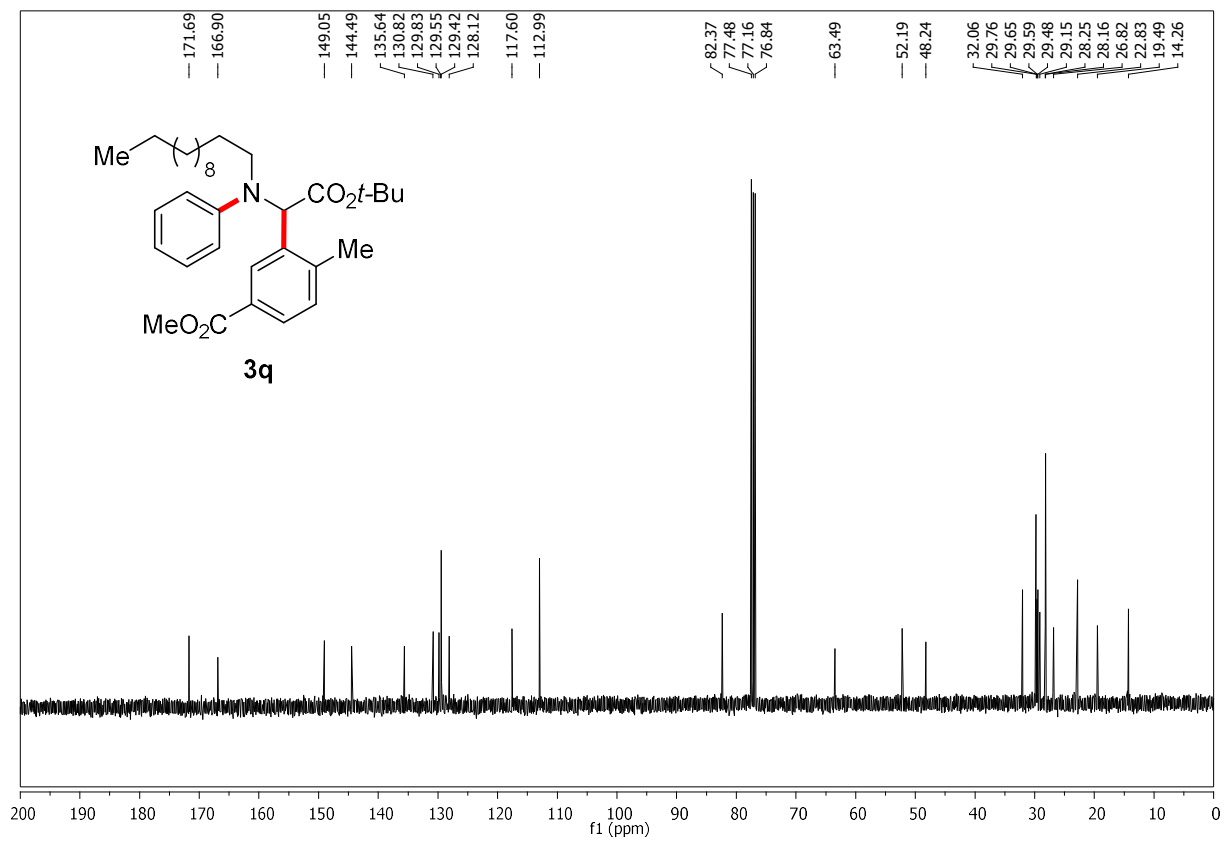



### Methyl 3-(cyano(methyl(phenyl)amino)methyl)-4-methylbenzoate (3r)

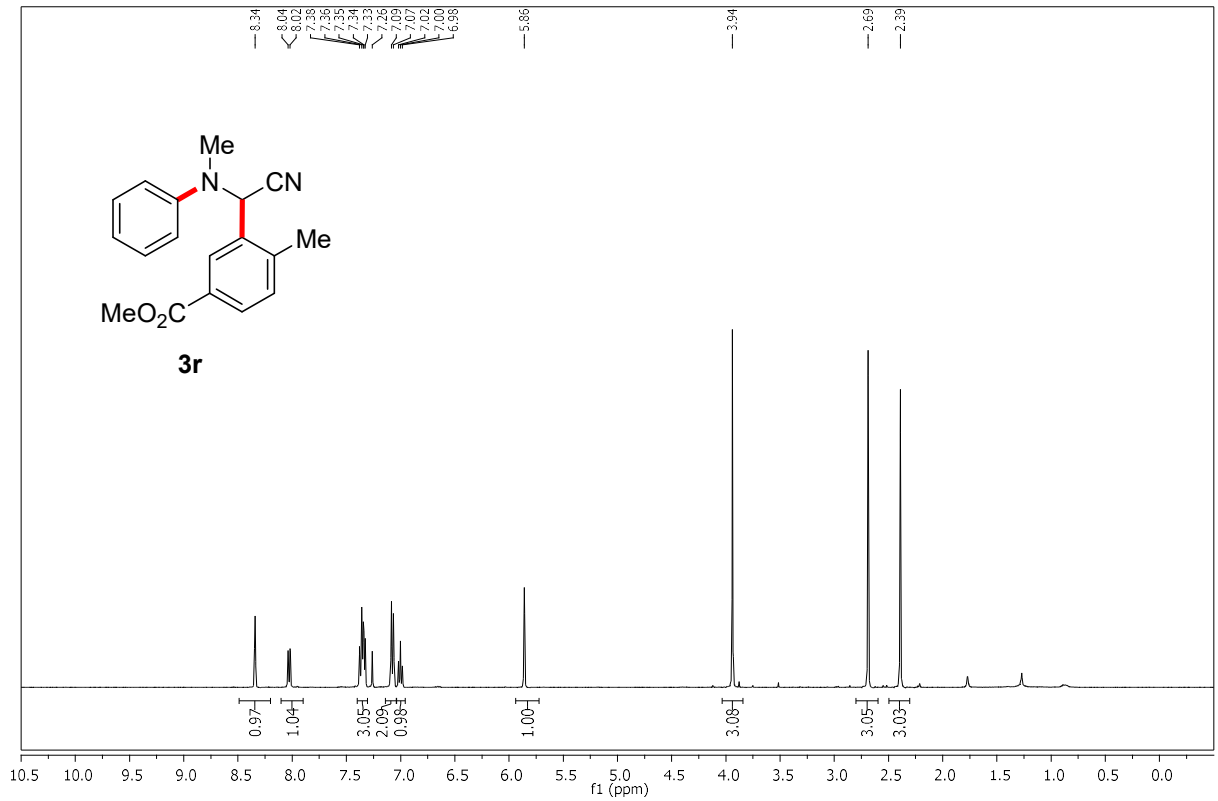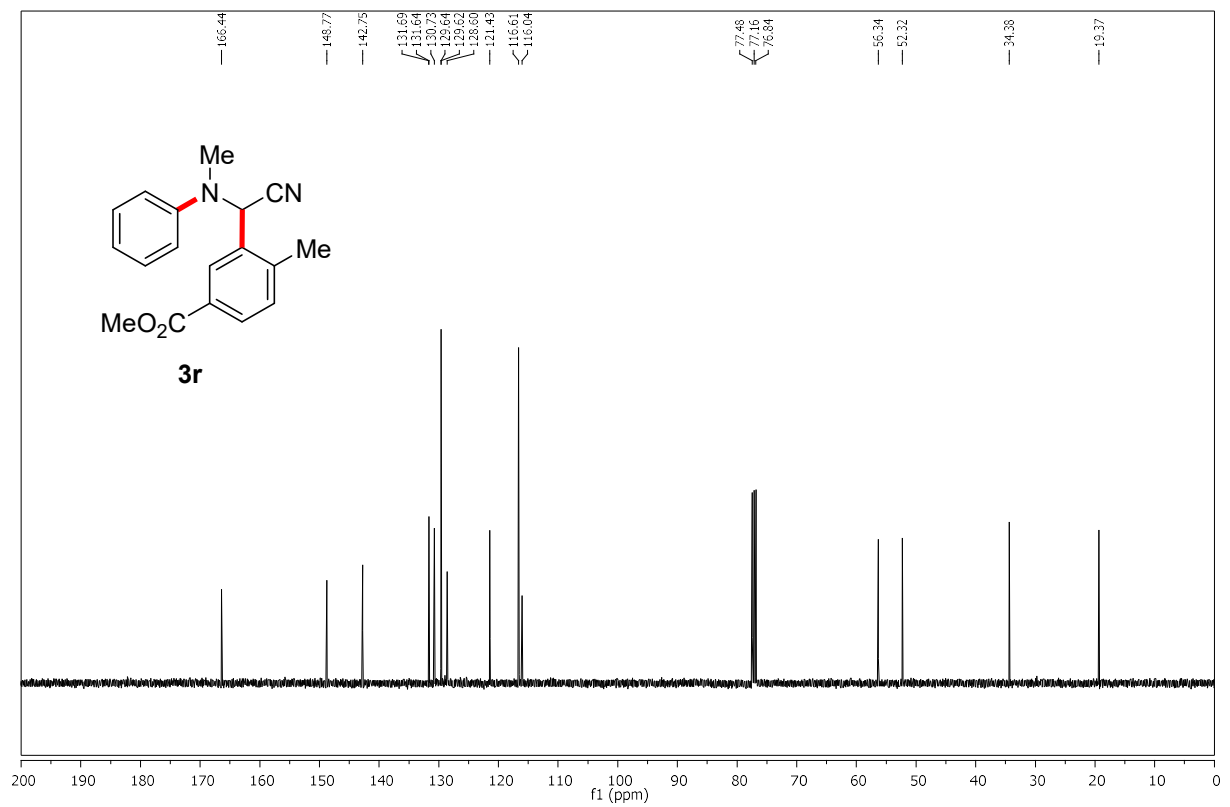

**Methyl 3-(2-(benzyloxy)-1-(methyl(phenyl)amino)-2-oxoethyl)-4-methylbenzoate (3s)**

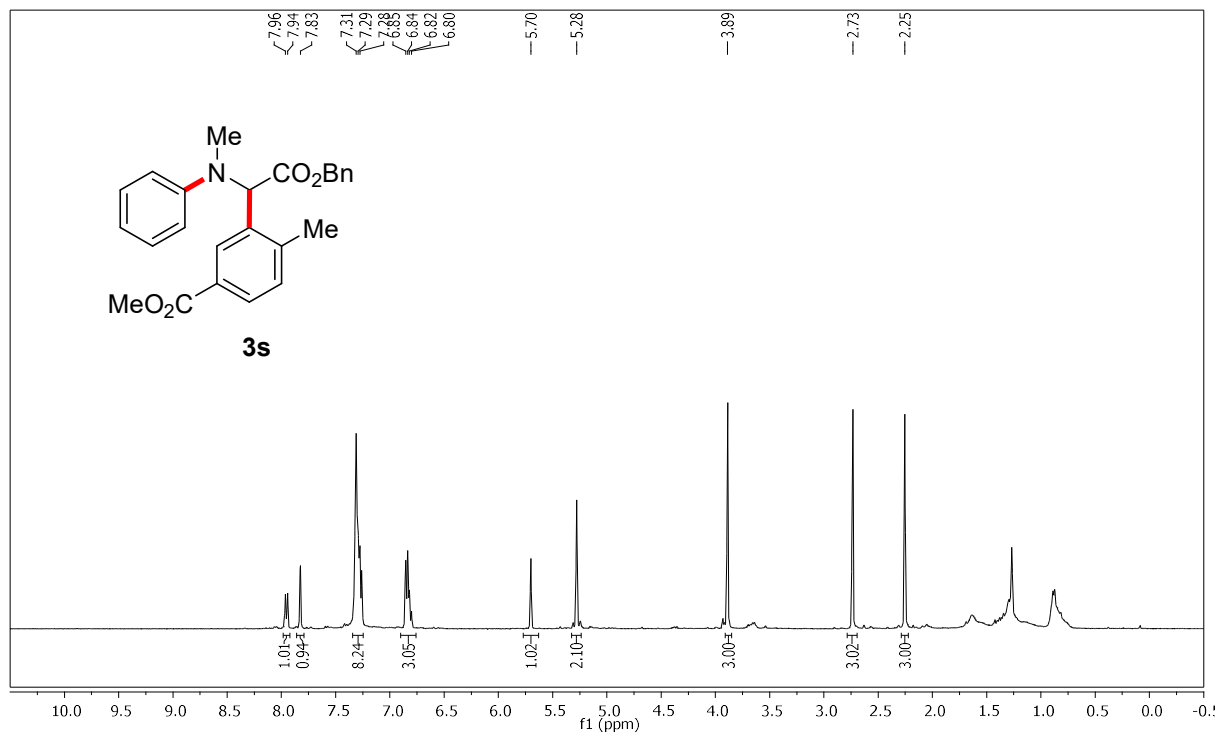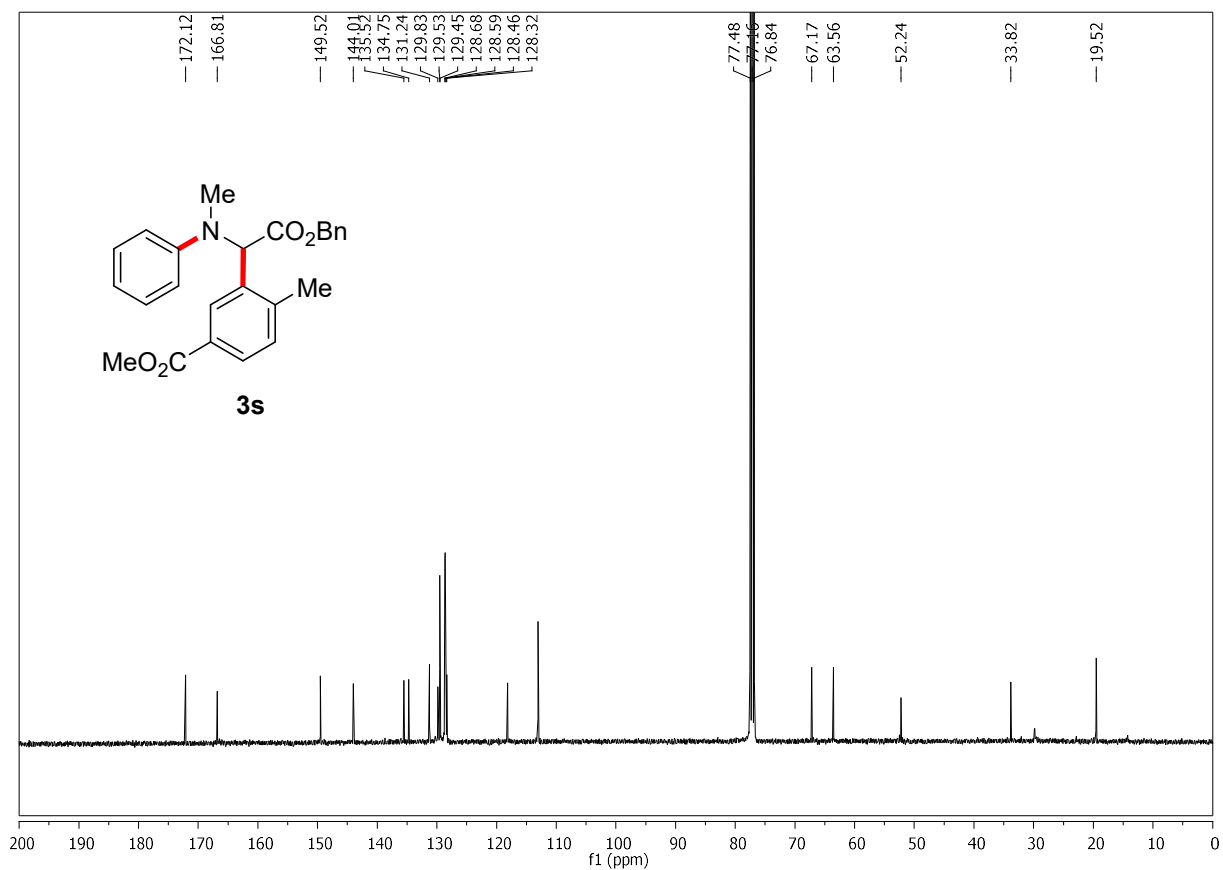

### Methyl 3-(2-ethoxy-1-(methyl(phenyl)amino)-2-oxoethyl)-4-methylbenzoate (3t)

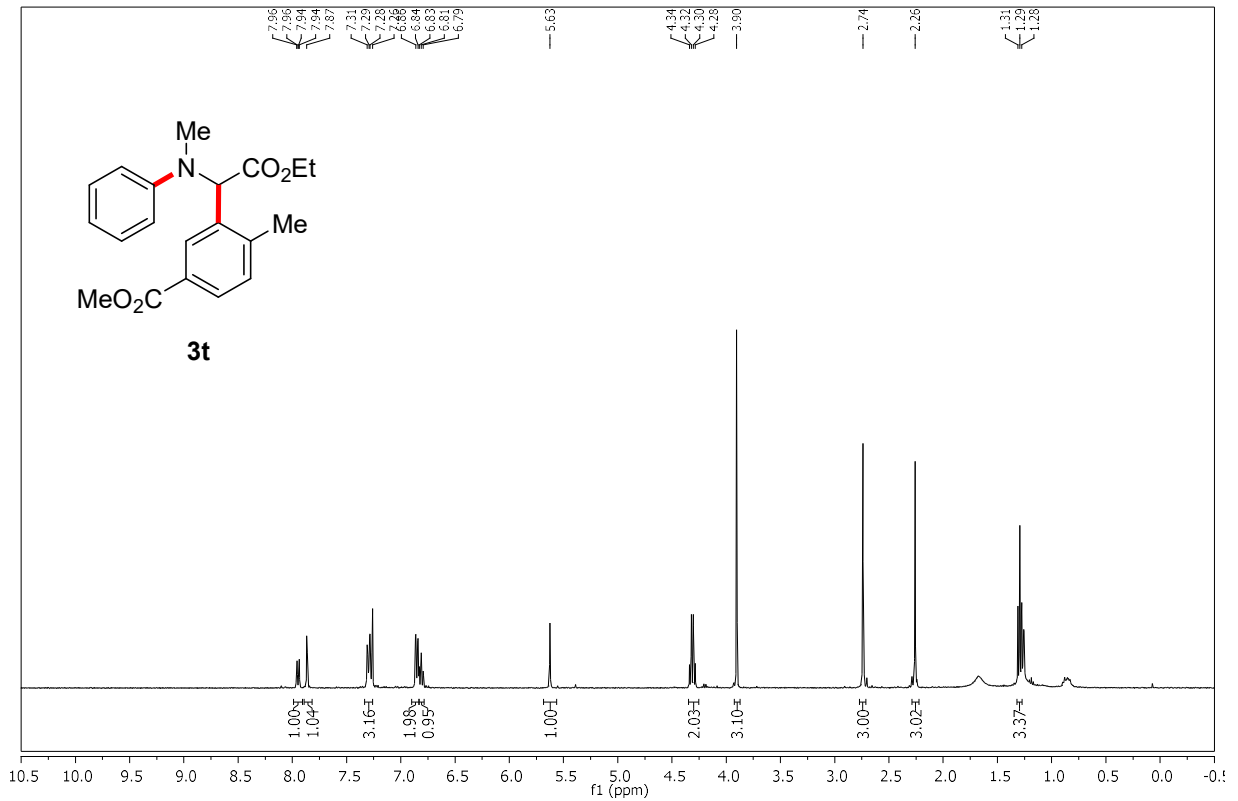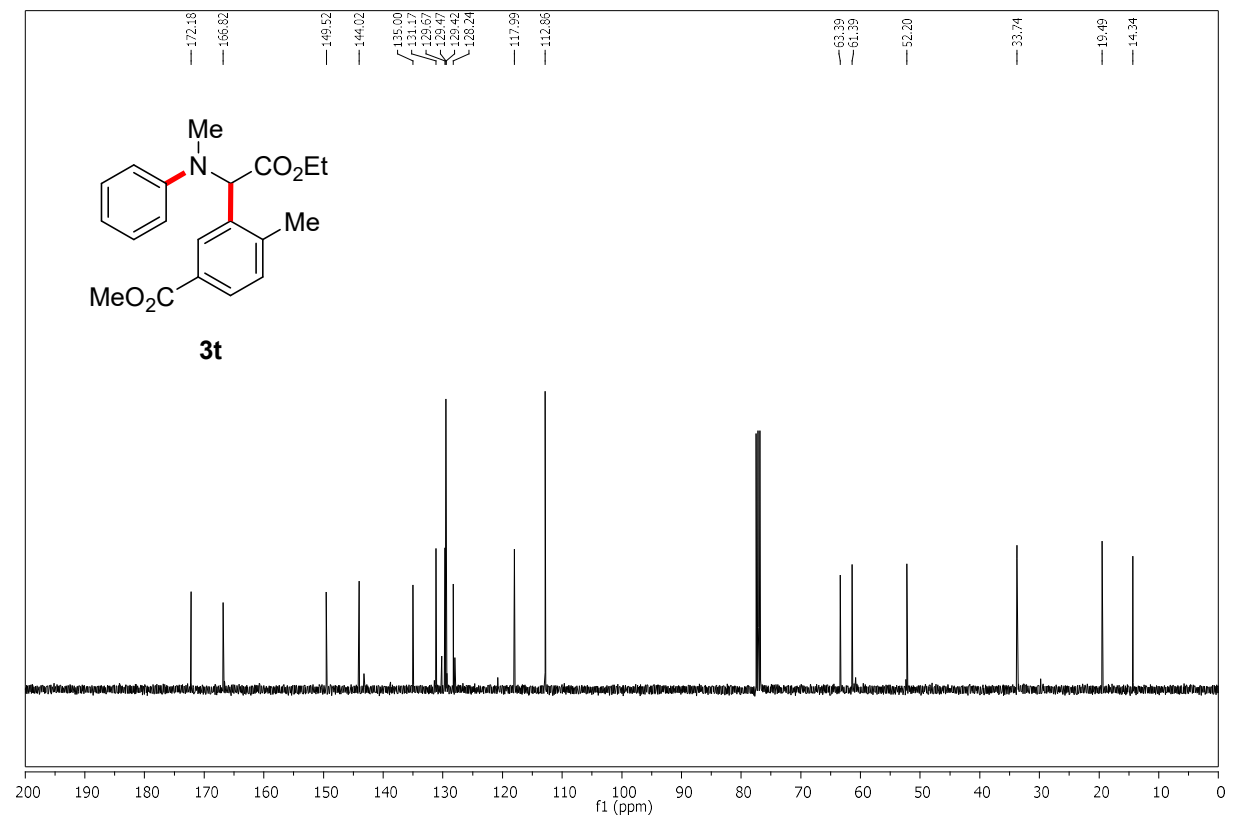

**Methyl 3-(2-methoxy-1-(methyl(phenyl)amino)-2-oxoethyl)-4-methylbenzoate (3u)**

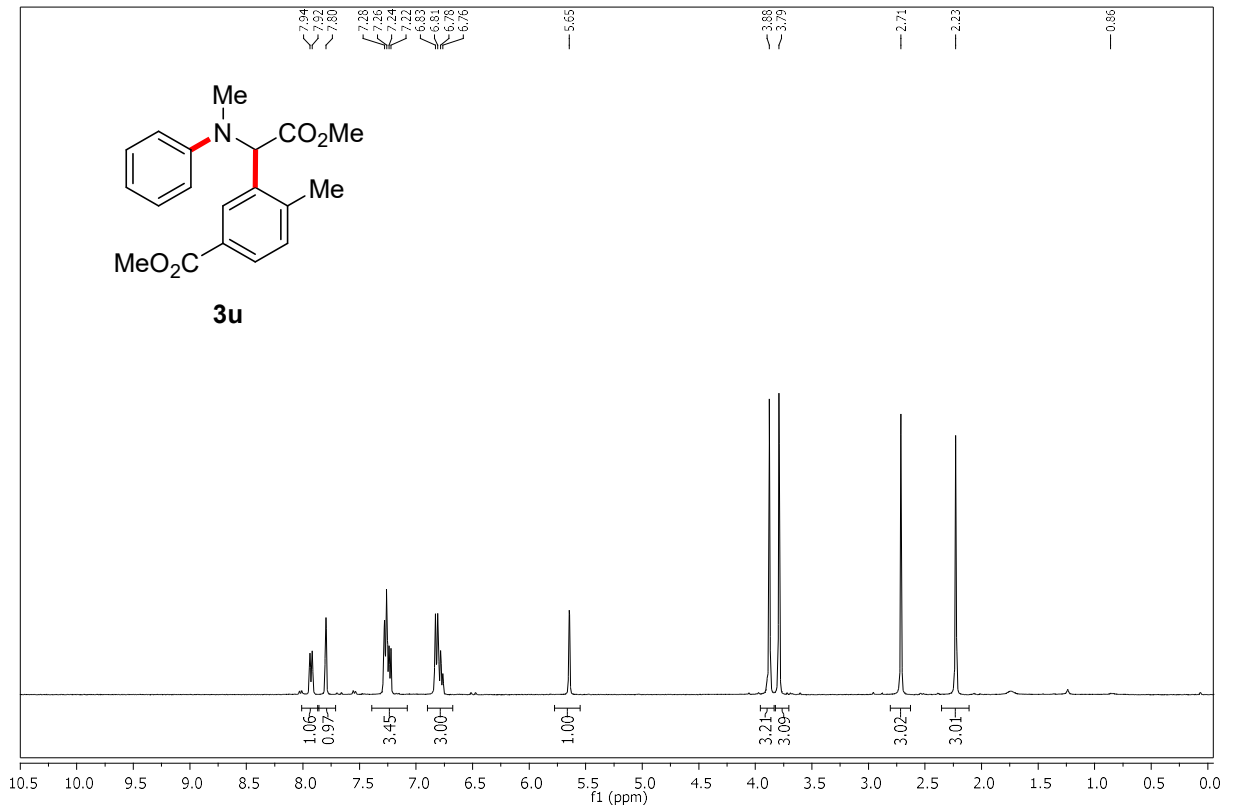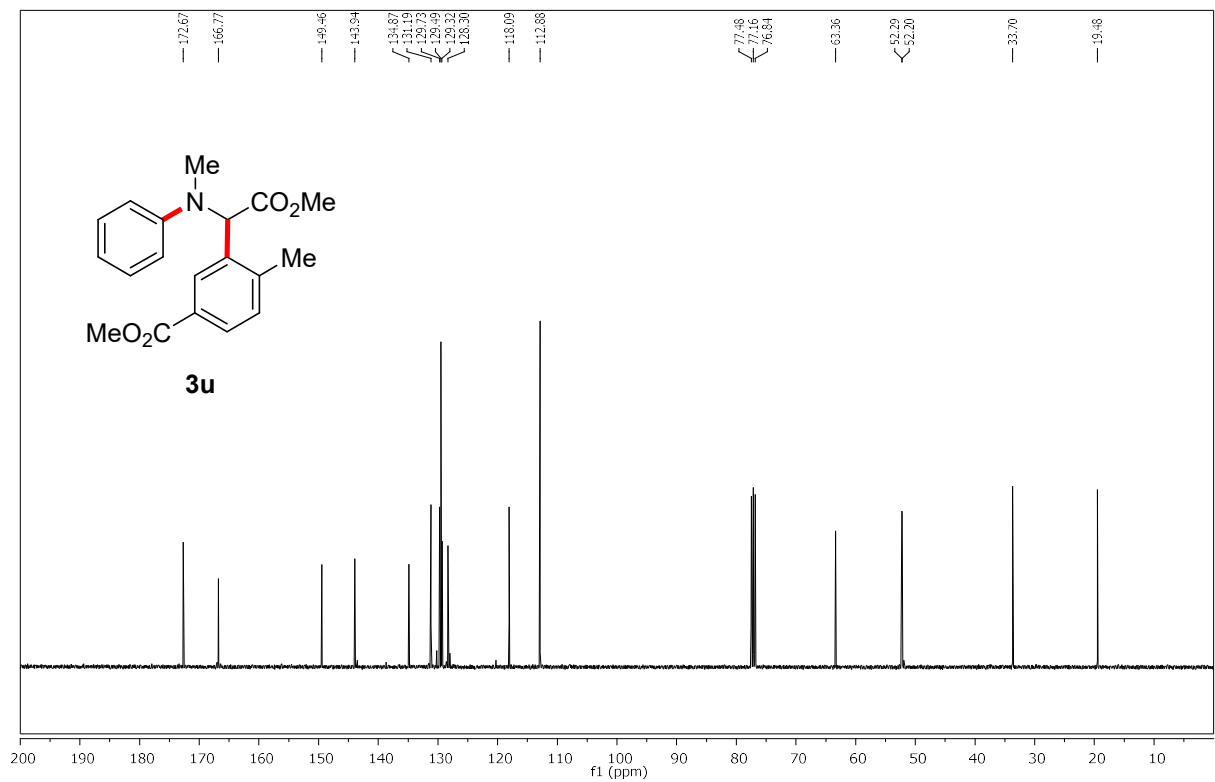

**Methyl 3-(2-isopropoxy-1-(methyl(phenyl)amino)-2-oxoethyl)-4-methylbenzoate (3v)**

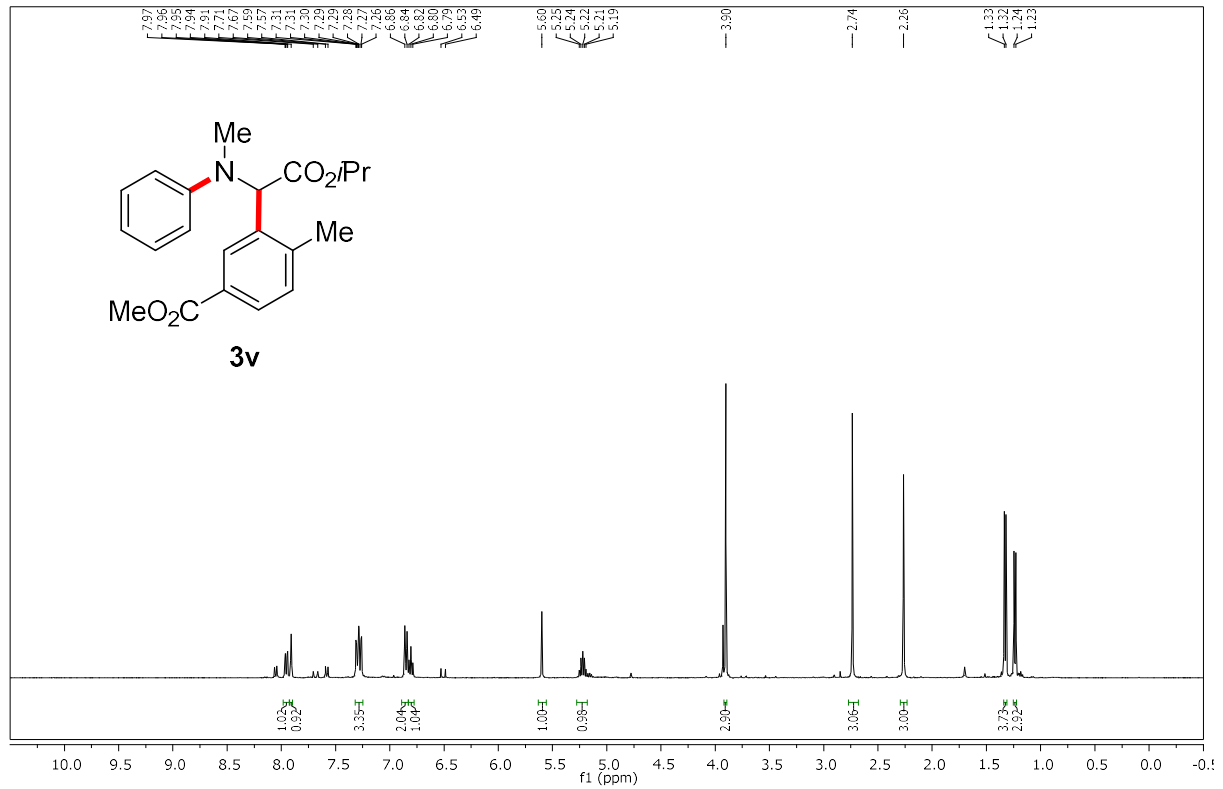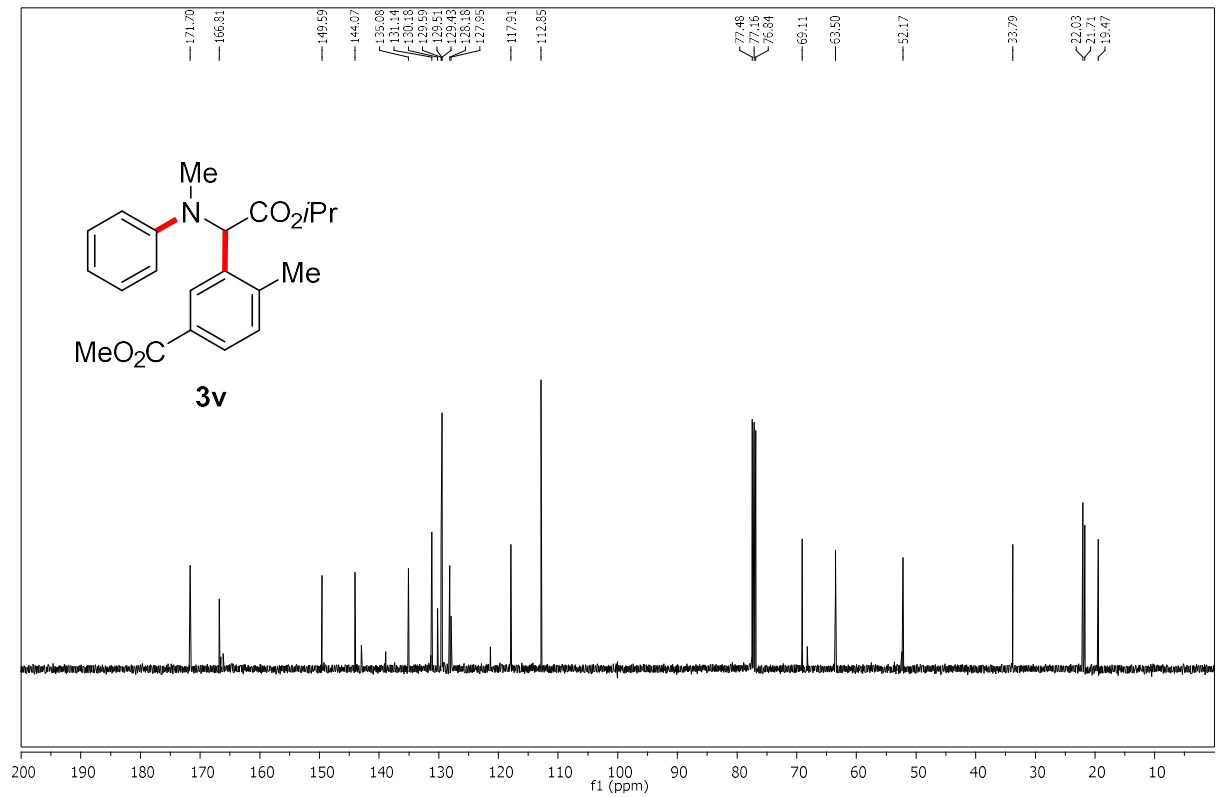

**Methyl 4-(3-(*tert*-butoxy)-2-(methyl(phenyl)amino)-3-oxopropyl)benzoate (4a)**

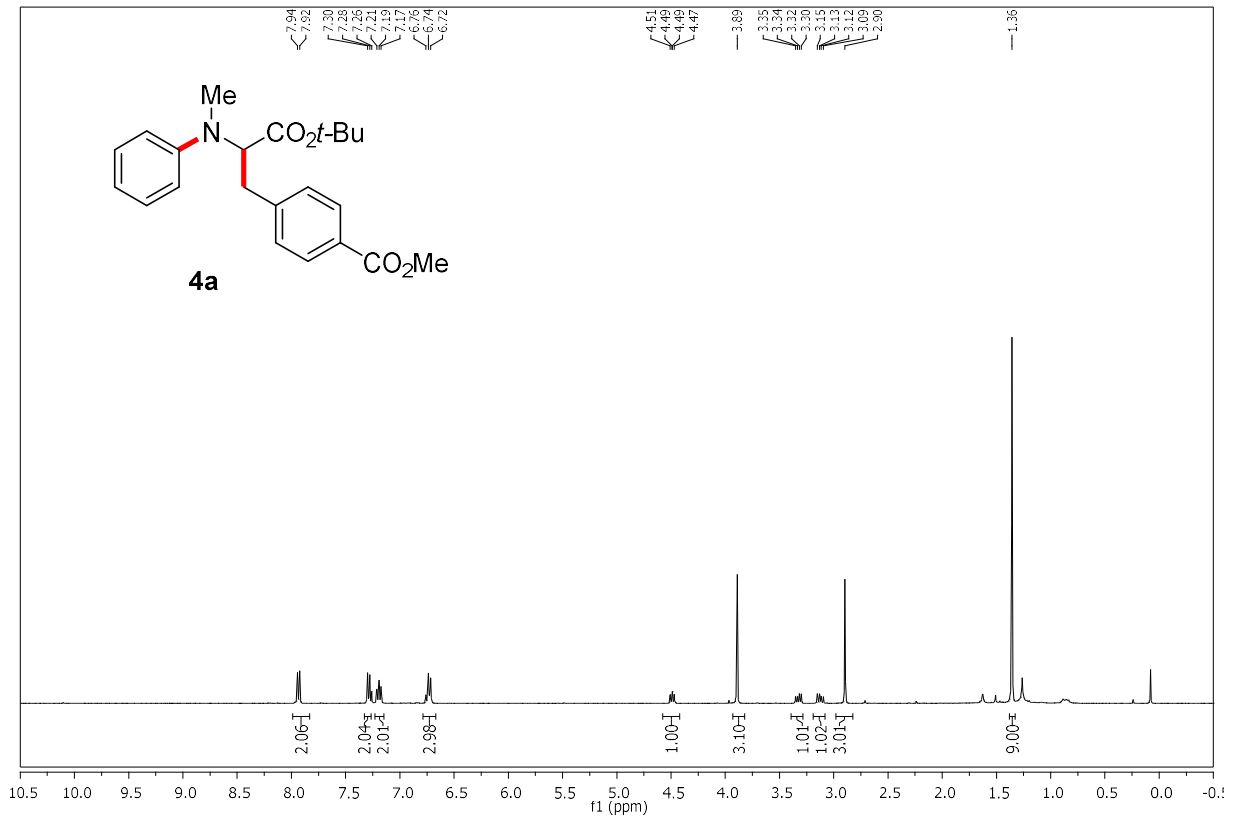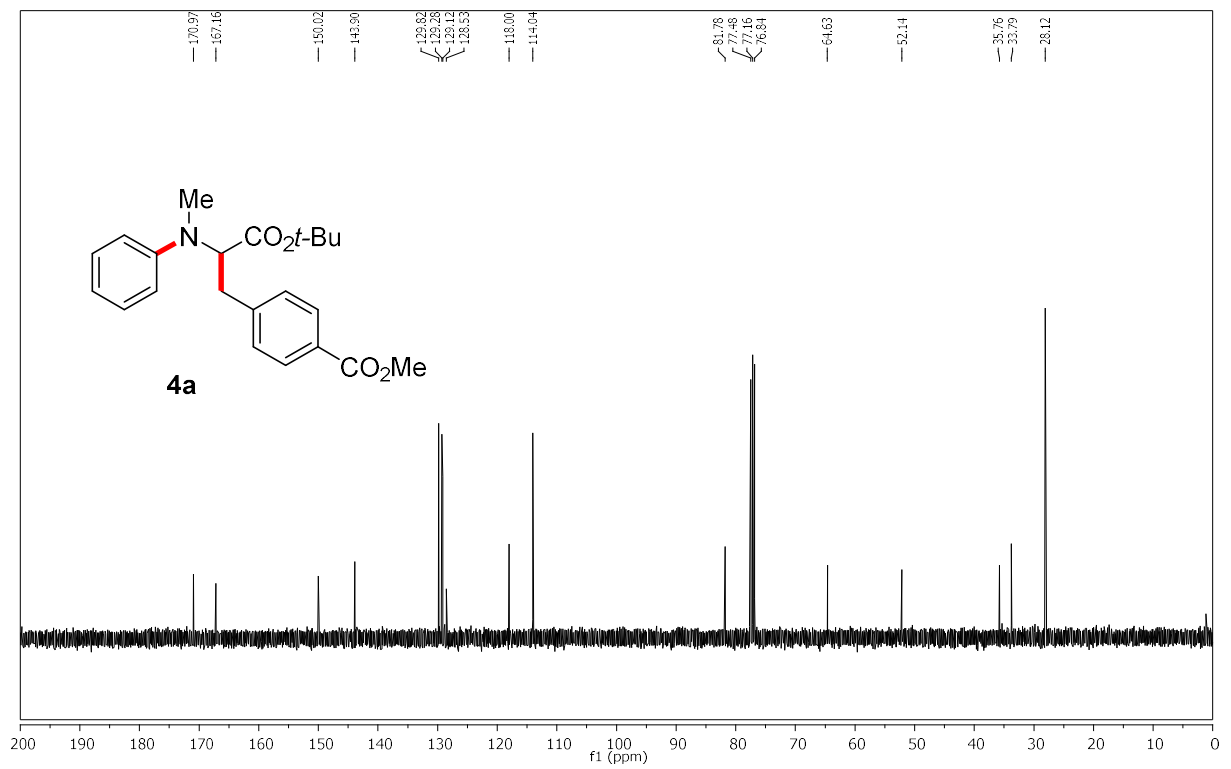

Methyl (S)-2-benzyl-1-phenylpyrrolidine-2-carboxylate (4w)

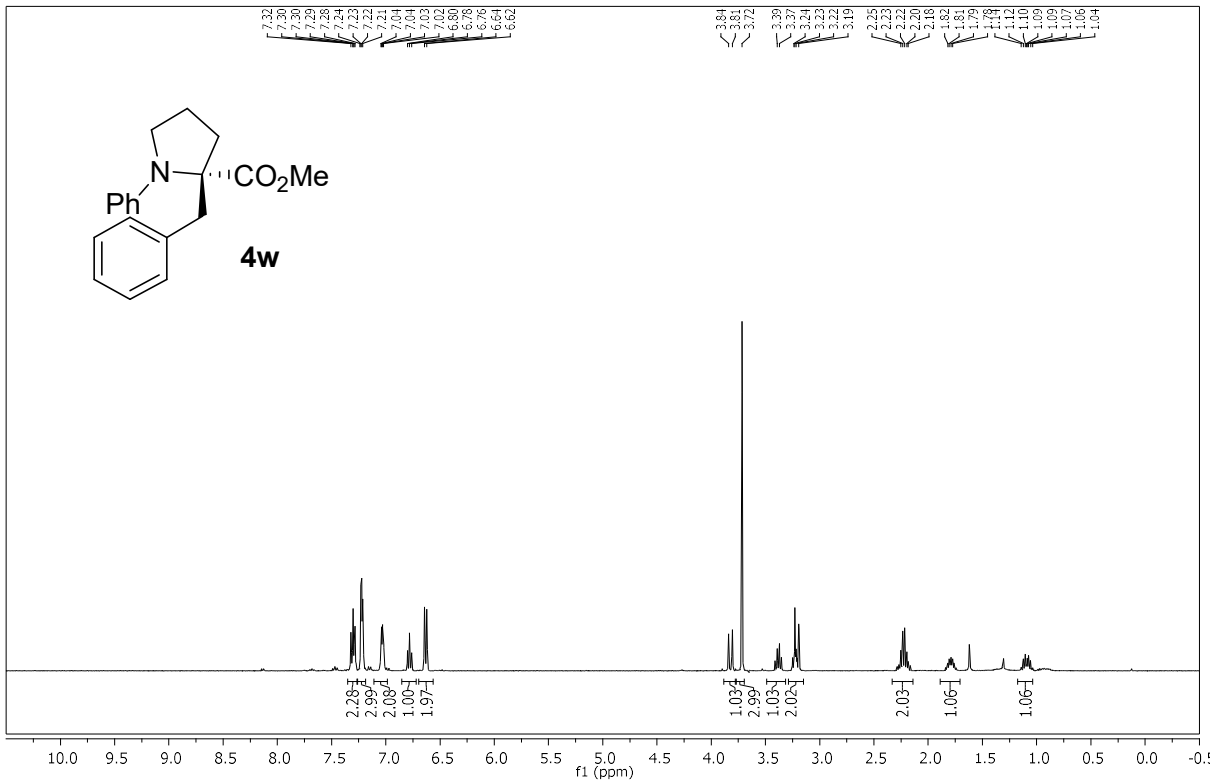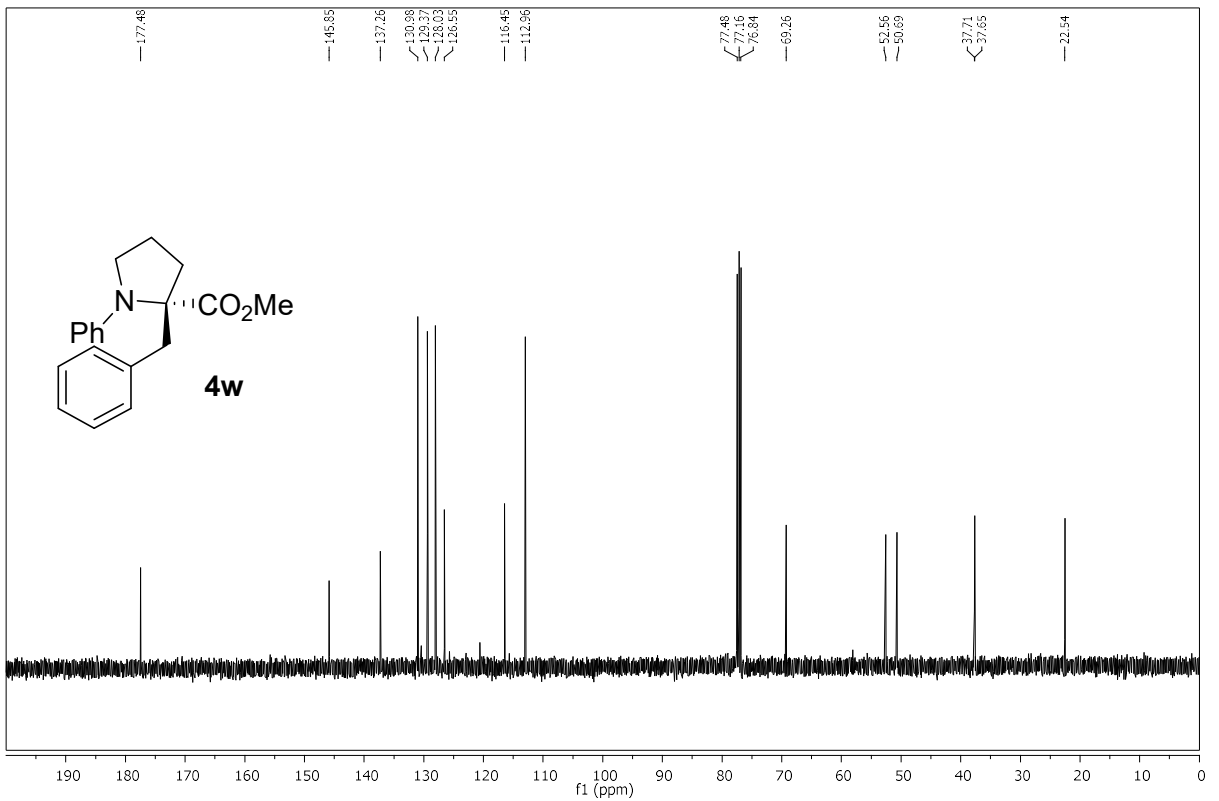

**Methyl 3-(cyanomethyl)-4-((cyclohexyl(phenyl)amino)methyl)benzoate (5)**

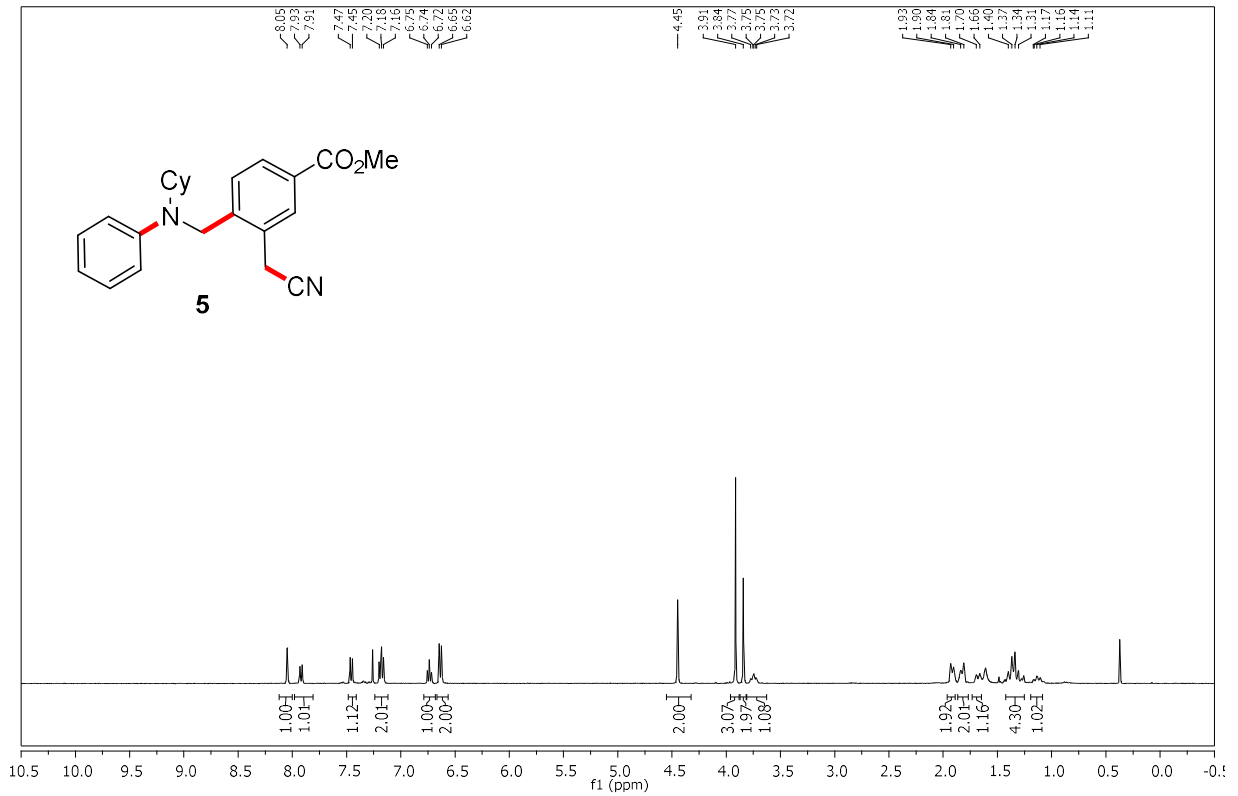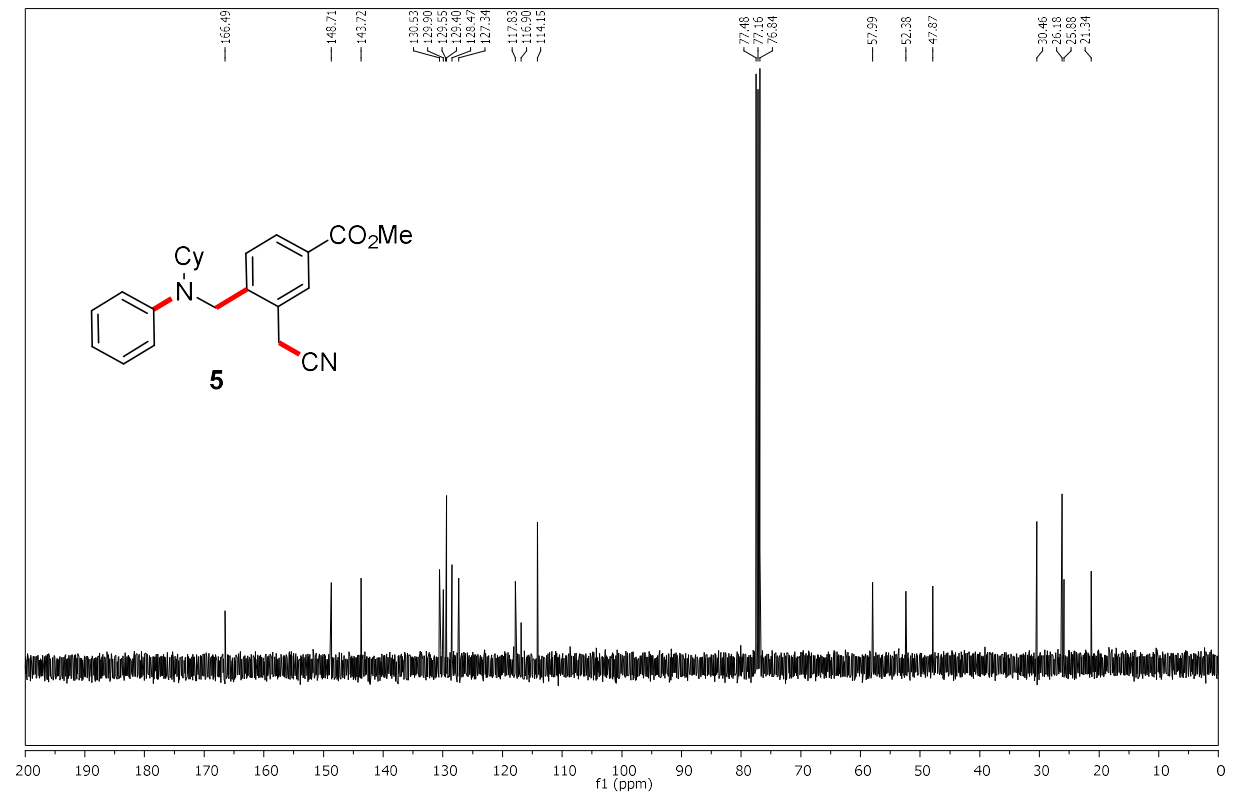



## HPLC data of Chiral Proline Derivative 4w

Sample Info : ChiralpakCEL OD-H, 1% IPA-Hexane, 7.0 ml/min, 254nm

Additional Info : Peak(s) manually integrated

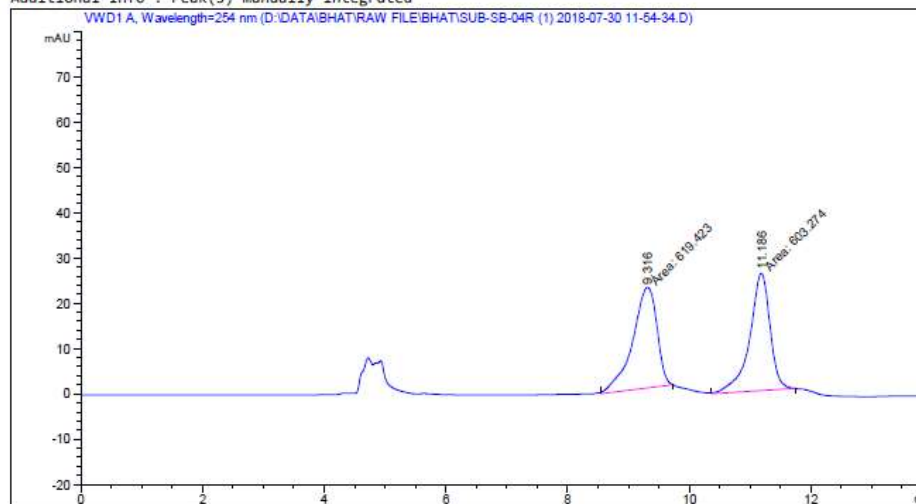

| Peak # | RetTime [min] | Type | Width [min] | Area [mAU*s] | Height [mAU] | Area %  |
|--------|---------------|------|-------------|--------------|--------------|---------|
| 1      | 9.316         | MM   | 0.4652      | 619.42291    | 22.19272     | 50.6604 |
| 2      | 11.186        | MM   | 0.3873      | 603.27448    | 25.96322     | 49.3396 |

Totals : 1222.69739 48.15593

Sample Info : CHIRALCEL OD-H 1% ipa-Hexane, 0.70 ml/min, 254nm

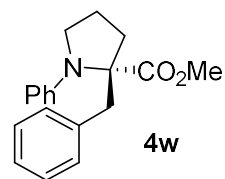

Additional Info : Peak(s) manually integrated

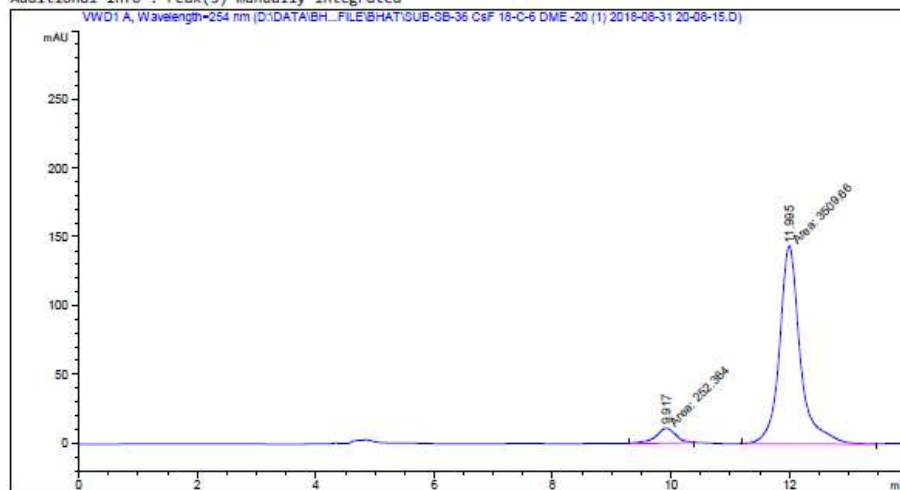

| Peak # | RetTime [min] | Type | Width [min] | Area [mAU*s] | Height [mAU] | Area %  |
|--------|---------------|------|-------------|--------------|--------------|---------|
| 1      | 9.917         | MM   | 0.3925      | 252.36441    | 10.71515     | 6.7082  |
| 2      | 11.995        | MM   | 0.4072      | 3509.65503   | 143.64973    | 93.2918 |

Totals : 3762.01944 154.36489
